# Supplementary material
Source: ML conference proceedings conference paper supplement (https://openreview.net/forum?id=ca2QmdOlIh)
Supplement: supplementary_material [file attachment]

---

# Bayesian Extensive-Rank Matrix Factorization with Rotational Invariant Priors

---

Anonymous Author(s)

Affiliation

Address

email

## Abstract

1 We consider a statistical model for matrix factorization in a regime where the rank  
2 of the two hidden matrix factors grows linearly with their dimension and their  
3 product is corrupted by additive noise. Despite various approaches, statistical and  
4 algorithmic limits of such problems have remained elusive. We study a Bayesian  
5 setting with the assumptions that (a) one of the matrix factors is symmetric, (b)  
6 both factors as well as the additive noise have rotational invariant priors, (c) the  
7 priors are known to the statistician. We derive analytical formulas for *Rotation*  
8 *Invariant Estimators* to reconstruct the two matrix factors, and conjecture that  
9 these are optimal in the large-dimension limit, in the sense that they minimize  
10 the average mean-square-error. We provide numerical checks which confirm the  
11 optimality conjecture when confronted to *Oracle Estimators* which are optimal by  
12 definition, but involve the ground-truth. Our derivation relies on a combination of  
13 tools, namely random matrix theory transforms, spherical integral formulas, and  
14 the replica method from statistical mechanics.

## 15 1 Introduction

16 Matrix factorization (MF) is the problem of reconstructing two matrices  $\mathbf{X}$  and  $\mathbf{Y}$  from the noisy  
17 observations of their product. Applications in signal processing and machine learning abound, such as  
18 for example dimensionality reduction [1, 2], sparse coding [3–5], representation learning [6], robust  
19 principal components analysis [7, 8], blind source separation [9], or matrix completion [10, 11].

20 In this work we approach the problem from a Bayesian perspective and assume that an observation or  
21 data matrix  $\mathbf{S} = \sqrt{\kappa}\mathbf{X}\mathbf{Y} + \mathbf{W}$  is given to a statistician who knows the prior distributions of  $\mathbf{X}$  and  
22  $\mathbf{Y}$  as well as the prior of the additive noise matrix  $\mathbf{W}$  and the signal-to-noise ratio  $\kappa > 0$ . The task  
23 of the statistician is to construct estimators  $\Xi_{\mathbf{X}}(\cdot)$ ,  $\Xi_{\mathbf{Y}}(\cdot)$  for the matrix factors  $\mathbf{X}$ ,  $\mathbf{Y}$ , that ideally,  
24 minimize the average mean-square-error (MSE)  $\mathbb{E}\|\mathbf{X} - \Xi_{\mathbf{X}}(\mathbf{S})\|_{\mathbb{F}}^2$  and  $\mathbb{E}\|\mathbf{Y} - \Xi_{\mathbf{Y}}(\mathbf{S})\|_{\mathbb{F}}^2$  ( $\|\cdot\|_{\mathbb{F}}$   
25 the Frobenius norm and  $\mathbb{E}$  the expectation w.r.t  $\mathbf{X}$ ,  $\mathbf{Y}$ ,  $\mathbf{W}$ ). We consider priors which are rotation  
26 invariant for all three matrices  $\mathbf{X}$ ,  $\mathbf{Y}$ ,  $\mathbf{W}$  and for  $\mathbf{X}$  we furthermore impose that it is square and  
27 symmetric. These matrix ensembles are defined precisely in section 2.1, but the reader can keep in  
28 mind the examples of Wigner or Wishart matrices for  $\mathbf{X}$ , and general Gaussian  $\mathbf{Y}$  and  $\mathbf{W}$  with i.i.d  
29 elements. We look at the asymptotic regime where all matrix dimensions and ranks tend to infinity  
30 at the same speed. We remark that the usual "rotation ambiguity" occurring in MF is not present  
31 because we impose that at least one of the two matrix factors is symmetric. We also remark that  
32 MF is different (and more difficult) than matrix denoising which would consist in constructing an  
33 estimator  $\Xi_{\mathbf{XY}}(\mathbf{S})$  for the signal as a whole by minimizing  $\mathbb{E}\|\mathbf{XY} - \Xi_{\mathbf{XY}}(\mathbf{S})\|_{\mathbb{F}}^2$ .

34 The rotation invariance of the model implies that the estimators minimizing the MSE belong to  
35 the class of rotation invariant estimators (RIE). RIEs are matrix estimators which have the same  
36 singular vectors (or eigenvectors) as the observation or data matrix. These estimators have been

proposed for matrix *denoising* problems (see references [12–15] for covariance estimation, [16] for cross-covariance estimation, and [17], [18] for extensions to rectangular matrices). For the present MF model, we derive optimal estimators (minimizing the MSE) that belong to the RIE class and can be computed explicitly in the large dimensional limit from the observation matrix and the knowledge of the priors. We propose:

1. an explicit RIE to estimate  $\mathbf{X}$ , which requires the knowledge of the priors of *both*  $\mathbf{X}$ ,  $\mathbf{Y}$  and of the noise  $\mathbf{W}$ . Moreover, under the assumption that  $\mathbf{X}$  is positive-semi-definite, a *sub-optimal* RIE can be derived which *does not* require any prior on  $\mathbf{X}$ .
2. an explicit RIE to estimate  $\mathbf{Y}$ , which requires the knowledge of the priors of the noise  $\mathbf{W}$  and  $\mathbf{X}$  *only* (the prior of  $\mathbf{Y}$  is not required).
3. combined with the singular value decomposition (SVD) of the observation matrix, our explicit RIEs provide a spectral algorithm to reconstruct both factors  $\mathbf{X}$  and  $\mathbf{Y}$ .

The derivation of the proposed estimators relies on the replica method from statistical mechanics combined with techniques from random matrix theory and finite-rank spherical integrals [19, 20]. Although the replica method is not rigorous and involves concentration assumptions, the derivation is entirely analytical and suggests that the estimators are optimal in the limit of large dimensions. This is corroborated by numerical calculations comparing our explicit RIEs with Oracle Estimators which are optimal by definition and involve the ground-truth matrices.

## 1.1 Related literature and discussion

When the matrices  $\mathbf{X}$  and  $\mathbf{Y}$  are assumed to have *low-rank* compared to their dimension, the mathematical theory of MF has enjoyed much progress under various settings (Bayesian, spectral, algorithmic) and fundamental information theoretical and algorithmic limits have been rigorously derived [21–27].

In extensive-rank regimes, when the rank grows like the matrix dimensions, despite various attempts there is no solid theory of MF. One approach is based on Approximate Message Passing (AMP) methods developed in [28–30]. Despite acceptable performance in practical settings [31], as pointed out in [32] the AMP algorithms developed in these works are (theoretically) sub-optimal. Other approaches rooted in statistical physics have been considered in [32, 33] but have not led to explicit reconstructions of matrix factors or algorithms. A practical probabilistic approach to MF problem is based on variational Bayesian approximations [34–36], in which one tries to approximate the posterior distribution with proper distribution. In [37] it is shown that under Gaussian priors, the solution to the MF problem is a reweighted SVD of the observation matrix. We point out here that these estimators can be seen as a RIE and therefore there seems to be a rather close relation between the RIE studied here and the variational Bayesian approach. This also suggests that adapting RIEs to real data is an interesting direction for future research. Finally, let us also mention optimization approaches where one constructs estimators by following a gradient flow (or gradient descent) trajectory of a training loss of the type  $\|\mathbf{S} - \mathbf{X}\mathbf{Y}\|_F^2 + \text{reg. term}$  (see [38], [39] for analysis in rotation invariant models). Benchmarking these various other algorithmic approaches against our explicit RIEs (conjectured to be optimal) is outside the scope of this work and is left for future work.

Constraints such as sparsity or non-negativity of the matrix entries which have important applications [40] are not covered by our theory. Despite this drawback, we believe that the proposed estimators are important both for theoretical and practical purposes. Even in non-rotation invariant problems our explicit RIEs may serve as sub-optimal estimators, and as we show in an example they can be used as a "warmed-up" spectral initialization for more efficient algorithms (see for example [41, 42] for related ideas in other contexts). The methodology developed here may open up the way to further analysis in inference and learning problems perhaps also in the context of neural networks where extensive rank weight matrices must be estimated.

## 1.2 Organization and notations

In section 2, we introduce the precise MF model, general class of RIEs, and the Oracle estimators. In section 3, we present the explicit RIEs (and algorithm) to estimate  $\mathbf{X}$  and  $\mathbf{Y}$ . We provide the numerical examples and calculations in section 4. In section 5, we sketch the derivation of RIE for  $\mathbf{X}$ , while the one for  $\mathbf{Y}$  is similar and deferred to the appendices.

The following notations are used throughout. For a vector  $\gamma \in \mathbb{R}^N$  we denote by  $\Gamma \in \mathbb{R}^{N \times M}$  a matrix constructed as  $\Gamma = [\Gamma_N \mid \mathbf{0}_{N \times (M-N)}]$  with  $\Gamma_N \in \mathbb{R}^{N \times N}$  a diagonal matrix with diagonal  $\gamma$ . The same notations will also be used for the vector  $\sigma$  and the corresponding matrix  $\Sigma$  and . For a sequence of non-symmetric matrices  $\mathbf{A}$  of growing size, we denote the limiting empirical singular value distribution (ESD) by  $\mu_A$ , and the limiting empirical eigenvalue distribution of  $\mathbf{A}\mathbf{A}^\top$  by  $\rho_A$ . For a sequence of symmetric matrices  $\mathbf{B}$  of growing size, we denote the limiting empirical eigenvalue distribution by  $\rho_B$ , and the limiting eigenvalue distribution of  $\mathbf{B}^2$  by  $\rho_{B^2}$ .

## 2 Matrix factorization model and rotation invariant estimators

### 2.1 Matrix factorization model

Let  $\mathbf{X} = \mathbf{X}^\top \in \mathbb{R}^{N \times N}$  a symmetric matrix distributed according to a rotationally invariant prior  $P_X(\mathbf{X})$ , i.e., for any orthogonal matrix  $\mathbf{O} \in \mathbb{R}^{N \times N}$  we have  $P_X(\mathbf{O}\mathbf{X}\mathbf{O}^\top) = P_X(\mathbf{X})$ . Let also  $\mathbf{Y} \in \mathbb{R}^{N \times M}$  be distributed according to a bi-rotationally invariant prior  $P_Y(\mathbf{Y})$ , i.e. for any orthogonal matrices  $\mathbf{U} \in \mathbb{R}^{N \times N}$ ,  $\mathbf{V} \in \mathbb{R}^{M \times M}$  we have  $P_Y(\mathbf{U}\mathbf{Y}\mathbf{V}^\top) = P_Y(\mathbf{Y})$ . We observe the data matrix  $\mathbf{S} \in \mathbb{R}^{N \times M}$ ,

$$\mathbf{S} = \sqrt{\kappa}\mathbf{X}\mathbf{Y} + \mathbf{W} \quad (1)$$

where  $\mathbf{W} \in \mathbb{R}^{N \times M}$  is also bi-rotationally invariant distributed, and  $\kappa \in \mathbb{R}_+$  is proportional to the signal-to-noise-ratio (SNR). The goal is to recover *both factors*  $\mathbf{X}$  and  $\mathbf{Y}$  from the data matrix  $\mathbf{S}$ . For definiteness, we consider the regime  $M \geq N$  with aspect ratio  $N/M \rightarrow \alpha \in (0, 1]$  as  $N \rightarrow \infty$ . The case of  $\alpha > 1$  can be analyzed in the same manner and is presented in section F. Furthermore, we assume that the entries of  $\mathbf{X}$ ,  $\mathbf{Y}$  and  $\mathbf{W}$  are of the order  $O(1/\sqrt{N})$ . This scaling is such that the eigenvalues of  $\mathbf{X}$  and singular values of  $\mathbf{Y}$ ,  $\mathbf{W}$  and  $\mathbf{S}$  are of the order  $O(1)$  as  $N \rightarrow \infty$ .

**Assumption 1.** *The empirical eigenvalue distribution of  $\mathbf{X}$  converge weakly to measure  $\rho_X$ , and the ESD of  $\mathbf{Y}$ ,  $\mathbf{W}$  converge weakly to measures  $\mu_Y, \mu_W$  with bounded support on the real line. Moreover, these measures are known to the statistician. He can deduce (in principle) these measures from the priors on  $\mathbf{X}, \mathbf{Y}, \mathbf{W}$ .*

**Remark 1.** *In a general formulation of matrix factorization the hidden matrices have dimensions  $\mathbf{X} \in \mathbb{R}^{N \times H}$ ,  $\mathbf{Y} \in \mathbb{R}^{H \times M}$ , and in the Bayesian framework with bi-rotational invariant priors for both factors, the optimal estimators are trivially the zero matrix. Indeed, from bi-rotational invariance we have  $P_X(-\mathbf{X}) = P_X(\mathbf{X})$ ,  $P_Y(-\mathbf{Y}) = P_Y(\mathbf{Y})$ , which implies that the Bayesian estimate is zero. Here, by imposing that  $\mathbf{X} \in \mathbb{R}^{N \times N}$  is symmetric and  $P_X(\mathbf{O}\mathbf{X}\mathbf{O}^\top) = P_X(\mathbf{X})$ , we can break this symmetry and find non-trivial estimators. This is due to the fact that the map  $\mathbf{X} \rightarrow -\mathbf{X}$  cannot be realized as a (real) orthogonal transformation, so  $P_X(-\mathbf{X}) = P_X(\mathbf{X})$  does not hold in general (various examples are given in section 4 and appendices). Of course, if the prior is even, e.g. Wigner ensemble, again the Bayesian posterior estimate is trivially zero for both factors. As we will see our RIEs are consistent with these observations.*

### 2.2 Rotation invariant estimators

To recover matrices  $\mathbf{X}, \mathbf{Y}$  from  $\mathbf{S}$ , we consider two denoising problems. One is recovering  $\mathbf{X}$  by treating both  $\mathbf{Y}, \mathbf{W}$  as "noise" matrices, and the other is estimating  $\mathbf{Y}$  by treating  $\mathbf{X}, \mathbf{W}$  as "noise". As will become clear the procedure is not iterative, and the two denoising problems are solved independently and simultaneously. In the following, for each of these two problems, we introduce two rotation invariant classes of estimators and discuss their optimum *Oracle* estimators. We then provide an explicit construction and algorithm for RIEs which we conjecture have the optimum performance of Oracle estimators in the large  $N$  limit.

#### 2.2.1 RIE class for $\mathbf{X}$

Consider the SVD of  $\mathbf{S} = \mathbf{U}_S \mathbf{\Gamma} \mathbf{V}_S^\top$ , where  $\mathbf{U}_S \in \mathbb{R}^{N \times N}$ ,  $\mathbf{V}_S \in \mathbb{R}^{M \times M}$  are orthogonal, and  $\mathbf{\Gamma} \in \mathbb{R}^{N \times M}$  is a diagonal matrix with singular values of  $\mathbf{S}$  on its diagonal,  $(\gamma_i)_{1 \leq i \leq N}$ . A rotational invariant estimator for  $\mathbf{X}$  is denoted  $\Xi_X(\mathbf{S})$ , and is constructed as:

$$\Xi_X(\mathbf{S}) = \mathbf{U}_S \text{diag}(\xi_{x_1}, \dots, \xi_{x_N}) \mathbf{U}_S^\top \quad (2)$$

where  $\xi_{x_1}, \dots, \xi_{x_N}$  are the eigenvalues of the estimator.

136 First, we derive an *Oracle estimator* by minimizing the squared error  $\frac{1}{N}\|\mathbf{X} - \Xi_X(\mathcal{S})\|_F^2$  for a given  
 137 instance, over the RIE class or equivalently over the choice of the eigenvalues  $(\xi_{x_i})_{1 \leq i \leq N}$ . Let the  
 138 eigen-decomposition of  $\mathbf{X}$  be  $\mathbf{X} = \sum_{i=1}^N \lambda_i \mathbf{x}_i \mathbf{x}_i^\top$  with  $\mathbf{x}_i \in \mathbb{R}^N$  eigenvectors of  $\mathbf{X}$ . The error can  
 139 be expanded as:

$$\frac{1}{N}\|\mathbf{X} - \Xi_X(\mathcal{S})\|_F^2 = \frac{1}{N} \sum_{i=1}^N \lambda_i^2 + \frac{1}{N} \sum_{i=1}^N \xi_{x_i}^2 - \frac{2}{N} \sum_{i=1}^N \xi_{x_i} \sum_{j=1}^N \lambda_j (\mathbf{u}_i^\top \mathbf{x}_j)^2$$

140 where  $\mathbf{u}_i$ 's are columns of  $\mathbf{U}_S$ . Minimizing over  $\xi_{x_i}$ 's, we find the optimum among the RIE class:

$$\Xi_X^*(\mathcal{S}) = \sum_{i=1}^N \xi_{x_i}^* \mathbf{u}_i \mathbf{u}_i^\top, \quad \xi_{x_i}^* = \sum_{j=1}^N \lambda_j (\mathbf{u}_i^\top \mathbf{x}_j)^2 = \mathbf{u}_i^\top \mathbf{X} \mathbf{u}_i \quad (3)$$

141 Expression (3) defines the Oracle estimator which requires the knowledge of signal matrix  $\mathbf{X}$ .  
 142 Surprisingly, in the large  $N$  limit, the optimal eigenvalues  $(\xi_{x_i}^*)_{1 \leq i \leq N}$  can be computed from the  
 143 observation matrix and knowledge of the measures  $\rho_X, \mu_Y, \mu_W$ . In the next section, we show that  
 144 this leads to an *explicitly computable* (or algorithmic) RIE, which we conjecture to be optimal as  
 145  $N \rightarrow \infty$ , in the sense that its performance matches the one of the Oracle estimator.

146 Now we remark that the Oracle estimator is not only optimal within the rotation invariant class but  
 147 is also Bayesian optimal. From the Bayesian estimation point of view, one wishes to minimize the  
 148 average mean squared error (MSE)  $\text{MSE}_{\hat{\mathbf{X}}} \equiv \frac{1}{N} \mathbb{E} \|\mathbf{X} - \hat{\mathbf{X}}(\mathcal{S})\|_F^2$ , where the expectation is over  
 149  $\mathbf{X}, \mathbf{Y}, \mathbf{W}$ , and  $\hat{\mathbf{X}}(\mathcal{S})$  is an estimator of  $\mathbf{X}$ . The MSE is minimized for  $\hat{\mathbf{X}}^*(\mathcal{S}) = \mathbb{E}[\mathbf{X}|\mathcal{S}]$  which is  
 150 the posterior mean. Therefore, the posterior mean estimator has the minimum MSE (MMSE) among  
 151 all possible estimators, in particular  $\text{MSE}_{\hat{\mathbf{X}}^*} \leq \text{MSE}_{\Xi_X^*}$  for any  $N$ . In section A.1, we show that, for  
 152 rotational invariant priors, the posterior mean estimator is inside the RIE class. Thus, since  $\Xi_X^*(\mathcal{S})$  is  
 153 optimum among the RIE class  $\text{MSE}_{\Xi_X^*} \leq \text{MSE}_{\hat{\mathbf{X}}^*}$ . Therefore, we conclude that the Oracle estimator  
 154 (3) is Bayesian optimal in the sense that  $\text{MSE}_{\Xi_X^*} = \text{MSE}_{\hat{\mathbf{X}}^*} = \text{MMSE}$ .

## 155 2.2.2 RIE class for $\mathbf{Y}$

156 Estimators for  $\mathbf{Y}$  from the rotation invariant class are denoted  $\Xi_Y(\mathcal{S})$ , and are constructed as:

$$\Xi_Y(\mathcal{S}) = \mathbf{U}_S \left[ \text{diag}(\xi_{y_1}, \dots, \xi_{y_N}) \mid \mathbf{0}_{N \times (M-N)} \right] \mathbf{V}_S^\top \quad (4)$$

157 where  $\xi_{y_1}, \dots, \xi_{y_N}$  are the singular values of the estimator.

158 Let the SVD of  $\mathbf{Y}$  be  $\mathbf{Y} = \sum_{i=1}^N \sigma_i \mathbf{y}_i^{(l)} \mathbf{y}_i^{(r)\top}$  with  $\mathbf{y}_i^{(l)} \in \mathbb{R}^N, \mathbf{y}_i^{(r)} \in \mathbb{R}^M$  the left and right singular  
 159 vectors of  $\mathbf{Y}$ . To derive an *Oracle estimator*, we proceed as above. Expanding the error, we have:

$$\frac{1}{N}\|\mathbf{Y} - \Xi_Y(\mathcal{S})\|_F^2 = \frac{1}{N} \sum_{i=1}^N \sigma_i^2 + \frac{1}{N} \sum_{i=1}^N \xi_{y_i}^2 - \frac{2}{N} \sum_{i=1}^N \xi_{y_i} \sum_{j=1}^N \sigma_j (\mathbf{u}_i^\top \mathbf{y}_j^{(l)}) (\mathbf{v}_i^\top \mathbf{y}_j^{(r)})$$

160 where  $\mathbf{v}_i$ 's are columns of  $\mathbf{V}_S$ . Minimizing over  $\xi_{y_i}$ 's, we find the optimum among the RIE class:

$$\Xi_Y^*(\mathcal{S}) = \sum_{i=1}^N \xi_{y_i}^* \mathbf{u}_i \mathbf{v}_i^\top, \quad \xi_{y_i}^* = \sum_{j=1}^N \sigma_j (\mathbf{u}_i^\top \mathbf{y}_j^{(l)}) (\mathbf{v}_i^\top \mathbf{y}_j^{(r)}) = \mathbf{u}_i^\top \mathbf{Y} \mathbf{v}_i \quad (5)$$

161 Expression (5) defines the Oracle estimator which requires the knowledge of signal matrix  $\mathbf{Y}$ . Like  
 162 for the case of  $\mathbf{X}$ , in the large  $N$  limit we can derive the optimal singular values  $(\xi_{y_i}^*)_{1 \leq i \leq N}$  in terms  
 163 of the singular values of observation matrix and knowledge of the measures  $\rho_X, \mu_W$ . This leads to  
 164 an *explicitly computable* (or algorithmic) RIE, which is conjectured to be optimal as  $N \rightarrow \infty$ , in the  
 165 sense that it has the same performance as the Oracle estimator. Note that unlike the estimator for  $\mathbf{X}$ ,  
 166 we do not need the knowledge of  $\mu_Y$ .

167 In section A.2, we show that for bi-rotationally invariant priors the posterior mean estimator  $\hat{\mathbf{Y}}^*(\mathcal{S}) =$   
 168  $\mathbb{E}[\mathbf{Y}|\mathcal{S}]$  belongs to the RIE class, which (by similar arguments to the case of  $\mathbf{X}$ ) implies that the  
 169 Oracle estimator (5) is Bayesian optimal.

### 3 Algorithmic RIEs for the matrix factors

In this section, we present our explicit RIEs for  $\mathbf{X}$ ,  $\mathbf{Y}$  and the corresponding algorithm. We conjecture that their performance matches the one of Oracles estimators in the large  $N$  limit and they are therefore Bayesian optimal in this limit. Let us first give a brief reminder on useful transforms in random matrix theory.

#### 3.1 Preliminaries on transforms in random matrix theory

For a probability density function  $\rho(x)$  on  $\mathbb{R}$ , the *Stieltjes* (or *Cauchy*) transform is defined as

$$\mathcal{G}_\rho(z) = \int_{\mathbb{R}} \frac{1}{z-x} \rho(x) dx \quad \text{for } z \in \mathbb{C} \setminus \text{supp}(\rho)$$

By Plemelj formulae we have for  $x \in \mathbb{R}$ ,

$$\lim_{\epsilon \rightarrow 0^+} \mathcal{G}_\rho(x - i\epsilon) = \pi H[\rho](x) + \pi i \rho(x) \quad (6)$$

with  $H[\rho](x) = \text{p.v.} \frac{1}{\pi} \int_{\mathbb{R}} \frac{\rho(t)}{x-t} dt$  the *Hilbert* transform of  $\rho$  (here p.v. stands for "principal value").

Denoting the inverse of  $\mathcal{G}_\rho(z)$  by  $\mathcal{G}_\rho^{-1}(z)$ , the *R-transform* of  $\rho$  is defined as [43]:

$$\mathcal{R}_\rho(z) = \mathcal{G}_\rho^{-1}(z) - \frac{1}{z}$$

For a probability density function  $\mu$  with support contained in  $[-K, K]$  with  $K > 0$ , we define a generating function of (even) moments  $\mathcal{M}_\mu : [0, K^{-2}] \rightarrow \mathbb{R}_+$  as  $\mathcal{M}_\mu(z) = \int \frac{1}{1-t^2 z} \mu(t) dt - 1$ . For

$\alpha \in (0, 1]$ , define  $T^{(\alpha)}(z) = (\alpha z + 1)(z + 1)$ , and  $\mathcal{H}_\mu^{(\alpha)}(z) = z T^{(\alpha)}(\mathcal{M}_\mu(z))$ . The *rectangular R-transform* with aspect ratio  $\alpha$  is defined as [44]:

$$\mathcal{C}_\mu^{(\alpha)}(z) = T^{(\alpha)-1}\left(\frac{z}{\mathcal{H}_\mu^{(\alpha)-1}(z)}\right)$$

#### 3.2 Explicit RIE for $\mathbf{X}$

The RIE for  $\mathbf{X}$  is constructed as  $\widehat{\Xi}_X^*(\mathbf{S}) = \sum_{i=1}^N \widehat{\xi}_{x_i}^* \mathbf{u}_i \mathbf{u}_i^\top$  with eigenvalues  $(\widehat{\xi}_{x_i}^*)_{1 \leq i \leq N}$ :

$$\widehat{\xi}_{x_i}^* = \frac{1}{2\kappa\pi\bar{\mu}_S(\gamma_i)} \text{Im} \lim_{z \rightarrow \gamma_i - i0^+} \left\{ \frac{1}{\zeta_3} \left[ \mathcal{G}_{\rho_X} \left( \sqrt{\frac{z - \zeta_1}{\kappa\zeta_3}} \right) + \mathcal{G}_{\rho_X} \left( -\sqrt{\frac{z - \zeta_1}{\kappa\zeta_3}} \right) \right] \right\} \quad (7)$$

where  $\gamma_i$  is the  $i$ -th singular value of  $\mathbf{S}$ ,  $\bar{\mu}_S$  is the symmetrized limiting ESD of  $\mathbf{S}$ , and

$$\zeta_1 = \frac{1}{\mathcal{G}_{\bar{\mu}_S}(z)} \mathcal{C}_{\mu_W}^{(\alpha)} \left( \mathcal{G}_{\bar{\mu}_S}(z) \left[ \alpha \mathcal{G}_{\bar{\mu}_S}(z) + \frac{1-\alpha}{z} \right] \right) \quad (8)$$

and  $\zeta_3$  satisfies<sup>1</sup>:

$$(z - \zeta_1) \mathcal{G}_{\bar{\mu}_S}(z) - 1 = \mathcal{C}_{\mu_Y}^{(\alpha)} \left( \frac{1}{\zeta_3} \left[ \alpha \mathcal{G}_{\bar{\mu}_S}(z) + \frac{1-\alpha}{z} \right] [(z - \zeta_1) \mathcal{G}_{\bar{\mu}_S}(z) - 1] \right) \quad (9)$$

**Remark 2.** If  $\rho_X$  is a symmetric measure,  $\rho_X(x) = \rho_X(-x)$ , then  $\mathcal{G}_{\rho_X}(-z) = -\mathcal{G}_{\rho_X}(z)$ . This implies that the optimal eigenvalues  $(\widehat{\xi}_{x_i}^*)_{1 \leq i \leq N}$  in (7) are all zero, and  $\widehat{\Xi}_X^*(\mathbf{S}) = \mathbf{0}$ , see figure 4.

##### 3.2.1 An estimator for $\mathbf{X}^2$

It is interesting to note that we can construct a RIE for  $\mathbf{X}^2$  as  $\widehat{\Xi}_{X^2}^*(\mathbf{S}) = \sum_{i=1}^N \widehat{\xi}_{x^2_i}^* \mathbf{u}_i \mathbf{u}_i^\top$  with eigenvalues  $(\widehat{\xi}_{x^2_i}^*)_{1 \leq i \leq N}$ :

$$\widehat{\xi}_{x^2_i}^* = \frac{1}{\kappa\pi\bar{\mu}_S(\gamma_i)} \text{Im} \lim_{z \rightarrow \gamma_i - i0^+} \frac{z - \zeta_1}{\zeta_3} \mathcal{G}_{\bar{\mu}_S}(z) - \frac{1}{\zeta_3} \quad (10)$$

with  $\zeta_1, \zeta_3$  as in (8), (9). Note that,  $\zeta_1, \zeta_3$  can be evaluated using the observation matrix and the knowledge of  $\mu_Y, \mu_W$ , and therefore this time the statistician *does not need to know the prior of  $\mathbf{X}$* . Furthermore, assuming that  $\mathbf{X}$  is positive semi-definite (PSD), we can construct a sub-optimal RIE

for  $\mathbf{X}$  by using  $\sqrt{\widehat{\xi}_{x^2_i}^*}$  for the eigenvalues of the estimator.

<sup>1</sup> $\zeta_1, \zeta_3$  are the only parameters which appear in the final estimator. However, in derivation of the RIE, we have defined other parameters which do not appear in the final estimator and we omit them here.

### 197 3.2.2 Case of Gaussian $Y, W$

198 If  $Y, W$  have i.i.d. Gaussian entries with variance  $1/N$ , then  $\mathcal{C}_{\mu_Y}^{(\alpha)}(z) = \mathcal{C}_{\mu_W}^{(\alpha)}(z) = z/\alpha$ . Consequently,  
 199  $\zeta_1, \zeta_3$  can easily be computed to be  $\zeta_1 = \zeta_3 = \mathcal{G}_{\bar{\mu}_S}(z) + (1-\alpha)/(\alpha z)$ , thus the estimator (7) can be  
 200 evaluated from the observation matrix. In particular, the estimator (10) simplifies to:

$$\widehat{\xi}_{x^2 i}^* = \frac{1}{\kappa} \left[ -1 + \frac{1}{\alpha \left( \pi^2 \bar{\mu}_S(\gamma_i)^2 + (\pi \mathbf{H}[\bar{\mu}_S](\gamma_i) + \frac{1-\alpha}{\alpha \gamma_i})^2 \right)} \right] \quad (11)$$

### 201 3.3 Explicit RIE for $Y$

202 Our explicit RIE for  $Y$  is constructed as  $\widehat{\Xi}_Y^*(S) = \sum_{i=1}^N \widehat{\xi}_{y_i}^* \mathbf{u}_i \mathbf{v}_i^\top$  with singular values  $(\widehat{\xi}_{y_i}^*)_{1 \leq i \leq N}$ :

$$\widehat{\xi}_{y_i}^* = \frac{1}{\sqrt{\kappa}} \frac{1}{\pi \bar{\mu}_S(\gamma_i)} \operatorname{Im} \lim_{z \rightarrow \gamma_i - i0^+} q_4 \quad (12)$$

203 where  $\gamma_i$  is the  $i$ -th singular value of  $S$ , and  $q_4$  is the solution to the following system of equations <sup>2</sup>:

$$\begin{cases} \beta_1 = \frac{\mathcal{C}_{\mu_W}^{(\alpha)}(q_1 q_2)}{q_1} + \frac{1}{2} \sqrt{\frac{q_3}{q_1}} \left( \mathcal{R}_{\rho_X}(q_4 + \sqrt{q_1 q_3}) - \mathcal{R}_{\rho_X}(q_4 - \sqrt{q_1 q_3}) \right) \\ \beta_4 = \frac{1}{2} \left( \mathcal{R}_{\rho_X}(q_4 + \sqrt{q_1 q_3}) + \mathcal{R}_{\rho_X}(q_4 - \sqrt{q_1 q_3}) \right) \\ q_1 = \mathcal{G}_{\bar{\mu}_S}(z), \quad q_2 = \alpha \mathcal{G}_{\bar{\mu}_S}(z) + (1-\alpha) \frac{1}{z} \\ q_3 = \frac{(z-\beta_1)^2}{\beta_4^2} \mathcal{G}_{\bar{\mu}_S}(z) - \frac{z-\beta_1}{\beta_4^2}, \quad q_4 = \frac{z-\beta_1}{\beta_4} \mathcal{G}_{\bar{\mu}_S}(z) - \frac{1}{\beta_4} \end{cases} \quad (13)$$

204 Similarly to the estimator derived for  $X$ , if  $\rho_X$  is a symmetric measure then the optimal singular  
 205 values for the estimator of  $Y$  are all zero, see remark 5.

206 If  $X$  is a shifted Wigner matrix, i.e.  $X = F + cI$  with  $F = F^\top \in \mathbb{R}^{N \times N}$  having i.i.d. Gaussian  
 207 entries with variance  $1/N$  and  $c \neq 0$  a real number, then  $\mathcal{R}_{\rho_X}(z) = z + c$ . Moreover, if  $W$  is  
 208 Gaussian matrix with variance  $1/N$ , then the set of equations (13) simplifies to a great extent, and we  
 209 can compute  $q_4$  analytically in terms of  $\mathcal{G}_{\bar{\mu}_S}(z)$ , see section D.4.

### 210 3.4 Algorithmic nature of the RIEs

211 The explicit RIEs (7) and (12) proposed in this section, provide spectral algorithms to estimate the  
 212 matrix factors from the data matrix (and the priors). An essential ingredient that must be extracted  
 213 from the data matrix is  $\mathcal{G}_{\bar{\mu}_S}(z)$ . This quantity can be approximated from the observation matrix using  
 214 Cauchy kernel method introduced in [45](see section 19.5.2), from which  $\bar{\mu}_S(\cdot)$  can be approximated  
 215 using (6). Therefore, given an observation matrix  $S$ , the spectral algorithm proceeds as follows:

- 216 1. Compute the SVD of  $S$ .
- 217 2. Approximate  $\mathcal{G}_{\bar{\mu}_S}(z)$  from the singular values of  $S$ .
- 218 3. Construct the RIEs for  $X, Y$  as proposed in paragraphs 3.2, 3.3.

## 219 4 Numerical results

### 220 4.1 Performance of RIE for $X$

221 We consider the case where  $Y, W$  both have i.i.d. Gaussian entries of variance  $1/N$ , and  $X$  is  
 222 a Wishart matrix,  $X = \mathbf{H}\mathbf{H}^\top$  with  $\mathbf{H} \in \mathbb{R}^{N \times 4N}$  having i.i.d. Gaussian entries of variance  $1/N$ .  
 223 For various SNRs, we examine the performance of two proposed estimators, the RIE (7), and the  
 224 square-root of the estimator (10) (since  $X$  is PSD), which is sub-optimal. In figure 1, the MSEs  
 225 of these algorithmic estimators are compared with the one of Oracle estimator (3). We see that the  
 226 average performance of the algorithmic RIE  $\widehat{\Xi}_X^*(S)$  is very close to the (optimal) Oracle estimator  
 227  $\Xi_X^*(S)$  (relative errors are small and provided in the appendices) and we believe that the slight  
 228 mismatch is due to the numerical approximations and finite-size effects. Note that, although the  
 229 estimator  $\sqrt{\widehat{\Xi}_{X^2}^*(S)}$  is sub-optimal, it does not use any prior knowledge of  $X$ . For more examples,  
 230 details of the numerical experiments and the relative error of the estimators, we refer to section C.3.

<sup>2</sup>Like the case for  $X$ , we omit some of the parameters which do not appear in the final estimator.

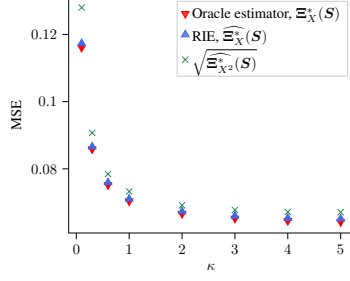

Figure 1: MSE of estimating  $\mathbf{X}$ . MSE is normalized by the norm of the signal,  $\|\mathbf{X}\|_F^2$ .  $\mathbf{X}$  is a Wishart matrix with aspect ratio  $1/4$ ,  $\mathbf{X} = \mathbf{H}\mathbf{H}^\top$  with  $\mathbf{H} \in \mathbb{R}^{N \times 4N}$  having i.i.d. Gaussian entries of variance  $1/N$ . Both  $\mathbf{Y}$  and  $\mathbf{W}$  are  $N \times M$  matrices with i.i.d. Gaussian entries of variance  $1/N$ . RIE is applied to  $N = 2000$ ,  $M = 4000$ , and the results are averaged over 10 runs (error bars are invisible).

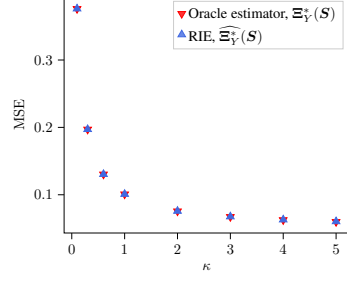

Figure 2: MSE of estimating  $\mathbf{Y}$ . MSE is normalized by the norm of the signal,  $\|\mathbf{Y}\|_F^2$ .  $\mathbf{Y}$  has uniform spectral density,  $\mathcal{U}([1, 3])$ .  $\mathbf{X}$  is a shifted Wigner matrix with  $c = 3$ , and  $\mathbf{W}$  is a  $N \times M$  matrix with i.i.d. Gaussian entries of variance  $1/N$ . RIE is applied to  $N = 2000$ ,  $M = 4000$ , and the results are averaged over 10 runs (error bars are invisible).

## 4.2 Performance of RIE for $\mathbf{Y}$

We consider the case where  $\mathbf{W}$  has i.i.d. Gaussian entries of variance  $1/N$ , and  $\mathbf{X}$  is a shifted Wigner matrix with  $c = 3$ . Matrix  $\mathbf{Y}$  is constructed as  $\mathbf{Y} = \mathbf{U}_Y \mathbf{\Sigma} \mathbf{V}_Y^\top$  with  $\mathbf{U}_Y \in \mathbb{R}^{N \times N}$ ,  $\mathbf{V}_Y \in \mathbb{R}^{M \times M}$  are Haar distributed, and the singular values are generated independently from the uniform distribution on  $[1, 3]$ . MSEs of the RIE (12) and the Oracle estimator (5) are illustrated in figure 2. We see that the performance of the algorithmic RIE  $\widehat{\Xi}_Y^*(S)$  is very close to the optimal estimator  $\Xi_Y^*(S)$ .

**Non-rotational invariant prior** In another example, which we omit here, with the same settings for  $\mathbf{X}$ ,  $\mathbf{W}$ , we consider the case where  $\mathbf{Y}$  is a sparse matrix with entries distributed according to Bernoulli-Rademacher prior. The RIE is not optimal in this setting (since the prior is not bi-rotational invariant), however applying a simple thresholding function on the matrix constructed by RIE yields an estimate with lower MSE. This observation suggests that for the case of general priors, the RIEs can provide a spectral initialization for more efficient estimators. For more details and examples, see section D.4.

## 4.3 Comparing RIEs of matrix factorization and denoising

The proposed RIEs, namely (7) and (12), simplify greatly when the matrices  $\mathbf{W}$ ,  $\mathbf{Y}$  are Gaussian, and  $\mathbf{X}$  is a shifted Wigner matrix. We perform experiments with these priors, where for a given observation matrix  $\mathbf{S}$ , we look at the RIEs of  $\mathbf{X}$ ,  $\mathbf{Y}$  for the *MF problem*, and simultaneously at the RIE of the product  $\mathbf{X}\mathbf{Y}$  as a whole for the *denoising problem* with formulas introduced in [18] (which can also be obtained by taking  $\mathbf{X}$  to be the identity matrix, see section D.3.1). Figure 3 illustrates these experiments. In particular the MSE of the denoising-RIE matches well the one of the associated Oracle estimator, and as expected is lower than the MSE of the product of MF-RIEs.

## 5 Derivation of the explicit RIEs

In this section, we sketch the derivation of our explicit RIE for  $\mathbf{X}$ . The RIE for  $\mathbf{Y}$  is derived similarly, but requires more involved analysis and is presented in section D. For simplicity, we take the SNR parameter in (1) to be 1, so the model is  $\mathbf{S} = \mathbf{X}\mathbf{Y} + \mathbf{W}$ . The optimal eigenvalues are constructed as  $\xi_{xi}^* = \sum_{j=1}^N \lambda_j (\mathbf{u}_i^\top \mathbf{x}_j)^2$ . We assume that in the large  $N$  limit,  $\xi_{xi}^*$  can be approximated by its expectation and we introduce

$$\widehat{\xi}_{xi}^* = \sum_{j=1}^N \lambda_j \mathbb{E}[(\mathbf{u}_i^\top \mathbf{x}_j)^2] \quad (14)$$

where the expectation is over the (left) singular vectors of the observation matrix  $\mathbf{S}$ . Therefore, to compute these eigenvalues, we need to find the mean squared overlap  $\mathbb{E}[(\mathbf{u}_i^\top \mathbf{x}_j)^2]$  between

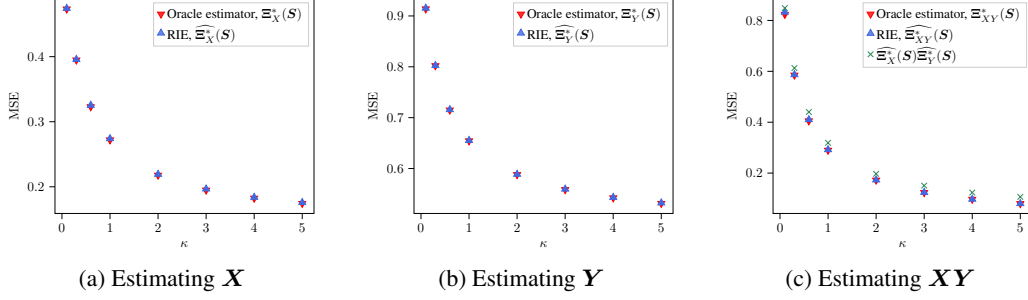

Figure 3: MSE of factorization problem. MSE is normalized by the norm of the signal.  $\mathbf{X}$  is a shifted Wigner matrix with  $c = 1$ , and both  $\mathbf{Y}$  and  $\mathbf{W}$  are  $N \times M$  matrices with i.i.d. Gaussian entries of variance  $1/N$ . RIE is applied to  $N = 2000$ ,  $M = 4000$ . In each run, the observation matrix  $\mathbf{S}$  is generated according to (1), and the factors  $\mathbf{X}$ ,  $\mathbf{Y}$  are estimated simultaneously from  $\mathbf{S}$ . Results are averaged over 10 runs (error bars are invisible).

eigenvectors of  $\mathbf{X}$  and singular vectors of  $\mathbf{S}$ . In what follows, we will see that (a rescaling of) this quantity can be expressed in terms of  $i$ -th singular value of  $\mathbf{S}$  and  $j$ -th eigenvector of  $\mathbf{X}$  (and the limiting measures, indeed). Thus, we will use the notation  $O_X(\gamma_i, \lambda_j) := N\mathbb{E}\left[(\mathbf{u}_i^\top \mathbf{x}_j)^2\right]$  in the following. In the next section, we discuss how the overlap can be computed from the resolvent of the "Hermitized" version of  $\mathbf{S}$ .

### 5.1 Relation between overlap and resolvent

Construct the matrix  $\mathcal{S} \in \mathbb{R}^{(N+M) \times (N+M)}$  from the observation matrix:

$$\mathcal{S} = \begin{bmatrix} \mathbf{0}_{N \times N} & \mathbf{S} \\ \mathbf{S}^\top & \mathbf{0}_{M \times M} \end{bmatrix}$$

By Theorem 7.3.3 in [46],  $\mathcal{S}$  has the following eigen-decomposition:

$$\mathcal{S} = \begin{bmatrix} \hat{\mathbf{U}}_S & \hat{\mathbf{U}}_S & \mathbf{0} \\ \hat{\mathbf{V}}_S^{(1)} & -\hat{\mathbf{V}}_S^{(1)} & \mathbf{V}_S^{(2)} \end{bmatrix} \begin{bmatrix} \mathbf{\Gamma}_N^+ & \mathbf{0} & \mathbf{0} \\ \mathbf{0} & -\mathbf{\Gamma}_N^- & \mathbf{0} \\ \mathbf{0} & \mathbf{0} & \mathbf{0} \end{bmatrix} \begin{bmatrix} \hat{\mathbf{U}}_S & \hat{\mathbf{U}}_S & \mathbf{0} \\ \hat{\mathbf{V}}_S^{(1)} & -\hat{\mathbf{V}}_S^{(1)} & \mathbf{V}_S^{(2)} \end{bmatrix}^\top \quad (15)$$

with  $\mathbf{V}_S = \begin{bmatrix} \mathbf{V}_S^{(1)} & \mathbf{V}_S^{(2)} \end{bmatrix}$  in which  $\mathbf{V}_S^{(1)} \in \mathbb{R}^{M \times N}$ . And,  $\hat{\mathbf{V}}_S^{(1)} = \frac{1}{\sqrt{2}}\mathbf{V}_S^{(1)}$ ,  $\hat{\mathbf{U}}_S = \frac{1}{\sqrt{2}}\mathbf{U}_S$ . Eigenvalues of  $\mathcal{S}$  are signed singular values of  $\mathbf{S}$ , therefore the limiting eigenvalue distribution of  $\mathcal{S}$  (ignoring zero eigenvalues) is the same as the limiting symmetrized singular value distribution of  $\mathbf{S}$ . Define the resolvent of  $\mathcal{S}$ ,

$$\mathbf{G}_S(z) = (z\mathbf{I} - \mathcal{S})^{-1}$$

We assume that as  $N \rightarrow \infty$  and  $z$  is not too close to the real axis, the matrix  $\mathbf{G}_S(z)$  concentrates around its mean. Consequently, the value of  $\mathbf{G}_S(z)$  becomes uncorrelated with the particular realization of  $\mathbf{S}$ . Specifically, as  $N \rightarrow \infty$ ,  $\mathbf{G}_S(z)$  converges to a deterministic matrix for any fixed value of  $z \in \mathbb{C} \setminus \mathbb{R}$  (independent of  $N$ ). Denote the eigenvectors of  $\mathcal{S}$  by  $\mathbf{s}_i \in \mathbb{R}^{M+N}$ ,  $i = 1, \dots, M+N$ . For  $z = x - i\epsilon$  with  $x \in \mathbb{R}$  and small  $\epsilon$ , we have:

$$\mathbf{G}_S(x - i\epsilon) = \sum_{k=1}^{2N} \frac{x + i\epsilon}{(x - \tilde{\gamma}_k)^2 + \epsilon^2} \mathbf{s}_k \mathbf{s}_k^\top + \frac{x + i\epsilon}{x^2 + \epsilon^2} \sum_{k=2N+1}^{N+M} \mathbf{s}_k \mathbf{s}_k^\top$$

where  $\tilde{\gamma}_k$  are the eigenvalues of  $\mathcal{S}$ , which are in fact the (signed) singular values of  $\mathbf{S}$ ,  $\tilde{\gamma}_1 = \gamma_1, \dots, \tilde{\gamma}_N = \gamma_N, \tilde{\gamma}_{N+1} = -\gamma_1, \dots, \tilde{\gamma}_{2N} = -\gamma_N$ .

Define the vectors  $\tilde{\mathbf{x}}_i = [\mathbf{x}_i^\top, \mathbf{0}_M^\top]^\top$  for  $\mathbf{x}_i$  eigenvectors of  $\mathbf{X}$ . We have

$$\tilde{\mathbf{x}}_i^\top (\text{Im } \mathbf{G}_S(x - i\epsilon)) \tilde{\mathbf{x}}_i = \sum_{k=1}^{2N} \frac{\epsilon}{(x - \tilde{\gamma}_k)^2 + \epsilon^2} (\tilde{\mathbf{x}}_i^\top \mathbf{s}_k)^2 + \frac{\epsilon}{x^2 + \epsilon^2} \sum_{k=2N+1}^{N+M} (\tilde{\mathbf{x}}_i^\top \mathbf{s}_k)^2 \quad (16)$$

Given the structure of  $\mathbf{s}_k$ 's in (15),  $(\tilde{\mathbf{x}}_i^\top \mathbf{s}_j)^2 = \frac{1}{2}(\mathbf{x}_i^\top \mathbf{u}_j)^2 = (\tilde{\mathbf{x}}_i^\top \mathbf{s}_{j+N})^2$  for  $1 \leq j \leq N$ , and the second sum in (16) is zero. We assume that in the limit of large  $N$  this quantity concentrates on



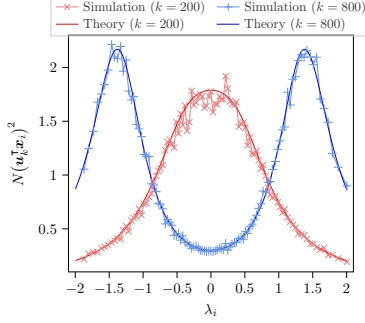

Figure 4: Comparison of the theoretical prediction (20) of the rescaled overlap with the numerical simulation. The rescaled overlap between 200-th and 800-th left singular vector of  $\mathbf{S}$  and the eigenvectors of  $\mathbf{X}$  is illustrated.  $\mathbf{X} = \mathbf{X}^\top \in \mathbb{R}^{N \times N}$  has i.i.d. Gaussian entries with variance  $1/\sqrt{N}$  and is fixed. Both  $\mathbf{Y}$  and  $\mathbf{Z}$  are  $N \times M$  matrices with i.i.d. Gaussian entries of variance  $1/N$ . The simulation results are average of 1000 experiments with fixed  $\mathbf{X}$ , and  $N = 1000, M = 2000$ . Some of the simulation points are dropped for clarity.

One can see that the overlap is an even function of eigenvalues  $\lambda_i$ , so the optimal eigenvalues  $\xi_{x_i}^* = \sum_{j=1}^N \lambda_j (\mathbf{u}_i^\top \mathbf{x}_j)^2$  are all zero, as discussed in remark 2.

282  $O_X(\gamma_j, \lambda_i)$  and depends only on the singular values and eigenvalue pairs  $(\gamma_j, \lambda_i)$ . We thus have:

$$\tilde{\mathbf{x}}_i^\top (\text{Im } \mathbf{G}_S(x - i\epsilon)) \tilde{\mathbf{x}}_i \xrightarrow{N \rightarrow \infty} \int_{\mathbb{R}} \frac{\epsilon}{(x-t)^2 + \epsilon^2} O_X(t, \lambda_i) \bar{\mu}_S(t) dt \quad (17)$$

283 where the overlap function  $O_X(t, \lambda_i)$  is extended (continuously) to arbitrary values within the  
 284 support of  $\bar{\mu}_S$  (the symmetrized limiting singular value distribution of  $\mathbf{S}$ ) with the property that  
 285  $O_X(t, \lambda_i) = O_X(-t, \lambda_i)$  for  $t \in \text{supp}(\mu_S)$ . Sending  $\epsilon \rightarrow 0$ , we find

$$\tilde{\mathbf{x}}_i^\top (\text{Im } \mathbf{G}_S(x - i\epsilon)) \tilde{\mathbf{x}}_i \rightarrow \pi \bar{\mu}_S(x) O_X(x, \lambda_i) \quad (18)$$

286 This is a crucial relation as it allows us to study the overlap by means of the resolvent of  $\mathbf{S}$ . In the  
 287 next section, we establish a connection between this resolvent and the signal  $\mathbf{X}$ , which enables us to  
 288 determine the optimal eigenvalues values  $\xi_{x_i}^*$  in terms of the singular values of  $\mathbf{S}$ .

## 289 5.2 Resolvent relation

290 To derive the resolvent relation between  $\mathbf{S}$  and  $\mathbf{X}$ , we fix the matrix  $\mathbf{X}$  and consider the model

$$\mathbf{S} = \mathbf{X} \mathbf{U}_1 \mathbf{Y} \mathbf{V}_1^\top + \mathbf{U}_2 \mathbf{W} \mathbf{V}_2^\top$$

291 with  $\mathbf{Y}, \mathbf{W} \in \mathbb{R}^{N \times M}$  fixed matrices with limiting singular value distribution  $\mu_Y, \mu_W$ , and  $\mathbf{U}_1, \mathbf{U}_2 \in$   
 292  $\mathbb{R}^{N \times N}, \mathbf{V}_1, \mathbf{V}_2 \in \mathbb{R}^{M \times M}$  independent random Haar matrices. Indeed, if we substitute the SVD of  
 293 the matrices  $\mathbf{Y}, \mathbf{W}$  in model (1) we find the latter model. Now, the average over the singular vectors  
 294 of  $\mathbf{S}$  (with fixed  $\mathbf{X}$ ) is equivalent to the average over the matrices  $\mathbf{U}_1, \mathbf{U}_2, \mathbf{V}_1, \mathbf{V}_2$ . In section C.1,  
 295 using the Replica trick, we derive the following relation in the limit  $N \rightarrow \infty$ :

$$\langle \mathbf{G}_S(z) \rangle = \begin{bmatrix} \zeta_3^{-1} \mathbf{G}_{X^2} \left( \frac{z - \zeta_1}{\zeta_3} \right) & \mathbf{0} \\ \mathbf{0} & (z - \zeta_2)^{-1} \mathbf{I}_M \end{bmatrix} \quad (19)$$

296 with  $\zeta_1, \zeta_2, \zeta_3$  satisfying set of equations (41).  $\langle \cdot \rangle$  is the expectation w.r.t. the singular vectors of  $\mathbf{S}$   
 297 (or equivalently over  $\mathbf{U}_1, \mathbf{U}_2, \mathbf{V}_1, \mathbf{V}_2$ ), and  $\mathbf{G}_{X^2}$  is the resolvent of  $\mathbf{X}^2$ . As stated earlier, we assume  
 298 that the resolvent  $\mathbf{G}_S(z)$  concentrates in the limit  $N \rightarrow \infty$ , therefore we drop the brackets in the  
 299 following computation.

## 300 5.3 Overlaps and optimal eigenvalues

301 From (18), (19), we find:

$$\begin{aligned} O_X(\gamma, \lambda_i) &\approx \frac{1}{\pi \bar{\mu}_S(\gamma)} \text{Im} \lim_{z \rightarrow \gamma - i0^+} \mathbf{x}_i^\top \zeta_3^{-1} \mathbf{G}_{X^2} \left( \frac{z - \zeta_1}{\zeta_3} \right) \mathbf{x}_i \\ &= \frac{1}{\pi \bar{\mu}_S(\gamma)} \text{Im} \lim_{z \rightarrow \gamma - i0^+} \frac{1}{z - \zeta_1 - \zeta_3 \lambda_i^2} \end{aligned} \quad (20)$$

302 In Fig. 4 we illustrate that the theoretical predictions (20) are in good agreement with numerical  
 303 simulations for a particular case of  $\mathbf{X}$  a Wigner matrix, and  $\mathbf{Y}, \mathbf{W}$  with i.i.d. Gaussian entries.

304 Once we have the overlap, we can compute the optimal eigenvalues to be

$$\hat{\xi}_{x_i}^* \approx \frac{1}{N} \sum_{j=1}^N \lambda_j O_X(\gamma_i, \lambda_j) \approx \frac{1}{\pi \bar{\mu}_S(\gamma_i)} \text{Im} \lim_{z \rightarrow \gamma_i - i0^+} \frac{1}{N} \sum_{j=1}^N \frac{\lambda_j}{z - \zeta_1 - \zeta_3 \lambda_j^2} \quad (21)$$

305 With a bit of algebra, we find the estimator in (7) in the limit  $N \rightarrow \infty$ , see section C.2.

## References

- [1] Ivana Tošić and Pascal Frossard. Dictionary learning. *IEEE Signal Processing Magazine*, 28(2):27–38, 2011.
- [2] Julien Mairal, Jean Ponce, Guillermo Sapiro, Andrew Zisserman, and Francis Bach. Supervised dictionary learning. *Advances in neural information processing systems*, 21, 2008.
- [3] Bruno A Olshausen and David J Field. Emergence of simple-cell receptive field properties by learning a sparse code for natural images. *Nature*, 381(6583):607–609, 1996.
- [4] Bruno A Olshausen and David J Field. Sparse coding with an overcomplete basis set: A strategy employed by v1? *Vision research*, 37(23):3311–3325, 1997.
- [5] Kenneth Kreutz-Delgado, Joseph F Murray, Bhaskar D Rao, Kjersti Engan, Te-Won Lee, and Terrence J Sejnowski. Dictionary learning algorithms for sparse representation. *Neural computation*, 15(2):349–396, 2003.
- [6] Yoshua Bengio, Aaron Courville, and Pascal Vincent. Representation learning: A review and new perspectives. *IEEE transactions on pattern analysis and machine intelligence*, 35(8):1798–1828, 2013.
- [7] Emmanuel J Candès, Xiaodong Li, Yi Ma, and John Wright. Robust principal component analysis? *Journal of the ACM (JACM)*, 58(3):1–37, 2011.
- [8] Amelia Perry, Alexander S Wein, Afonso S Bandeira, and Ankur Moitra. Optimality and sub-optimality of PCA i: Spiked random matrix models. *The Annals of Statistics*, 46(5):2416–2451, 2018.
- [9] Adel Belouchrani, Karim Abed-Meraim, J-F Cardoso, and Eric Moulines. A blind source separation technique using second-order statistics. *IEEE Transactions on signal processing*, 45(2):434–444, 1997.
- [10] Emmanuel J Candès and Terence Tao. The power of convex relaxation: Near-optimal matrix completion. *IEEE Transactions on Information Theory*, 56(5):2053–2080, 2010.
- [11] Emmanuel Candes and Benjamin Recht. Exact matrix completion via convex optimization. *Communications of the ACM*, 55(6):111–119, 2012.
- [12] Charles Stein. Estimation of a covariance matrix. In *39th Annual Meeting IMS, Atlanta, GA, 1975*, 1975.
- [13] Akimichi Takemura. An orthogonally invariant minimax estimator of the covariance matrix of a multivariate normal population. *Tsukuba journal of mathematics*, 8(2):367–376, 1984.
- [14] Joël Bun, Romain Allez, Jean-Philippe Bouchaud, and Marc Potters. Rotational invariant estimator for general noisy matrices. *IEEE Transactions on Information Theory*, 62(12):7475–7490, 2016.
- [15] Joël Bun, Jean-Philippe Bouchaud, and Marc Potters. Cleaning large correlation matrices: tools from random matrix theory. *Physics Reports*, 666:1–109, 2017.
- [16] Florent Benaych-Georges, Jean-Philippe Bouchaud, and Marc Potters. Optimal cleaning for singular values of cross-covariance matrices. *arXiv preprint arXiv:1901.05543*, 2019.
- [17] Emanuele Troiani, Vittorio Erba, Florent Krzakala, Antoine Maillard, and Lenka Zdeborová. Optimal denoising of rotationally invariant rectangular matrices. *arXiv preprint arXiv:2203.07752*, 2022.
- [18] Farzad Pourkamali and Nicolas Macris. Rectangular rotational invariant estimator for general additive noise matrices. *arXiv preprint arXiv:2304.12264*, 2023.
- [19] Alice Guionnet and M Maïda. A fourier view on the R-transform and related asymptotics of spherical integrals. *Journal of functional analysis*, 222(2):435–490, 2005.
- [20] Florent Benaych-Georges. Rectangular R-transform as the limit of rectangular spherical integrals. *Journal of Theoretical Probability*, 24(4):969–987, 2011.
- [21] Jinho Baik, Gérard Ben Arous, and Sandrine Péché. Phase transition of the largest eigenvalue for nonnull complex sample covariance matrices. *Annals of Probability*, pages 1643–1697, 2005.

- [22] Florent Benaych-Georges and Raj Rao Nadakuditi. The eigenvalues and eigenvectors of finite, low rank perturbations of large random matrices. *Advances in Mathematics*, 227(1):494–521, 2011.
- [23] Florent Benaych-Georges and Raj Rao Nadakuditi. The singular values and vectors of low rank perturbations of large rectangular random matrices. *Journal of Multivariate Analysis*, 111:120–135, 2012.
- [24] Mohamad Dia, Nicolas Macris, Florent Krzakala, Thibault Lesieur, Lenka Zdeborová, et al. Mutual information for symmetric rank-one matrix estimation: A proof of the replica formula. *Advances in Neural Information Processing Systems*, 29, 2016.
- [25] Léo Miolane. Fundamental limits of low-rank matrix estimation: the non-symmetric case. *arXiv preprint arXiv:1702.00473*, 2017.
- [26] Marc Lelarge and Léo Miolane. Fundamental limits of symmetric low-rank matrix estimation. *Probability Theory and Related Fields*, 173:859–929, 2019.
- [27] Clément Luneau, Nicolas Macris, and Jean Barbier. High-dimensional rank-one nonsymmetric matrix decomposition: the spherical case. In *2020 IEEE International Symposium on Information Theory (ISIT)*, pages 2646–2651. IEEE, 2020.
- [28] Yoshiyuki Kabashima, Florent Krzakala, Marc Mézard, Ayaka Sakata, and Lenka Zdeborová. Phase transitions and sample complexity in Bayes-optimal matrix factorization. *IEEE Transactions on information theory*, 62(7):4228–4265, 2016.
- [29] Jason T Parker, Philip Schniter, and Volkan Cevher. Bilinear generalized approximate message passing—part i: Derivation. *IEEE Transactions on Signal Processing*, 62(22):5839–5853, 2014.
- [30] Qiuyun Zou, Haochuan Zhang, and Hongwen Yang. Multi-layer bilinear generalized approximate message passing. *IEEE Transactions on Signal Processing*, 69:4529–4543, 2021.
- [31] Jason T Parker, Philip Schniter, and Volkan Cevher. Bilinear generalized approximate message passing—part ii: Applications. *IEEE Transactions on Signal Processing*, 62(22):5854–5867, 2014.
- [32] Antoine Maillard, Florent Krzakala, Marc Mézard, and Lenka Zdeborová. Perturbative construction of mean-field equations in extensive-rank matrix factorization and denoising. *Journal of Statistical Mechanics: Theory and Experiment*, 2022(8):083301, 2022.
- [33] Jean Barbier and Nicolas Macris. Statistical limits of dictionary learning: random matrix theory and the spectral replica method. *Physical Review E*, 106(2):024136, 2022.
- [34] Christopher M Bishop. Variational principal components. 1999.
- [35] Yew Jin Lim and Yee Whye Teh. Variational Bayesian approach to movie rating prediction. In *Proceedings of KDD cup and workshop*, volume 7, pages 15–21, 2007.
- [36] Alexander Ilin and Tapani Raiko. Practical approaches to principal component analysis in the presence of missing values. *The Journal of Machine Learning Research*, 11:1957–2000, 2010.
- [37] Shinichi Nakajima, Masashi Sugiyama, S Derin Babacan, and Ryota Tomioka. Global analytic solution of fully-observed variational bayesian matrix factorization. *The Journal of Machine Learning Research*, 14(1):1–37, 2013.
- [38] Salma Tarmoun, Guilherme Franca, Benjamin D Haeffele, and Rene Vidal. Understanding the dynamics of gradient flow in overparameterized linear models. In *International Conference on Machine Learning*, pages 10153–10161. PMLR, 2021.
- [39] Antoine Bodin and Nicolas Macris. Gradient flow on extensive-rank positive semi-definite matrix denoising. *arXiv preprint arXiv:2303.09474*, 2023.
- [40] Daniel D Lee and H Sebastian Seung. Learning the parts of objects by non-negative matrix factorization. *Nature*, 401(6755):788–791, 1999.
- [41] Marco Mondelli and Ramji Venkataramanan. Approximate message passing with spectral initialization for generalized linear models. In *International Conference on Artificial Intelligence and Statistics*, pages 397–405. PMLR, 2021.
- [42] Andrea Montanari and Ramji Venkataramanan. Estimation of low-rank matrices via approximate message passing. *The Annals of Statistics*, 49(1), 2021.

- 407 [43] James A Mingo and Roland Speicher. *Free probability and random matrices*, volume 35.  
408 Springer, 2017.
- 409 [44] Florent Benaych-Georges. Rectangular random matrices, related convolution. *Probability*  
410 *Theory and Related Fields*, 144:471–515, 2009.
- 411 [45] Marc Potters and Jean-Philippe Bouchaud. *A First Course in Random Matrix Theory: For*  
412 *Physicists, Engineers and Data Scientists*. Cambridge University Press, 2020.
- 413 [46] Roger A Horn and Charles R Johnson. *Matrix analysis*. Cambridge university press, 2012.
- 414 [47] Jean Zinn-Justin. *Quantum field theory and critical phenomena*, volume 171. Oxford university  
415 press, 2021.
- 416 [48] Dennis S Bernstein. Matrix mathematics. In *Matrix Mathematics*. Princeton university press,  
417 2009.
- 418 [49] Harish-Chandra. Differential operators on a semisimple lie algebra. *American Journal of*  
419 *Mathematics*, pages 87–120, 1957.
- 420 [50] Alice Guionnet and Jonathan Husson. Asymptotics of k dimensional spherical integrals and  
421 applications. *ALEA*, 19:769–797, 2022.

## 422 A Posterior mean estimator is in the RIE class

423 In this section, we show that for rotational invariant priors, the posterior mean estimator is inside the  
 424 RIE class. For each of the estimators of  $\mathbf{X}, \mathbf{Y}$ , we present an equivalent definition of the RIE, then  
 425 we show that posterior mean estimator satisfies this definition.

### 426 A.1 X Estimator

427 **Lemma 1.** *Given the observation matrix  $\mathbf{S}$ , let  $\hat{\mathbf{X}}(\mathbf{S})$  be an estimator of  $\mathbf{X}$ . Then  $\hat{\mathbf{X}}(\mathbf{S})$  is a RIE if  
 428 and only if for any orthogonal matrices  $\mathbf{U} \in \mathbb{R}^{N \times N}, \mathbf{V} \in \mathbb{R}^{M \times M}$ :*

$$\hat{\mathbf{X}}(\mathbf{U}\mathbf{S}\mathbf{V}^\top) = \mathbf{U}\hat{\mathbf{X}}(\mathbf{S})\mathbf{U}^\top \quad (22)$$

429 *Proof.* If  $\hat{\mathbf{X}}(\mathbf{S})$  is a RIE, then the property (22) clearly follows from the definition (2). Now we turn  
 430 to the converse.

431 Suppose that an estimator  $\hat{\mathbf{X}}(\mathbf{S})$  satisfies (22). First, we show that if the observation matrix is  
 432 diagonal, then the estimator is also diagonal. Consider the observation matrix to be  $\mathbf{S}^{\text{diag}} =$   
 433  $\begin{bmatrix} \text{diag}(\mathbf{s}_1, \dots, \mathbf{s}_N) & \mathbf{0}_{N \times (M-N)} \end{bmatrix}$ . Let  $\mathbf{I}_k^- \in \mathbb{R}^{N \times N}, \mathbf{J}_k^- \in \mathbb{R}^{M \times M}$  be diagonal matrices with  
 434 diagonal entries all one except the  $k$ -th entry which is  $-1$ . Note that for  $1 \leq k \leq N$ , we have  
 435  $\mathbf{S}^{\text{diag}} = \mathbf{I}_k^- \mathbf{S}^{\text{diag}} \mathbf{J}_k^-$ . Moreover, matrices  $\mathbf{I}_k^-, \mathbf{J}_k^-$  are indeed orthogonal. For any  $1 \leq k \leq N$ , from  
 436 the property we have:

$$\hat{\mathbf{X}}(\mathbf{S}^{\text{diag}}) = \hat{\mathbf{X}}(\mathbf{I}_k^- \mathbf{S}^{\text{diag}} \mathbf{J}_k^-) = \mathbf{I}_k^- \hat{\mathbf{X}}(\mathbf{S}^{\text{diag}}) \mathbf{I}_k^- \quad (23)$$

437 This implies that all entries on the  $k$ -th row and  $k$ -th column of  $\hat{\mathbf{X}}(\mathbf{S}^{\text{diag}})$  are zero except the  $k$ -th  
 438 entry on the diagonal. Since this holds for any  $k$ , we conclude that  $\hat{\mathbf{X}}(\mathbf{S}^{\text{diag}})$  is diagonal.

439 Now, for a given general observation matrix with SVD  $\mathbf{S} = \mathbf{U}_S \mathbf{\Gamma} \mathbf{V}_S^\top$ , put  $\mathbf{U} = \mathbf{U}_S^\top, \mathbf{V} = \mathbf{V}_S^\top$  in the  
 440 property (22). We have:

$$\hat{\mathbf{X}}(\mathbf{\Gamma}) = \mathbf{U}_S^\top \hat{\mathbf{X}}(\mathbf{S}) \mathbf{U}_S$$

441 From the argument above, the matrix on the lhs is diagonal. Consequently, the matrix  $\mathbf{U}_S^\top \hat{\mathbf{X}}(\mathbf{S}) \mathbf{U}_S$   
 442 is diagonal which implies that the columns of  $\mathbf{U}_S$  are eigenvectors of  $\hat{\mathbf{X}}(\mathbf{S})$ . Therefore,  $\hat{\mathbf{X}}(\mathbf{S})$  is a  
 443 RIE.  $\square$

444 Now, we prove that the posterior mean estimator  $\hat{\mathbf{X}}^*(\mathbf{S}) = \mathbb{E}[\mathbf{X}|\mathbf{S}]$  has the property (22), and  
 445 therefore belongs to the RIE class. For simplicity, we drop the SNR factor  $\sqrt{\kappa}$ . For any orthogonal  
 446 matrices  $\mathbf{U} \in \mathbb{R}^{N \times N}, \mathbf{V} \in \mathbb{R}^{M \times M}$ , we have:

$$\begin{aligned} \mathbb{E}[\mathbf{X}|\mathbf{U}\mathbf{S}\mathbf{V}^\top] &= \frac{\int d\mathbf{Y} d\tilde{\mathbf{X}} \tilde{\mathbf{X}} P_X(\tilde{\mathbf{X}}) P_Y(\mathbf{Y}) P_W(\mathbf{U}\mathbf{S}\mathbf{V}^\top - \tilde{\mathbf{X}}\mathbf{Y})}{\int d\mathbf{Y} d\tilde{\mathbf{X}} P_X(\tilde{\mathbf{X}}) P_Y(\mathbf{Y}) P_W(\mathbf{U}\mathbf{S}\mathbf{V}^\top - \tilde{\mathbf{X}}\mathbf{Y})} \\ &\stackrel{(a)}{=} \frac{\int d\mathbf{Y} d\tilde{\mathbf{X}} \mathbf{U} \tilde{\mathbf{X}} \mathbf{U}^\top P_X(\tilde{\mathbf{X}}) P_Y(\mathbf{Y}) P_W(\mathbf{U}\mathbf{S}\mathbf{V}^\top - \mathbf{U} \tilde{\mathbf{X}} \mathbf{U}^\top \mathbf{Y})}{\int d\mathbf{Y} d\tilde{\mathbf{X}} P_X(\tilde{\mathbf{X}}) P_Y(\mathbf{Y}) P_W(\mathbf{U}\mathbf{S}\mathbf{V}^\top - \mathbf{U} \tilde{\mathbf{X}} \mathbf{U}^\top \mathbf{Y})} \\ &\stackrel{(b)}{=} \frac{\int d\mathbf{Y} d\tilde{\mathbf{X}} \mathbf{U} \tilde{\mathbf{X}} \mathbf{U}^\top P_X(\tilde{\mathbf{X}}) P_Y(\mathbf{Y}) P_W(\mathbf{U}\mathbf{S}\mathbf{V}^\top - \mathbf{U} \tilde{\mathbf{X}} \mathbf{U}^\top \mathbf{U} \mathbf{Y} \mathbf{V}^\top)}{\int d\mathbf{Y} d\tilde{\mathbf{X}} P_X(\tilde{\mathbf{X}}) P_Y(\mathbf{Y}) P_W(\mathbf{U}\mathbf{S}\mathbf{V}^\top - \mathbf{U} \tilde{\mathbf{X}} \mathbf{U}^\top \mathbf{U} \mathbf{Y} \mathbf{V}^\top)} \\ &\stackrel{(c)}{=} \mathbf{U} \left\{ \frac{\int d\mathbf{Y} d\tilde{\mathbf{X}} \tilde{\mathbf{X}} P_X(\tilde{\mathbf{X}}) P_Y(\mathbf{Y}) P_W(\mathbf{S} - \tilde{\mathbf{X}}\mathbf{Y})}{\int d\mathbf{Y} d\tilde{\mathbf{X}} P_X(\tilde{\mathbf{X}}) P_Y(\mathbf{Y}) P_W(\mathbf{S} - \tilde{\mathbf{X}}\mathbf{Y})} \right\} \mathbf{U}^\top \\ &= \mathbf{U} \mathbb{E}[\mathbf{X}|\mathbf{S}] \mathbf{U}^\top \end{aligned}$$

447 where in (a), we changed variables  $\tilde{\mathbf{X}} \rightarrow \mathbf{U} \tilde{\mathbf{X}} \mathbf{U}^\top$ , used  $|\det \mathbf{U}| = 1$ , and rotational invariance of  $P_X$ ,  
 448  $P_X(\tilde{\mathbf{X}}) = P_X(\mathbf{U} \tilde{\mathbf{X}} \mathbf{U}^\top)$ . In (b), we changed variables  $\mathbf{Y} \rightarrow \mathbf{U} \mathbf{Y} \mathbf{V}^\top$ , used  $|\det \mathbf{U}| = |\det \mathbf{V}| = 1$ ,  
 449 and bi-rotational invariance of  $P_Y$ ,  $P_Y(\mathbf{Y}) = P_Y(\mathbf{U} \mathbf{Y} \mathbf{V}^\top)$ . In (c), we used the bi-rotational  
 450 invariance property of  $P_W$ , namely  $P_W(\mathbf{U}\mathbf{S}\mathbf{V}^\top - \mathbf{U} \tilde{\mathbf{X}} \mathbf{U}^\top \mathbf{U} \mathbf{Y} \mathbf{V}^\top) = P_W(\mathbf{S} - \tilde{\mathbf{X}}\mathbf{Y})$ .

## 451 A.2 Y Estimator

452 **Lemma 2.** *Given the observation matrix  $\mathbf{S}$ , let  $\hat{\mathbf{Y}}(\mathbf{S})$  be an estimator for  $\mathbf{Y}$ . Then  $\hat{\mathbf{Y}}(\mathbf{S})$  is a RIE if*  
 453 *and only if for any orthogonal matrices  $\mathbf{U} \in \mathbb{R}^{N \times N}$ ,  $\mathbf{V} \in \mathbb{R}^{M \times M}$ :*

$$\hat{\mathbf{Y}}(\mathbf{U}\mathbf{S}\mathbf{V}^\top) = \mathbf{U}\hat{\mathbf{Y}}(\mathbf{S})\mathbf{V}^\top \quad (24)$$

454 *Proof.* If  $\hat{\mathbf{Y}}(\mathbf{S})$  is a RIE, then this property clearly follows from the definition (4). Let us now show  
 455 the converse.

456 Suppose that an estimator  $\hat{\mathbf{Y}}(\mathbf{S})$  satisfies (24). First, we show that if the observation matrix is  
 457 diagonal, then the estimator is also diagonal. Consider the observation matrix to be  $\mathbf{S}^{\text{diag}} =$   
 458  $[\text{diag}(s_1, \dots, s_N) \mid \mathbf{0}_{N \times (M-N)}]$ . Let  $\mathbf{I}_k^- \in \mathbb{R}^{N \times N}$ ,  $\mathbf{J}_k^- \in \mathbb{R}^{M \times M}$  be diagonal matrices with  
 459 diagonal entries all one except the  $k$ -th entry which is  $-1$ . Note that for  $1 \leq k \leq N$ , we have  
 460  $\mathbf{S}^{\text{diag}} = \mathbf{I}_k^- \mathbf{S}^{\text{diag}} \mathbf{J}_k^-$ . Moreover, matrices  $\mathbf{I}_k^-$ ,  $\mathbf{J}_k^-$  are indeed orthogonal. For any  $1 \leq k \leq N$ , from  
 461 the property we have:

$$\hat{\mathbf{Y}}(\mathbf{S}^{\text{diag}}) = \hat{\mathbf{Y}}(\mathbf{I}_k^- \mathbf{S}^{\text{diag}} \mathbf{J}_k^-) = \mathbf{I}_k^- \hat{\mathbf{Y}}(\mathbf{S}^{\text{diag}}) \mathbf{J}_k^- \quad (25)$$

462 This implies that all entries on the  $k$ -th row and  $k$ -th column of  $\hat{\mathbf{Y}}(\mathbf{S}^{\text{diag}})$  is zero except the  $k$ -th  
 463 entry on the diagonal. Since this holds for any  $k$ , we conclude that  $\hat{\mathbf{Y}}(\mathbf{S}^{\text{diag}})$  is diagonal.

464 Now, for a given general observation matrix  $\mathbf{S} = \mathbf{U}_S \mathbf{\Gamma} \mathbf{V}_S^\top$ , put  $\mathbf{U} = \mathbf{U}_S^\top$ ,  $\mathbf{V} = \mathbf{V}_S^\top$  in the property  
 465 (24). We have:

$$\hat{\mathbf{Y}}(\mathbf{\Gamma}) = \mathbf{U}_S^\top \hat{\mathbf{Y}}(\mathbf{S}) \mathbf{V}_S$$

466 From the argument above, the matrix on the lhs is diagonal. Consequently, the matrix  $\mathbf{U}_S^\top \hat{\mathbf{Y}}(\mathbf{S}) \mathbf{V}_S$  is  
 467 diagonal which implies that the columns of  $\mathbf{U}_S$ ,  $\mathbf{V}_S$  are the left and right singular vectors of  $\hat{\mathbf{Y}}(\mathbf{S})$ .  
 468 Therefore,  $\hat{\mathbf{Y}}(\mathbf{S})$  is a RIE.  $\square$

469 Now, we prove that the posterior mean estimator  $\hat{\mathbf{Y}}^*(\mathbf{S}) = \mathbb{E}[\mathbf{Y}|\mathbf{S}]$  has the property (24), and it  
 470 is inside the RIE class. For simplicity, we drop the SNR factor  $\sqrt{\kappa}$ . For any orthogonal matrices  
 471  $\mathbf{U} \in \mathbb{R}^{N \times N}$ ,  $\mathbf{V} \in \mathbb{R}^{M \times M}$ , we have:

$$\begin{aligned} \mathbb{E}[\mathbf{Y}|\mathbf{U}\mathbf{S}\mathbf{V}^\top] &= \frac{\int d\mathbf{X} d\tilde{\mathbf{Y}} \tilde{\mathbf{Y}} P_X(\mathbf{X}) P_Y(\tilde{\mathbf{Y}}) P_W(\mathbf{U}\mathbf{S}\mathbf{V}^\top - \mathbf{X}\tilde{\mathbf{Y}})}{\int d\mathbf{X} d\tilde{\mathbf{Y}} P_X(\mathbf{X}) P_Y(\tilde{\mathbf{Y}}) P_W(\mathbf{U}\mathbf{S}\mathbf{V}^\top - \mathbf{X}\tilde{\mathbf{Y}})} \\ &\stackrel{(a)}{=} \frac{\int d\mathbf{X} d\tilde{\mathbf{Y}} \mathbf{U}\tilde{\mathbf{Y}}\mathbf{V}^\top P_X(\mathbf{X}) P_Y(\tilde{\mathbf{Y}}) P_W(\mathbf{U}\mathbf{S}\mathbf{V}^\top - \mathbf{X}\mathbf{U}\tilde{\mathbf{Y}}\mathbf{V}^\top)}{\int d\mathbf{X} d\tilde{\mathbf{Y}} P_X(\mathbf{X}) P_Y(\tilde{\mathbf{Y}}) P_W(\mathbf{U}\mathbf{S}\mathbf{V}^\top - \mathbf{X}\mathbf{U}\tilde{\mathbf{Y}}\mathbf{V}^\top)} \\ &\stackrel{(b)}{=} \frac{\int d\mathbf{X} d\tilde{\mathbf{Y}} \mathbf{U}\tilde{\mathbf{Y}}\mathbf{V}^\top P_X(\mathbf{X}) P_Y(\tilde{\mathbf{Y}}) P_W(\mathbf{U}\mathbf{S}\mathbf{V}^\top - \mathbf{U}\mathbf{X}\mathbf{U}^\top \mathbf{U}\tilde{\mathbf{Y}}\mathbf{V}^\top)}{\int d\mathbf{X} d\tilde{\mathbf{Y}} P_X(\mathbf{X}) P_Y(\tilde{\mathbf{Y}}) P_W(\mathbf{U}\mathbf{S}\mathbf{V}^\top - \mathbf{U}\mathbf{X}\mathbf{U}^\top \mathbf{U}\tilde{\mathbf{Y}}\mathbf{V}^\top)} \\ &\stackrel{(c)}{=} \mathbf{U} \left\{ \frac{\int d\mathbf{X} d\tilde{\mathbf{Y}} \tilde{\mathbf{Y}} P_X(\mathbf{X}) P_Y(\tilde{\mathbf{Y}}) P_W(\mathbf{S} - \mathbf{X}\tilde{\mathbf{Y}})}{\int d\mathbf{X} d\tilde{\mathbf{Y}} P_X(\mathbf{X}) P_Y(\tilde{\mathbf{Y}}) P_W(\mathbf{S} - \mathbf{X}\tilde{\mathbf{Y}})} \right\} \mathbf{V}^\top \\ &= \mathbf{U} \mathbb{E}[\mathbf{Y}|\mathbf{S}] \mathbf{V}^\top \end{aligned}$$

472 where in (a), we changed variables  $\tilde{\mathbf{Y}} \rightarrow \mathbf{U}\tilde{\mathbf{Y}}\mathbf{V}^\top$ , used  $|\det \mathbf{U}| = |\det \mathbf{V}| = 1$ , and bi-rotational  
 473 invariance of  $P_Y$ ,  $P_Y(\tilde{\mathbf{Y}}) = P_Y(\mathbf{U}\tilde{\mathbf{Y}}\mathbf{V}^\top)$ . In (b), we changed variables  $\mathbf{X} \rightarrow \mathbf{U}\mathbf{X}\mathbf{U}^\top$ , used  
 474  $|\det \mathbf{U}| = 1$ , and rotational invariance of  $P_X$ ,  $P_X(\mathbf{X}) = P_X(\mathbf{U}\mathbf{X}\mathbf{U}^\top)$ . In (c), we used the  
 475 bi-rotational invariance property of  $P_W$ , namely  $P_W(\mathbf{U}\mathbf{S}\mathbf{V}^\top - \mathbf{U}\mathbf{X}\tilde{\mathbf{Y}}\mathbf{V}^\top) = P_W(\mathbf{S} - \mathbf{X}\tilde{\mathbf{Y}})$ .

## 476 B The replica method for deriving the resolvent relation

477 In this section we present the replica method used to obtain the resolvent relation. For simplicity of  
 478 notation we use  $\mathbf{G}(z) \equiv \mathbf{G}_{\mathcal{S}}(z)$  for the resolvent of a random matrix  $\mathcal{S}$ .

479 First, we express the entries of the resolvent  $\mathbf{G}(z)$  using the Gaussian integral representation of an  
 480 inverse matrix [47]:

$$\begin{aligned} G_{ij}(z) &= \sqrt{\frac{1}{(2\pi)^{N+M} \det(z\mathbf{I} - \mathcal{S})}} \int \left( \prod_{k=1}^{M+N} d\eta_k \right) \eta_i \eta_j \exp \left\{ -\frac{1}{2} \boldsymbol{\eta}^\top (z\mathbf{I} - \mathcal{S}) \boldsymbol{\eta} \right\} \\ &= \frac{\int \left( \prod_{k=1}^{M+N} d\eta_k \right) \eta_i \eta_j \exp \left\{ -\frac{1}{2} \boldsymbol{\eta}^\top (z\mathbf{I} - \mathcal{S}) \boldsymbol{\eta} \right\}}{\int \left( \prod_{k=1}^{M+N} d\eta_k \right) \exp \left\{ -\frac{1}{2} \boldsymbol{\eta}^\top (z\mathbf{I} - \mathcal{S}) \boldsymbol{\eta} \right\}} \end{aligned} \quad (26)$$

481 For  $z$  not close to the real axis, the resolvent is expected to exhibit self-averaging behavior in the  
 482 limit of large  $N$ , meaning that it will not depend on the particular matrix realization. Thus, we can  
 483 examine the resolvent  $\mathbf{G}_{\mathcal{S}}(z)$  by analyzing its ensemble average, denoted by  $\langle \cdot \rangle$  in the following.

$$\langle G_{ij}(z) \rangle = \left\langle \frac{1}{\mathcal{Z}} \int \left( \prod_{k=1}^{M+N} d\eta_k \right) \eta_i \eta_j \exp \left\{ -\frac{1}{2} \boldsymbol{\eta}^\top (z\mathbf{I} - \mathcal{S}) \boldsymbol{\eta} \right\} \right\rangle \quad (27)$$

484 where  $\mathcal{Z}$  is the denominator in (26). Computing the average is, in general, non-trivial. However,  
 485 the replica method provides us with a technique to overcome this issue by employing the following  
 486 identity:

$$\begin{aligned} \langle G_{ij}(z) \rangle &= \lim_{n \rightarrow 0} \left\langle \mathcal{Z}^{n-1} \int \left( \prod_{k=1}^{M+N} d\eta_k \right) \eta_i \eta_j \exp \left\{ -\frac{1}{2} \boldsymbol{\eta}^\top (z\mathbf{I} - \mathcal{S}) \boldsymbol{\eta} \right\} \right\rangle \\ &= \lim_{n \rightarrow 0} \left\langle \int \left( \prod_{k=1}^{M+N} \prod_{\tau=1}^n d\eta_k^{(\tau)} \right) \eta_i^{(1)} \eta_j^{(1)} \exp \left\{ -\frac{1}{2} \sum_{\tau=1}^n \boldsymbol{\eta}^{(\tau)\top} (z\mathbf{I} - \mathcal{S}) \boldsymbol{\eta}^{(\tau)} \right\} \right\rangle \end{aligned} \quad (28)$$

487 So, the problem now is reduced to computation of an average over  $n$  copies (or replicas) of the initial  
 488 system (26). After computing the average value (the bracket) in (28), we can perform an analytical  
 489 continuation of the result to real values of  $n$  and then take the limit  $n \rightarrow 0$ . Throughout, we assume  
 490 as is common in the replica method, that the analytical continuation can be done with only  $n$  different  
 491 sets of points. Of course, this is a totally uncontrolled step that comes with no guarantees.

## C Derivation of the RIE for $\mathbf{X}$

In this section, we consider estimating  $\mathbf{X}$ , and treat both  $\mathbf{Y}$  and  $\mathbf{W}$  as noise. We consider  $\mathbf{X}$  to be fixed, and the observation model:

$$\mathbf{S} = \mathbf{X}\mathbf{U}_1\mathbf{Y}\mathbf{V}_1^\top + \mathbf{U}_2\mathbf{W}\mathbf{V}_2^\top \quad (29)$$

where  $\mathbf{Y}, \mathbf{W} \in \mathbb{R}^{N \times M}$  are fixed matrices with limiting singular value distribution  $\mu_Y, \mu_W$ , and  $\mathbf{U}_1, \mathbf{U}_2 \in \mathbb{R}^{N \times N}, \mathbf{V}_1, \mathbf{V}_2 \in \mathbb{R}^{M \times M}$  are independent random Haar matrices.

Construct the hermitization  $\mathcal{S} \in \mathbb{R}^{(N+M) \times (N+M)}$  from  $\mathbf{S}$  as

$$\mathcal{S} = \begin{bmatrix} \mathbf{0}_{N \times N} & \mathbf{S} \\ \mathbf{S}^\top & \mathbf{0}_{M \times M} \end{bmatrix}$$

For simplicity of notation, we use  $\mathbf{T} \equiv \mathbf{X}\mathbf{U}_1\mathbf{Y}\mathbf{V}_1^\top$ ,  $\mathcal{T} \in \mathbb{R}^{(N+M) \times (N+M)}$  the hermitization of  $\mathbf{T}$ , and  $\mathcal{W}$  denotes the hermitization of the matrix  $\mathbf{U}_2\mathbf{W}\mathbf{V}_2^\top$ .

### C.1 Resolvent relation

We want to find a relation between  $\mathbf{G}(z) \equiv \mathbf{G}_{\mathcal{S}}(z)$ , and the signal matrix  $\mathbf{X}$ . From (28), we have

$$\begin{aligned} \langle G_{ij}(z) \rangle &= \lim_{n \rightarrow \infty} \int \left( \prod_{k=1}^{N+M} \prod_{\tau=1}^n d\eta_k^{(\tau)} \right) \eta_i^{(1)} \eta_j^{(1)} \left\langle \exp \left\{ -\frac{1}{2} \sum_{\tau=1}^n \boldsymbol{\eta}^{(\tau)\top} (z\mathbf{I} - \mathcal{S}) \boldsymbol{\eta}^{(\tau)} \right\} \right\rangle_{\mathbf{U}_1, \mathbf{U}_2, \mathbf{V}_1, \mathbf{V}_2} \\ &= \lim_{n \rightarrow \infty} \int \left( \prod_{k=1}^{N+M} \prod_{\tau=1}^n d\eta_k^{(\tau)} \right) \eta_i^{(1)} \eta_j^{(1)} \exp \left\{ -\frac{z}{2} \sum_{\tau=1}^n \boldsymbol{\eta}^{(\tau)\top} \boldsymbol{\eta}^{(\tau)} \right\} \\ &\quad \times \left\langle \exp \left\{ \frac{1}{2} \sum_{\tau=1}^n \boldsymbol{\eta}^{(\tau)\top} \mathcal{T} \boldsymbol{\eta}^{(\tau)} \right\} \right\rangle_{\mathbf{U}_1, \mathbf{V}_1} \left\langle \exp \left\{ \frac{1}{2} \sum_{\tau=1}^n \boldsymbol{\eta}^{(\tau)\top} \widetilde{\mathcal{W}} \boldsymbol{\eta}^{(\tau)} \right\} \right\rangle_{\mathbf{U}_2, \mathbf{V}_2} \end{aligned} \quad (30)$$

Split each replica  $\boldsymbol{\eta}^{(\tau)}$  into two vectors  $\mathbf{a}^{(\tau)} \in \mathbb{R}^N, \mathbf{b}^{(\tau)} \in \mathbb{R}^M, \boldsymbol{\eta}^{(\tau)} = \begin{bmatrix} \mathbf{a}^{(\tau)} \\ \mathbf{b}^{(\tau)} \end{bmatrix}$ . The exponent in the first bracket in (30) can be written as:

$$\begin{aligned} \boldsymbol{\eta}^{(\tau)\top} \mathcal{T} \boldsymbol{\eta}^{(\tau)} &= \mathbf{a}^{(\tau)\top} \mathbf{X}\mathbf{U}_1\mathbf{Y}\mathbf{V}_1^\top \mathbf{b}^{(\tau)} + \mathbf{b}^{(\tau)\top} \mathbf{V}_1\mathbf{Y}^\top \mathbf{U}_1^\top \mathbf{X} \mathbf{a}^{(\tau)} \\ &= 2\mathbf{a}^{(\tau)\top} \mathbf{X}\mathbf{U}_1\mathbf{Y}\mathbf{V}_1^\top \mathbf{b}^{(\tau)} \\ &= 2 \operatorname{Tr} \mathbf{b}^{(\tau)} \mathbf{a}^{(\tau)\top} \mathbf{X}\mathbf{U}_1\mathbf{Y}\mathbf{V}_1^\top \end{aligned} \quad (31)$$

Using the formula for the rectangular spherical integral [20] (see Theorem 2 in H.1), we find:

$$\left\langle \exp \left\{ \sum_{\tau=1}^n \operatorname{Tr} \mathbf{b}^{(\tau)} \mathbf{a}^{(\tau)\top} \mathbf{X}\mathbf{U}_1\mathbf{Y}\mathbf{V}_1^\top \right\} \right\rangle_{\mathbf{U}_1, \mathbf{V}_1} \approx \exp \left\{ \frac{N}{2} \sum_{\tau=1}^n \mathcal{Q}_{\mu_Y}^{(\alpha)} \left( \frac{1}{NM} \|\mathbf{X} \mathbf{a}^{(\tau)}\|^2 \|\mathbf{b}^{(\tau)}\|^2 \right) \right\} \quad (32)$$

with  $\mathcal{Q}_{\mu_Y}^{(\alpha)}(x) = \int_0^x \frac{\mathcal{C}_{\mu_Y}^{(\alpha)}(t)}{t} dt$ . In (32), we used that  $\mathbf{b}^{(\tau)} \mathbf{a}^{(\tau)\top} \mathbf{X}$  is a rank-one matrix with non-zero singular value  $\|\mathbf{b}^{(\tau)}\| \|\mathbf{X} \mathbf{a}^{(\tau)}\|$ .

Similarly, for the second bracket in (30) we can write:

$$\begin{aligned} \boldsymbol{\eta}^{(\tau)\top} \widetilde{\mathcal{W}} \boldsymbol{\eta}^{(\tau)} &= \mathbf{a}^{(\tau)\top} \mathbf{U}_2\mathbf{W}\mathbf{V}_2^\top \mathbf{b}^{(\tau)} + \mathbf{b}^{(\tau)\top} \mathbf{V}_2\mathbf{W}^\top \mathbf{U}_2^\top \mathbf{a}^{(\tau)} \\ &= 2\mathbf{a}^{(\tau)\top} \mathbf{U}_2\mathbf{W}\mathbf{V}_2^\top \mathbf{b}^{(\tau)} \\ &= 2 \operatorname{Tr} \mathbf{b}^{(\tau)} \mathbf{a}^{(\tau)\top} \mathbf{U}_2\mathbf{W}\mathbf{V}_2^\top \end{aligned} \quad (33)$$

which using the formula of rectangular spherical integrals, implies

$$\left\langle \exp \left\{ \sum_{\tau=1}^n \operatorname{Tr} \mathbf{b}^{(\tau)} \mathbf{a}^{(\tau)\top} \mathbf{U}_2\mathbf{W}\mathbf{V}_2^\top \right\} \right\rangle_{\mathbf{U}_2, \mathbf{V}_2} \approx \exp \left\{ \frac{N}{2} \sum_{\tau=1}^n \mathcal{Q}_{\mu_W}^{(\alpha)} \left( \frac{1}{NM} \|\mathbf{a}^{(\tau)}\|^2 \|\mathbf{b}^{(\tau)}\|^2 \right) \right\} \quad (34)$$



509 From (30), (32), (34), we find:

$$\begin{aligned} \langle G_{ij}(z) \rangle &= \lim_{n \rightarrow \infty} \int \left( \prod_{k=1}^{N+M} \prod_{\tau=1}^n d\eta_k^{(\tau)} \right) \eta_i^{(1)} \eta_j^{(1)} \\ &\times \exp \left\{ -\frac{1}{2} \sum_{\tau=1}^n z \|\boldsymbol{\eta}^{(\tau)}\|^2 - N \mathcal{Q}_{\mu_Y}^{(\alpha)} \left( \frac{\|\mathbf{X} \mathbf{a}^{(\tau)}\|^2 \|\mathbf{b}^{(\tau)}\|^2}{NM} \right) - N \mathcal{Q}_{\mu_W}^{(\alpha)} \left( \frac{\|\mathbf{a}^{(\tau)}\|^2 \|\mathbf{b}^{(\tau)}\|^2}{NM} \right) \right\} \end{aligned} \quad (35)$$

510 Now, we introduce delta functions  $\delta(p_1^{(\tau)} - \frac{\|\mathbf{a}^{(\tau)}\|^2}{N})$ ,  $\delta(p_2^{(\tau)} - \frac{\|\mathbf{b}^{(\tau)}\|^2}{M})$ , and  $\delta(p_3^{(\tau)} - \frac{\|\mathbf{X} \mathbf{a}^{(\tau)}\|^2}{N})$ ,  
511 and using them, the integral in (35) can be written as (for brevity we drop the limit term):

$$\begin{aligned} \langle G_{ij}(z) \rangle &= \int \left( \prod_{k=1}^{N+M} \prod_{\tau=1}^n d\eta_k^{(\tau)} \right) \left( \prod_{\tau=1}^n dp_1^{(\tau)} dp_2^{(\tau)} dp_3^{(\tau)} \right) \eta_i^{(1)} \eta_j^{(1)} \\ &\times \prod_{\tau=1}^n \delta\left(p_1^{(\tau)} - \frac{\|\mathbf{a}^{(\tau)}\|^2}{N}\right) \delta\left(p_2^{(\tau)} - \frac{\|\mathbf{b}^{(\tau)}\|^2}{M}\right) \delta\left(p_3^{(\tau)} - \frac{\|\mathbf{X} \mathbf{a}^{(\tau)}\|^2}{N}\right) \quad (36) \\ &\times \exp \left\{ -\frac{1}{2} \sum_{\tau=1}^n z \|\boldsymbol{\eta}^{(\tau)}\|^2 - N \mathcal{Q}_{\mu_Y}^{(\alpha)}(p_2^{(\tau)} p_3^{(\tau)}) - N \mathcal{Q}_{\mu_W}^{(\alpha)}(p_1^{(\tau)} p_2^{(\tau)}) \right\} \end{aligned}$$

512 In the next step, we replace each delta with its Fourier transform,  $\delta(p_1^\tau - \frac{1}{N} \|\mathbf{a}^\tau\|^2) \propto \int d\zeta_1^\tau \exp \left\{ -\right.$   
513  $\left. \frac{N}{2} \zeta_1^\tau (p_1^\tau - \frac{1}{N} \|\mathbf{a}^\tau\|^2) \right\}$ . After rearranging, we find:

$$\begin{aligned} \langle G_{ij}(z) \rangle &\propto \int \left( \prod_{\tau=1}^n dp_1^{(\tau)} dp_2^{(\tau)} dp_3^{(\tau)} d\zeta_1^{(\tau)} d\zeta_2^{(\tau)} d\zeta_3^{(\tau)} \right) \\ &\times \exp \left\{ \frac{N}{2} \sum_{\tau=1}^n \mathcal{Q}_{\mu_Y}^{(\alpha)}(p_2^{(\tau)} p_3^{(\tau)}) + \mathcal{Q}_{\mu_W}^{(\alpha)}(p_1^{(\tau)} p_2^{(\tau)}) - \zeta_1^{(\tau)} p_1^{(\tau)} - \frac{1}{\alpha} \zeta_2^{(\tau)} p_2^{(\tau)} - \zeta_3^{(\tau)} p_3^{(\tau)} \right\} \\ &\times \int \left( \prod_{k=1}^{N+M} \prod_{\tau=1}^n d\eta_k^{(\tau)} \right) \eta_i^{(1)} \eta_j^{(1)} \\ &\times \exp \left\{ -\frac{1}{2} \sum_{\tau=1}^n z \|\boldsymbol{\eta}^{(\tau)}\|^2 - \zeta_1^{(\tau)} \|\mathbf{a}^{(\tau)}\|^2 - \zeta_2^{(\tau)} \|\mathbf{b}^{(\tau)}\|^2 - \zeta_3^{(\tau)} \|\mathbf{X} \mathbf{a}^{(\tau)}\|^2 \right\} \end{aligned} \quad (37)$$

514 The inner integral in (37) is a Gaussian integral, and can be written as:

$$\begin{aligned} &\int \left( \prod_{k=1}^{N+M} \prod_{\tau=1}^n d\eta_k^{(\tau)} \right) \eta_i^{(1)} \eta_j^{(1)} \\ &\times \exp \left\{ \sum_{\tau=1}^n -\frac{1}{2} \boldsymbol{\eta}^{(\tau)\top} \begin{bmatrix} (z - \zeta_1^{(\tau)}) \mathbf{I}_N - \zeta_3^{(\tau)} \mathbf{X}^2 & \mathbf{0} \\ \mathbf{0} & (z - \zeta_2^{(\tau)}) \mathbf{I}_M \end{bmatrix} \boldsymbol{\eta}^{(\tau)} \right\} \end{aligned} \quad (38)$$

515 Denote the matrix in the exponent by  $\mathbf{C}_X^{(\tau)}$ . Its determinant reads:

$$\det \mathbf{C}_X^{(\tau)} = (z - \zeta_2^{(\tau)})^M \prod_{k=1}^N (z - \zeta_1^{(\tau)} - \zeta_3^{(\tau)} \lambda_k^2)$$

516 where  $\lambda_k$ 's are eigenvalues of  $\mathbf{X}$ . So replacing the formula for the Gaussian integrals, (37) can be  
517 written as:

$$\begin{aligned} \langle G_{ij}(z) \rangle &\propto \int \left( \prod_{\tau=1}^n dp_1^{(\tau)} dp_2^{(\tau)} dp_3^{(\tau)} d\zeta_1^{(\tau)} d\zeta_2^{(\tau)} d\zeta_3^{(\tau)} \right) \left( \mathbf{C}_X^{(1)-1} \right)_{ij} \\ &\times \exp \left\{ -\frac{Nn}{2} F_0^X(\mathbf{p}_1, \mathbf{p}_2, \mathbf{p}_3, \zeta_1, \zeta_2, \zeta_3) \right\} \end{aligned} \quad (39)$$

518 with

$$F_0^X(\mathbf{p}_1, \mathbf{p}_2, \mathbf{p}_3, \zeta_1, \zeta_2, \zeta_3) = \frac{1}{n} \sum_{\tau=1}^n \left[ \frac{1}{N} \sum_{k=1}^N \ln(z - \zeta_1^{(\tau)} - \zeta_3^{(\tau)} \lambda_k^2) + \frac{1}{\alpha} \ln(z - \zeta_2^{(\tau)}) \right. \\ \left. - \mathcal{Q}_{\mu_Y}^{(\alpha)}(p_2^{(\tau)} p_3^{(\tau)}) - \mathcal{Q}_{\mu_W}^{(\alpha)}(p_1^{(\tau)} p_2^{(\tau)}) + \zeta_1^{(\tau)} p_1^{(\tau)} + \frac{1}{\alpha} \zeta_2^{(\tau)} p_2^{(\tau)} + \zeta_3^{(\tau)} p_3^{(\tau)} \right] \quad (40)$$

519 In the large  $N$  limit, the integral in (39) can be computed using the saddle-points of the function  $F_0^X$ .  
 520 In the evaluation of this integral, we use the *replica symmetric* ansatz that assumes a saddle-point of  
 521 the form:

$$\forall \tau \in \{1, \dots, n\} : \quad \begin{cases} p_1^\tau = p_1, & p_2^\tau = p_2, & p_3^\tau = p_3 \\ \zeta_1^\tau = \zeta_1, & \zeta_2^\tau = \zeta_2, & \zeta_3^\tau = \zeta_3 \end{cases}$$

522 The saddle point is a solution of the set of equations:

$$\begin{cases} \zeta_1^* = \frac{\mathcal{C}_{\mu_W}^{(\alpha)}(p_1^* p_2^*)}{p_1^*}, & \zeta_2^* = \frac{\alpha}{p_2^*} (\mathcal{C}_{\mu_W}^{(\alpha)}(p_1^* p_2^*) + \mathcal{C}_{\mu_Y}^{(\alpha)}(p_2^* p_3^*)), & \zeta_3^* = \frac{\mathcal{C}_{\mu_Y}^{(\alpha)}(p_2^* p_3^*)}{p_3^*} \\ p_1^* = \frac{1}{\zeta_3^*} \mathcal{G}_{\rho_{X^2}}\left(\frac{z - \zeta_1^*}{\zeta_3^*}\right), & p_2^* = \frac{1}{z - \zeta_2^*}, & p_3^* = \frac{z - \zeta_1^*}{\zeta_3^{*2}} \mathcal{G}_{\rho_{X^2}}\left(\frac{z - \zeta_1^*}{\zeta_3^*}\right) - \frac{1}{\zeta_3^*} \end{cases} \quad (41)$$

523 Now, since the relation (39) and the solutions (41) hold for arbitrary indices  $i, j$ , we can state the  
 524 relation in matrix form. The inverse of  $\mathbf{C}_X^{*-1}$ , and the block structure of  $\mathbf{G}_S(z)$  are computed in  
 525 sections H.2. From (111), (112) we have (for sufficiently large  $N$ ):

$$\begin{aligned} \langle \mathbf{G}_S(z) \rangle_{U_1, U_2, V_1, V_2} &= \left\langle \begin{bmatrix} \frac{1}{z} \mathbf{I}_N + \frac{1}{z} \mathbf{S} \mathbf{G}_{S^\top S}(z^2) \mathbf{S}^\top & \mathbf{S} \mathbf{G}_{S^\top S}(z^2) \\ \mathbf{G}_{S^\top S}(z^2) \mathbf{S}^\top & z \mathbf{G}_{S^\top S}(z^2) \end{bmatrix} \right\rangle \\ &= \begin{bmatrix} \frac{1}{\zeta_3^*} \mathbf{G}_{X^2}\left(\frac{z - \zeta_1^*}{\zeta_3^*}\right) & \mathbf{0} \\ \mathbf{0} & \frac{1}{z - \zeta_2^*} \mathbf{I}_M \end{bmatrix} \end{aligned} \quad (42)$$

526 With this relation, we proceed to simplify the equations (41).

527 The normalized trace of the upper-left blocks of  $\langle \mathbf{G}_S(z) \rangle_{U_1, U_2, V_1, V_2}$  is:

$$\begin{aligned} \frac{1}{N} \sum_{k=1}^N \left[ \frac{1}{z} + \frac{1}{z} \frac{\gamma_k^2}{z^2 - \gamma_k^2} \right] &= \frac{1}{z} \frac{1}{N} \sum_{k=1}^N \left[ 1 + \frac{\gamma_k^2}{z^2 - \gamma_k^2} \right] \\ &= z \frac{1}{N} \sum_{k=1}^N \frac{1}{z^2 - \gamma_k^2} \\ &= \frac{1}{2N} \sum_{k=1}^N \left[ \frac{1}{z - \gamma_k} + \frac{1}{z + \gamma_k} \right] = \mathcal{G}_{\bar{\mu}_S}(z) \end{aligned} \quad (43)$$

528 and the normalized trace of the upper-left block in  $\mathbf{C}_X^{*-1}$  is  $\frac{1}{\zeta_3^*} \mathcal{G}_{\rho_{X^2}}\left(\frac{z - \zeta_1^*}{\zeta_3^*}\right) = p_1^*$ . Therefore, we  
 529 have  $p_1^* = \mathcal{G}_{\bar{\mu}_S}(z)$ .

530 The normalized trace of lower-right block of  $\langle \mathbf{G}_S(z) \rangle_{U_1, U_2, V_1, V_2}$  reads:

$$\frac{1}{M} z \left[ \sum_{k=1}^N \frac{1}{z^2 - \gamma_k^2} + (M - N) \frac{1}{z^2} \right] = \frac{N}{M} \mathcal{G}_{\bar{\mu}_S}(z) + \frac{M - N}{M} \frac{1}{z} = \alpha \mathcal{G}_{\bar{\mu}_S}(z) + (1 - \alpha) \frac{1}{z} \quad (44)$$

531 and the normalized trace of the lower-right block in  $\mathbf{C}_X^{*-1}$  is  $\frac{1}{z - \zeta_2^*} = p_2^*$ . Therefore, we have

532  $p_2^* = \alpha \mathcal{G}_{\bar{\mu}_S}(z) + (1 - \alpha) \frac{1}{z}$ . Moreover, we also have that  $\zeta_2^* = \alpha z \frac{z \mathcal{G}_{\bar{\mu}_S}(z) - 1}{\alpha z \mathcal{G}_{\bar{\mu}_S}(z) + 1 - \alpha}$ .

Therefore, the saddle point equations (41) can be rewritten in a simplified form, which does not involve  $\rho_{X^2}$ , as:

$$\begin{cases} \zeta_1^* = \frac{\mathcal{C}_{\mu_W}^{(\alpha)}(p_1^* p_2^*)}{p_1^*}, & \zeta_2^* = \alpha z \frac{z \mathcal{G}_{\bar{\mu}_S}(z) - 1}{\alpha z \mathcal{G}_{\bar{\mu}_S}(z) + 1 - \alpha}, & \zeta_3^* = \frac{\mathcal{C}_{\mu_Y}^{(\alpha)}(p_2^* p_3^*)}{p_3^*} \\ p_1^* = \mathcal{G}_{\bar{\mu}_S}(z), & p_2^* = \alpha \mathcal{G}_{\bar{\mu}_S}(z) + (1 - \alpha) \frac{1}{z}, & p_3^* = \frac{z - \zeta_1^*}{\zeta_3^*} \mathcal{G}_{\bar{\mu}_S}(z) - \frac{1}{\zeta_3^*} \end{cases} \quad (45)$$

Note that  $\zeta_1^*, \zeta_2^*$  can be computed from the observation matrix, and we only need to find  $\zeta_3^*$  satisfying the following equation:

$$(z - \zeta_1^*) \mathcal{G}_{\bar{\mu}_S}(z) - 1 = \mathcal{C}_{\mu_Y}^{(\alpha)} \left( \frac{1}{\zeta_3^*} [\alpha \mathcal{G}_{\bar{\mu}_S}(z) + \frac{1 - \alpha}{z}] [(z - \zeta_1^*) \mathcal{G}_{\bar{\mu}_S}(z) - 1] \right) \quad (46)$$

## C.2 Overlaps and optimal eigenvalues

We restate the relation between the resolvent and the overlaps from the main text (18). For  $\tilde{\mathbf{x}}_i = [\mathbf{x}_i^\top, \mathbf{0}_M]^\top$  with  $\mathbf{x}_i$  eigenvectors of  $\mathbf{X}$ , we have:

$$\tilde{\mathbf{x}}_i^\top (\text{Im } \mathbf{G}_S(x - i\epsilon)) \tilde{\mathbf{x}}_i \approx \pi \bar{\mu}_S(x) O_X(x, \lambda_i) \quad (47)$$

From (47), (42), we find:

$$\begin{aligned} O_X(\gamma, \lambda_i) &\approx \frac{1}{\pi \bar{\mu}_S(\gamma)} \text{Im} \lim_{z \rightarrow \gamma - i0^+} \mathbf{x}_i^\top \zeta_3^{*-1} \mathbf{G}_{X^2} \left( \frac{z - \zeta_1^*}{\zeta_3^*} \right) \mathbf{x}_i \\ &= \frac{1}{\pi \bar{\mu}_S(\gamma)} \text{Im} \lim_{z \rightarrow \gamma - i0^+} \frac{1}{z - \zeta_1^* - \zeta_3^* \lambda_i^2} \end{aligned} \quad (48)$$

Once we have the overlap, we can compute the optimal eigenvalues from (14) in section 5. Note that, until now we had absorbed  $\sqrt{\kappa}$  into  $\mathbf{X}$ . Therefore, we should use (48) with  $O_X(\gamma, \sqrt{\kappa} \lambda_i)$ . This leads to:

$$\begin{aligned} \hat{\xi}_{xi}^* &\approx \frac{1}{N} \sum_{j=1}^N \lambda_j O_X(\gamma_i, \sqrt{\kappa} \lambda_j) \\ &\approx \frac{1}{\pi \bar{\mu}_S(\gamma_i)} \text{Im} \lim_{z \rightarrow \gamma_i - i0^+} \frac{1}{N} \sum_{j=1}^N \frac{\lambda_j}{z - \zeta_1^* - \zeta_3^* \kappa \lambda_j^2} \\ &= \frac{1}{\pi \bar{\mu}_S(\gamma_i)} \text{Im} \lim_{z \rightarrow \gamma_i - i0^+} \frac{1}{\kappa \zeta_3^*} \frac{1}{N} \sum_{j=1}^N \frac{\lambda_j}{\frac{z - \zeta_1^*}{\kappa \zeta_3^*} - \lambda_j^2} \\ &= \frac{1}{\kappa \pi \bar{\mu}_S(\gamma_i)} \text{Im} \lim_{z \rightarrow \gamma_i - i0^+} \frac{1}{\zeta_3^*} \left( \frac{1}{2} \frac{1}{N} \sum_{j=1}^N \frac{1}{\sqrt{\frac{z - \zeta_1^*}{\kappa \zeta_3^*}} - \lambda_j} - \frac{1}{2} \frac{1}{N} \sum_{j=1}^N \frac{1}{\sqrt{\frac{z - \zeta_1^*}{\kappa \zeta_3^*}} + \lambda_j} \right) \\ &\approx \frac{1}{\kappa \pi \bar{\mu}_S(\gamma_i)} \text{Im} \lim_{z \rightarrow \gamma_i - i0^+} \left\{ \frac{1}{2} \frac{1}{\zeta_3^*} \mathcal{G}_{\rho_X} \left( \sqrt{\frac{z - \zeta_1^*}{\kappa \zeta_3^*}} \right) - \frac{1}{2} \frac{1}{\zeta_3^*} \mathcal{G}_{\rho_{-X}} \left( \sqrt{\frac{z - \zeta_1^*}{\kappa \zeta_3^*}} \right) \right\} \\ &= \frac{1}{2 \kappa \pi \bar{\mu}_S(\gamma_i)} \text{Im} \lim_{z \rightarrow \gamma_i - i0^+} \left\{ \frac{1}{\zeta_3^*} \left[ \mathcal{G}_{\rho_X} \left( \sqrt{\frac{z - \zeta_1^*}{\kappa \zeta_3^*}} \right) + \mathcal{G}_{\rho_X} \left( -\sqrt{\frac{z - \zeta_1^*}{\kappa \zeta_3^*}} \right) \right] \right\} \end{aligned} \quad (49)$$

### C.2.1 Estimating $\mathbf{X}^2$

The resolvent relation we have found in (42) is in terms of  $\mathbf{G}_{X^2}$ . Therefore, like other RIEs in other problems [14, 18], we can express the estimator for  $\mathbf{X}^2$  without any knowledge about  $\rho_X$  or  $\rho_{X^2}$ . One can see that, the optimal RIE for  $\mathbf{X}^2$  is constructed in the same way as for  $\mathbf{X}$  with eigenvalues denoted by  $\hat{\xi}_{x^2_i}^*$ . To compute the optimal eigenvalues, we absorb  $\sqrt{\kappa}$  into  $\mathbf{X}$  and we use the exact

549 expression in (48). In the end, we only need to divide by  $\kappa$  to find an estimator for the true  $\mathbf{X}^2$ .

$$\begin{aligned}
\widehat{\xi_{x^2 i}^*} &\approx \frac{1}{N} \sum_{j=1}^N \lambda_j^2 O_X(\gamma_i, \lambda_j) \\
&\approx \frac{1}{\pi \bar{\mu}_S(\gamma_i)} \operatorname{Im} \lim_{z \rightarrow \gamma_i - i0^+} \frac{1}{N} \sum_{j=1}^N \frac{\lambda_j^2}{z - \zeta_1^* - \zeta_3^* \lambda_j^2} \\
&= \frac{1}{\pi \bar{\mu}_S(\gamma_i)} \operatorname{Im} \lim_{z \rightarrow \gamma_i - i0^+} \frac{1}{\zeta_3^*} \frac{1}{N} \sum_{j=1}^N \frac{\lambda_j^2}{\frac{z - \zeta_1^*}{\zeta_3^*} - \lambda_j^2} \\
&= \frac{1}{\pi \bar{\mu}_S(\gamma_i)} \operatorname{Im} \lim_{z \rightarrow \gamma_i - i0^+} -\frac{1}{\zeta_3^*} \frac{1}{N} \sum_{j=1}^N \frac{\frac{z - \zeta_1^*}{\zeta_3^*} - \lambda_j^2 - \frac{z - \zeta_1^*}{\zeta_3^*}}{\frac{z - \zeta_1^*}{\zeta_3^*} - \lambda_j^2} \\
&= \frac{1}{\pi \bar{\mu}_S(\gamma_i)} \operatorname{Im} \lim_{z \rightarrow \gamma_i - i0^+} -\frac{1}{\zeta_3^*} \frac{1}{N} \sum_{j=1}^N \left[ 1 - \frac{z - \zeta_1^*}{\zeta_3^*} \frac{1}{\frac{z - \zeta_1^*}{\zeta_3^*} - \lambda_j^2} \right] \\
&\approx \frac{1}{\pi \bar{\mu}_S(\gamma_i)} \operatorname{Im} \lim_{z \rightarrow \gamma_i - i0^+} -\frac{1}{\zeta_3^*} + \frac{z - \zeta_1^*}{\zeta_3^{*2}} \mathcal{G}_{\rho_{X^2}}\left(\frac{z - \zeta_1^*}{\zeta_3^*}\right) \\
&\stackrel{(a)}{=} \frac{1}{\pi \bar{\mu}_S(\gamma_i)} \operatorname{Im} \lim_{z \rightarrow \gamma_i - i0^+} p_3^* \\
&\stackrel{(b)}{=} \frac{1}{\pi \bar{\mu}_S(\gamma_i)} \operatorname{Im} \lim_{z \rightarrow \gamma_i - i0^+} \frac{z - \zeta_1^*}{\zeta_3^*} \mathcal{G}_{\bar{\mu}_S}(z) - \frac{1}{\zeta_3^*}
\end{aligned} \tag{50}$$

550 where in (a) we used (41), and for (b) we used (45). Thus, the optimal eigenvalues for  $\mathbf{X}^2$  read:

$$\widehat{\xi_{x^2 i}^*} = \frac{1}{\kappa} \frac{1}{\pi \bar{\mu}_S(\gamma_i)} \operatorname{Im} \lim_{z \rightarrow \gamma_i - i0^+} \frac{z - \zeta_1^*}{\zeta_3^*} \mathcal{G}_{\bar{\mu}_S}(z) - \frac{1}{\zeta_3^*} \tag{51}$$

551 Note that the parameters  $\zeta_1^*, \zeta_3^*$  can be computed from (45), (46), without the knowledge of  $\rho_X$  or  
552  $\rho_{X^2}$ .

553 **Remark 3.** The main barrier to find an estimator for  $\mathbf{X}$  is that the resolvent relation (42) is in terms of  
554  $\mathcal{G}_{\rho_{X^2}}$ . Moreover, in the estimator for  $\mathbf{X}$ , second equality in (49), we have the sum  $\sum_{j=1}^N \frac{\lambda_j}{z - \zeta_1^* - \kappa \zeta_3^* \lambda_j^2}$   
555 which cannot be written in terms of  $\mathcal{G}_{\rho_{X^2}}$ .

556 **Remark 4.** If we add the assumption that the matrix  $\mathbf{X}$  is positive semi-definite, without any further  
557 knowledge on the prior, we can use  $\sqrt{\widehat{\xi_{x^2 i}^*}}$  for the eigenvalues of  $\Xi_X(\mathbf{S})$ . However, note that, this  
558 estimator is sub-optimal for  $\mathbf{X}$  as  $\sqrt{\sum_{j=1}^N \lambda_j^2 (\mathbf{u}_i^\top \mathbf{x}_j)^2} \neq \sum_{j=1}^N \lambda_j (\mathbf{u}_i^\top \mathbf{x}_j)^2$ .

### 559 C.3 Numerical Examples

560 In this section, we will illustrate the derived formulas (42), (48), and (49) with numerical experiments.

561 We consider matrices  $\mathbf{Y}, \mathbf{W} \in \mathbb{R}^{N \times M}$  to have i.i.d. Gaussian entries, so  $\mathcal{C}_{\mu_Y}^{(\alpha)}(z) = \mathcal{C}_{\mu_W}^{(\alpha)}(z) = \frac{1}{\alpha} z$   
562 which leads to a simplification of saddle point equations (45):

$$\begin{cases} \zeta_1^* = \frac{1}{\alpha} p_2^*, & \zeta_2^* = \alpha z \frac{z \mathcal{G}_{\bar{\mu}_S}(z) - 1}{\alpha z \mathcal{G}_{\bar{\mu}_S}(z) + 1 - \alpha}, & \zeta_3^* = \frac{1}{\alpha} p_2^* \\ p_1^* = \mathcal{G}_{\bar{\mu}_S}(z), & p_2^* = \alpha \mathcal{G}_{\bar{\mu}_S}(z) + (1 - \alpha) \frac{1}{z}, & p_3^* = \frac{z - \zeta_1^*}{\zeta_3^*} \mathcal{G}_{\bar{\mu}_S}(z) - \frac{1}{\zeta_3^*} \end{cases} \tag{52}$$

#### 563 C.3.1 Resolvent relation

564 We take  $\kappa = 1$ . In model (29), without loss of generality we can consider  $\mathbf{X}$  to be diagonal. In figures  
565 5 and 6 respectively, we consider the  $\mathbf{X}$  to be a diagonal matrix obtained by taking the eigenvalues of  
566 a Wigner matrix and a Wishart matrix respectively.

567 Note that  $\mu_S$  and  $\mathcal{G}_{\bar{\mu}_S}(z)$  can be computed analytically using tools from random matrix theory, but the  
568 computation is highly involved. In our experiments, we use instead a numerical estimation of  $\mathcal{G}_{\bar{\mu}_S}(z)$

569 obtained from the observation matrix with the help of a Cauchy kernel to compute the parameters  
 570  $\zeta_1^*, \zeta_3^*$  (see section G, and [45] for details on the Cauchy kernel method).

571 Unlike the simpler models [15] for which the fluctuations are derived to be of the order  $1/\sqrt{N}$ , based  
 572 on our derivation we cannot assess the order of fluctuations. However, from our numerics we observe  
 573 that the fluctuations are of the order  $o(N)$ . Moreover, fluctuations near the edge points of density are  
 574 larger (in particular for the last row in both figures 5, 6), which is due to the fact that the limiting  
 575 measures have higher fluctuations on their edge-points.

576 Another observation, from comparison of figures 5, 6, is that the fluctuations for the first example are  
 577 relatively larger than the second one. One possible guess could be that this is due to the symmetry of  
 578  $\rho_X$  in the first example. However based on more extensive numerical observations (which we omit  
 579 here) we speculate that this issue is in fact related to the existence of small eigenvalues of  $\mathbf{X}$ . In other  
 580 words, if  $\mathbf{X}$  has eigenvalue 0 or small eigenvalues, we have higher fluctuations in the relation (47).

### 581 C.3.2 Overlaps

582 To illustrate the formula for the overlap (48), we fix the matrix  $\mathbf{X}$  and run experiments over various  
 583 realization of the model (29). For each experiment, we record the overlap of  $k$ -th left singular  
 584 vector of  $\mathbf{S}$  and the eigenvectors of  $\mathbf{X}$ . To compute the theoretical prediction, we find  $\zeta_1^* = \zeta_3^*$  for  
 585  $z = \bar{\gamma}_k - i0^+$  where  $\bar{\gamma}_k$  is the average of  $k$ -th singular value of  $\mathbf{S}$  in the experiments.

586 To find  $\zeta_1^* = \zeta_3^*$ , we use the set of equations (41) which for  $\mathbf{Y}, \mathbf{W}$  Gaussian can be written as:

$$\begin{cases} \zeta_1^* = \frac{1}{\alpha} p_2^*, & \zeta_2^* = p_1^* + p_3^*, & \zeta_3^* = \frac{1}{\alpha} p_2^* \\ p_1^* = \frac{1}{\zeta_1^*} \mathcal{G}_{\rho_{X^2}}\left(\frac{z}{\zeta_1^*} - 1\right), & p_2^* = \frac{1}{z - \zeta_2^*}, & p_3^* = \frac{z - \zeta_1^*}{\zeta_1^{*2}} \mathcal{G}_{\rho_{X^2}}\left(\frac{z}{\zeta_1^*} - 1\right) - \frac{1}{\zeta_1^*} \end{cases} \quad (53)$$

587 Now we proceed to simplify the solution above:

$$\zeta_2^* = p_1^* + p_3^* = \frac{z}{\zeta_1^{*2}} \mathcal{G}_{\rho_{X^2}}\left(\frac{z}{\zeta_1^*} - 1\right) - \frac{1}{\zeta_1^*}$$

$$p_2^* = \frac{1}{z - \zeta_2^*} = \frac{\zeta_1^*}{\zeta_1^* z - \frac{z}{\zeta_1^*} \mathcal{G}_{\rho_{X^2}}\left(\frac{z}{\zeta_1^*} - 1\right) + 1}$$

$$\begin{aligned} \zeta_1^* = \frac{1}{\alpha} p_2^* &\implies \zeta_1^* z - \frac{z}{\zeta_1^*} \mathcal{G}_{\rho_{X^2}}\left(\frac{z}{\zeta_1^*} - 1\right) + 1 = \frac{1}{\alpha} \\ &\implies \mathcal{G}_{\rho_{X^2}}\left(\frac{z}{\zeta_1^*} - 1\right) = \zeta_1^{*2} + \left(1 - \frac{1}{\alpha}\right) \frac{\zeta_1^*}{z} \\ &\implies \frac{z}{\zeta_1^*} - 1 = \mathcal{G}_{\rho_{X^2}}^{-1}\left(\zeta_1^{*2} + \left(1 - \frac{1}{\alpha}\right) \frac{\zeta_1^*}{z}\right) \\ &\implies \frac{z}{\zeta_1^*} - 1 - \frac{1}{\zeta_1^{*2} + \left(1 - \frac{1}{\alpha}\right) \frac{\zeta_1^*}{z}} = \mathcal{R}_{\rho_{X^2}}\left(\zeta_1^{*2} + \left(1 - \frac{1}{\alpha}\right) \frac{\zeta_1^*}{z}\right) \end{aligned} \quad (54)$$

590 Thus,  $\zeta_1^*$  is the solution to (54). For each example, we solve this equation and compare the obtained  
 591 theoretical overlap against the average over the experiments.

592 **Wigner  $\mathbf{X}$ .** Let  $\mathbf{X} \in \mathbb{R}^{N \times N}$  be a Wigner matrix, then  $\mathcal{R}_{\rho_{X^2}}(z) = \frac{1}{1-z}$ . Solving (54), we can  
 593 compute the overlap using (48). In Fig. 7a, we compare the theoretical computation with simulations  
 594 for  $N = 1000, M = 2000$ . As in previous cases  $\bar{\mu}_S(\gamma)$  is approximated using a Cauchy kernel [45].

595 **Square root Wishart  $\mathbf{X}$ .** Let  $\mathbf{X} \in \mathbb{R}^{N \times N}$  be the square root of a Wishart matrix  $\mathbf{X} = \sqrt{\frac{1}{N}} \mathbf{H} \mathbf{H}^\top$   
 596 with  $\mathbf{H} \in \mathbb{R}^{N \times N'}$  having i.i.d. Gaussian entries. Then  $\mathcal{R}_{\rho_{X^2}}(z) = \frac{1}{\alpha'} \frac{1}{1-z}$ ,  $\alpha' = N/N'$ . Solving (54),  
 597 we can compute the overlap using (48). In Fig. 7b, we compare the theoretical computation with  
 598 simulations for  $N = 1000, N' = 4000, M = 2000$ .

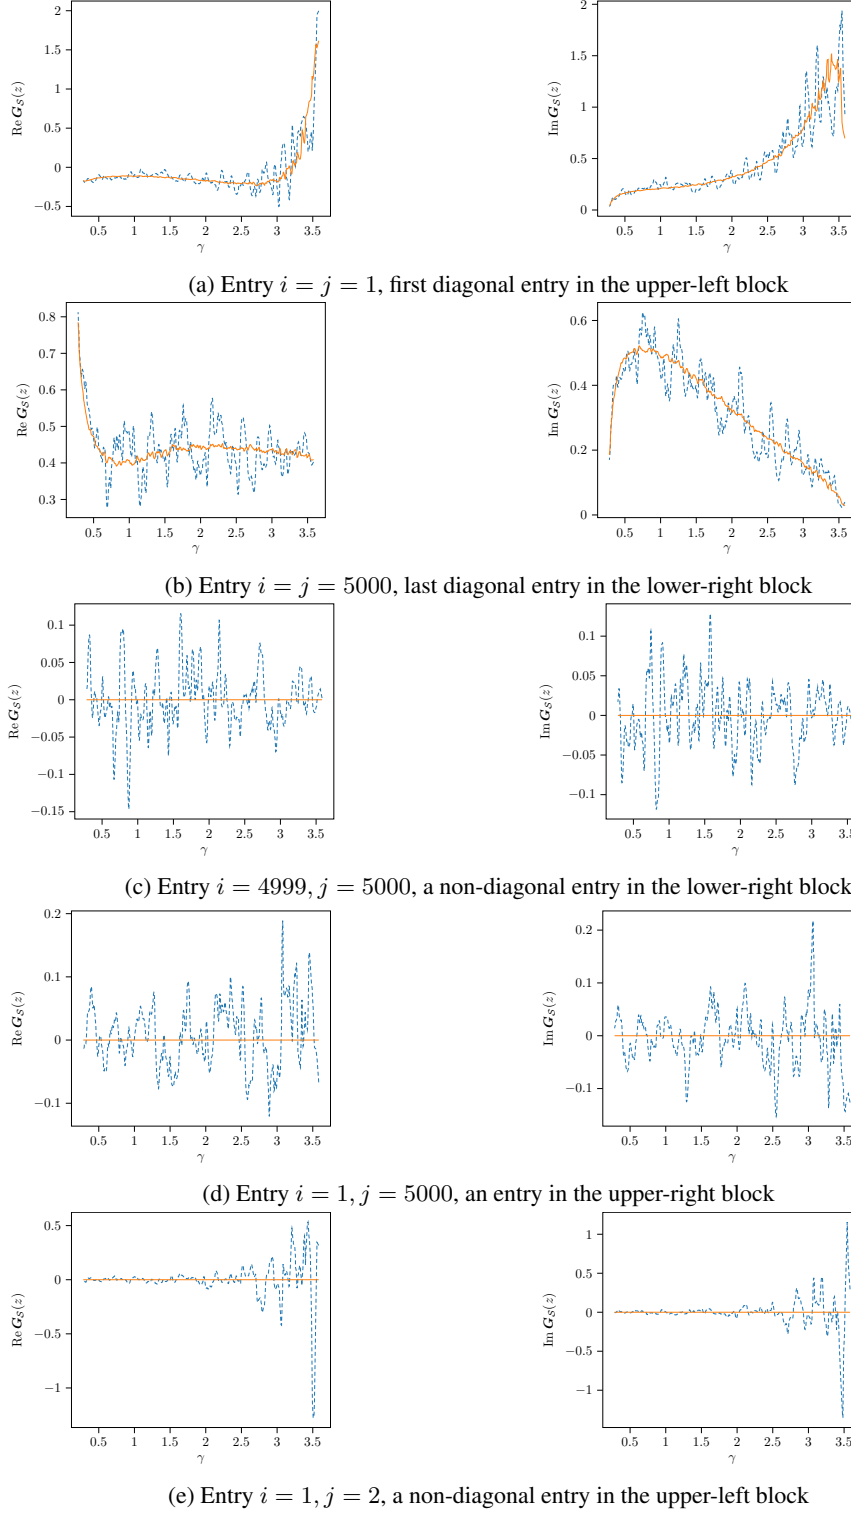

Figure 5: Illustration of (42).  $\mathbf{X}$  is diagonal matrix from the eigenvalues of a Wigner matrix and  $\mathbf{Y}, \mathbf{Z}$  are Gaussian matrices with  $N = 2000, M = 3000$ . The empirical estimate of  $\mathbf{G}_S(z)$  (dashed blue line) is computed for  $z = \gamma_i - i\sqrt{\frac{1}{2N}}$  for  $1 \leq i \leq N$ . Theoretical estimate (solid orange line) computed from the rhs of (42) with parameters obtained from the generated matrix. Note that, the theoretical estimate has also fluctuations because the parameters  $\zeta_1^*, \zeta_3^*$  are given by the numerical estimate of  $\mathcal{G}_{\bar{\mu}_S}(z)$ .

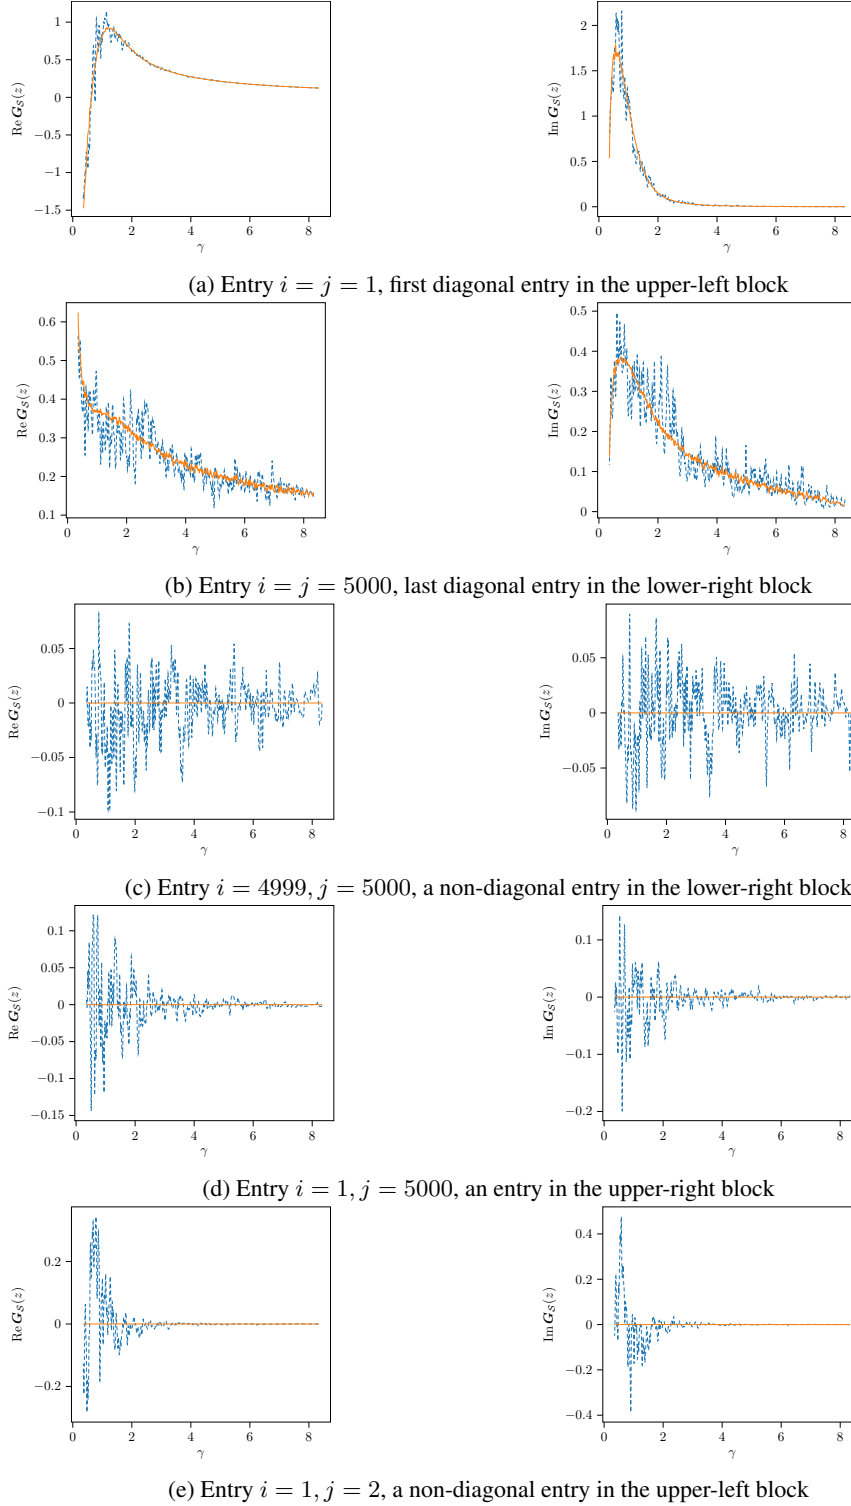

Figure 6: Illustration of (42).  $\mathbf{X}$  is diagonal matrix from the eigenvalues of a Wishart matrix with aspect ratio  $1/2$  and  $\mathbf{Y}, \mathbf{Z}$  are Gaussian matrices with  $N = 2000, M = 3000$ . The empirical estimate of  $\mathbf{G}_S(z)$  (dashed blue line) is computed for  $z = \gamma_i - i\sqrt{\frac{1}{2N}}$  for  $1 \leq i \leq N$ . The Theoretical estimate (solid orange line) is computed from the rhs of (42) with parameters obtained from the generated matrix. Note that, the theoretical estimate has also fluctuations because the parameters  $\zeta_1^*, \zeta_3^*$  are given by the numerical estimate of  $\mathcal{G}_{\bar{\mu}_S}(z)$ .

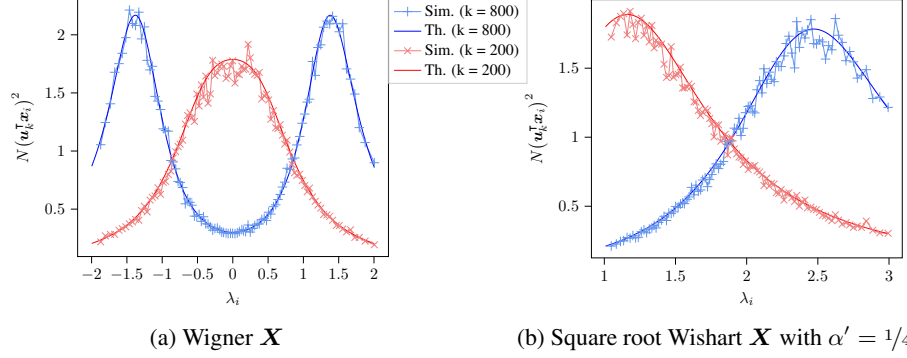

Figure 7: Computation of the rescaled overlap. Both  $\mathbf{Y}$  and  $\mathbf{W}$  are  $N \times M$  matrices with i.i.d. Gaussian entries of variance  $1/N$ , and aspect ratio  $N/M = 1/2$ . The simulation results are averaged over 1000 experiments with fixed  $\mathbf{X}$ , and  $N = 1000$ ,  $M = 2000$ . Some of the simulation points are dropped for clarity.

### 599 C.3.3 RIE performance

600 In this section, we investigate the performance of our proposed estimators for  $\mathbf{X}$ . We compare  
 601 performances of the optimal RIE (49) with the one of Oracle estimator (3). Moreover, we illustrate  
 602 the performance of the estimator for  $\mathbf{X}^2$  (50), and the sub-optimal estimator of  $\mathbf{X}$  derived from it,  
 603 see remark 4.

604 For  $\mathbf{Y}, \mathbf{W}$  with Gaussian i.i.d. entries, (51) simplifies to:

$$\begin{aligned}
 \widehat{\xi}_{x^2 i}^* &= \frac{1}{\kappa} \frac{1}{\pi \bar{\mu}_S(\gamma_i)} \operatorname{Im} \lim_{z \rightarrow \gamma_i - i0^+} \frac{z - \zeta_1^*}{\zeta_3^*} \mathcal{G}_{\bar{\mu}_S}(z) - \frac{1}{\zeta_3^*} \\
 &= \frac{1}{\kappa} \frac{1}{\pi \bar{\mu}_S(\gamma_i)} \operatorname{Im} \lim_{z \rightarrow \gamma_i - i0^+} \frac{z}{\zeta_1^*} \mathcal{G}_{\bar{\mu}_S}(z) - \mathcal{G}_{\bar{\mu}_S} - \frac{1}{\zeta_1^*} \\
 &= \frac{1}{\kappa} \frac{1}{\pi \bar{\mu}_S(\gamma_i)} \operatorname{Im} \lim_{z \rightarrow \gamma_i - i0^+} \frac{z}{\mathcal{G}_{\bar{\mu}_S}(z) + \frac{1-\alpha}{\alpha} \frac{1}{z}} \mathcal{G}_{\bar{\mu}_S}(z) - \mathcal{G}_{\bar{\mu}_S}(z) - \frac{1}{\mathcal{G}_{\bar{\mu}_S}(z) + \frac{1-\alpha}{\alpha} \frac{1}{z}} \\
 &= \frac{1}{\kappa} \frac{1}{\pi \bar{\mu}_S(\gamma_i)} \operatorname{Im} \left\{ \frac{\gamma_i}{\pi \mathcal{H}[\bar{\mu}_S](\gamma_i) + \pi i \bar{\mu}_S(\gamma_i) + \frac{1-\alpha}{\alpha} \frac{1}{\gamma_i}} (\pi \mathcal{H}[\bar{\mu}_S](\gamma_i) + \pi i \bar{\mu}_S(\gamma_i)) \right. \\
 &\quad \left. - (\pi \mathcal{H}[\bar{\mu}_S](\gamma_i) + \pi i \bar{\mu}_S(\gamma_i)) - \frac{1}{\pi \mathcal{H}[\bar{\mu}_S](\gamma_i) + \pi i \bar{\mu}_S(\gamma_i) + \frac{1-\alpha}{\alpha} \frac{1}{\gamma_i}} \right\} \\
 &= \frac{1}{\kappa} \frac{1}{\pi \bar{\mu}_S(\gamma_i)} \pi \bar{\mu}_S(\gamma_i) \left( -1 + \frac{1}{\alpha \left( \pi^2 \bar{\mu}_S(\gamma_i)^2 + \left( \pi \mathcal{H}[\bar{\mu}_S](\gamma_i) + \frac{-1+\frac{1}{\alpha}}{\gamma_i} \right)^2 \right)} \right) \\
 &= \frac{1}{\kappa} \left[ -1 + \frac{1}{\alpha \left( \pi^2 \bar{\mu}_S(\gamma_i)^2 + \left( \pi \mathcal{H}[\bar{\mu}_S](\gamma_i) + \frac{-1+\frac{1}{\alpha}}{\gamma_i} \right)^2 \right)} \right]
 \end{aligned} \tag{55}$$

605 For our first example, we consider two priors for  $\mathbf{X}$ :

606 **Shifted Wigner  $\mathbf{X}$ .** We consider  $\mathbf{X} = \mathbf{F} + c\mathbf{I}$  where  $\mathbf{F} = \mathbf{F}^\top \in \mathbb{R}^{N \times N}$  has i.i.d. entries with  
 607 variance  $1/N$ , and  $c \neq 0$  is a real number. Then, the spectrum of  $\mathbf{X}$  is a shifted version of the Wigner  
 608 law

$$\rho_X(\lambda) = \frac{\sqrt{4 - (\lambda - c)^2}}{2\pi}, \quad \text{for } c - 2 < \lambda < c + 2,$$

609 and the Stieltjes transform reads:

$$\mathcal{G}_{\rho_X}(z) = \frac{z - c - \sqrt{(z - 2 - c)(z + 2 - c)}}{2}$$



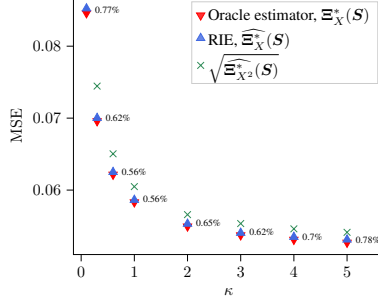

(a) Shifted Wigner,  $c = 3$

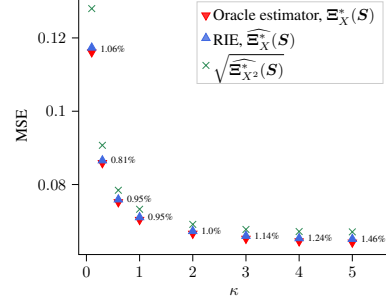

(b) Wishart,  $\alpha' = 1/4$

Figure 8: Estimating  $\mathbf{X}$ . The MSE is normalized by the norm of the signal,  $\|\mathbf{X}\|_F^2$ . Both  $\mathbf{Y}$  and  $\mathbf{W}$  are  $N \times M$  matrices with i.i.d. Gaussian entries of variance  $1/N$ , and aspect ratio  $N/M = 1/2$ . The RIE is applied to  $N = 2000$ ,  $M = 4000$ , and the results are averaged over 10 runs (error bars are invisible). Average relative error between RIE  $\Xi_X^*(S)$  and Oracle estimator is also reported.

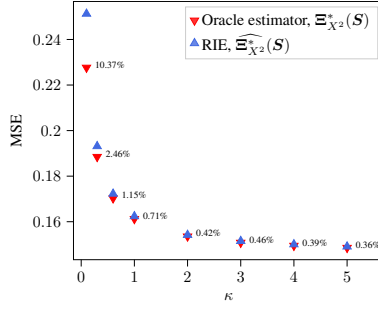

(a) Shifted Wigner,  $c = 3$

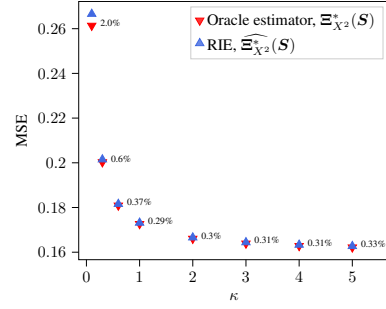

(b) Wishart,  $\alpha' = 1/4$

Figure 9: Estimating  $\mathbf{X}^2$ . The MSE is normalized by the norm of the signal,  $\|\mathbf{X}^2\|_F^2$ . Both  $\mathbf{Y}$  and  $\mathbf{W}$  are  $N \times M$  matrices with i.i.d. Gaussian entries of variance  $1/N$ , and aspect ratio  $N/M = 1/2$ . The RIE is applied to  $N = 2000$ ,  $M = 4000$ , and the results are averaged over 10 runs (error bars are invisible). Average relative error between RIE  $\Xi_{X^2}^*(S)$  and Oracle estimator is also reported.

610 **Wishart  $\mathbf{X}$ .** Take  $\mathbf{X} = \frac{1}{N}\mathbf{H}\mathbf{H}^\top$  with  $\mathbf{H} \in \mathbb{R}^{N \times N'}$  having i.i.d. Gaussian entries, with  $N/N' =$   
611  $\alpha' \leq 1$ . Then, the spectrum of  $\mathbf{X}$  is the renowned *Marchenko-Pastur* distribution:

$$\rho_X(\lambda) = \frac{\sqrt{\left[\lambda - \left(\frac{1}{\sqrt{\alpha'}} - 1\right)^2\right] \left[\left(\frac{1}{\sqrt{\alpha'}} + 1\right)^2 - \lambda\right]}}{2\pi\lambda}, \quad \text{for } \left(\frac{1}{\sqrt{\alpha'}} - 1\right)^2 < \lambda < \left(\frac{1}{\sqrt{\alpha'}} + 1\right)^2,$$

612 and the Stieltjes transform reads:

$$\mathcal{G}_{\rho_X}(z) = \frac{z - \left(\frac{1}{\alpha'} - 1\right) - \sqrt{\left[z - \left(\frac{1}{\sqrt{\alpha'}} - 1\right)^2\right] \left[z - \left(\frac{1}{\sqrt{\alpha'}} + 1\right)^2\right]}}{2z}$$

613 In Figure 8, the MSE of Oracle estimator, RIE (49), and  $\sqrt{\mathbf{X}^2}$ -RIE is illustrated for shifted Wigner  
614  $\mathbf{X}$  with  $c = 3$ , and Wishart with aspect-ratio  $\alpha' = 1/4$ . We see that the performance of RIE is close to  
615 the one of Oracle estimator, which implies the optimality of the proposed estimator (49). Moreover,

616 we observe the sub-optimality of estimating  $\mathbf{X}$  using  $\sqrt{\Xi_{X^2}^*(S)}$ . Note that, in the low-SNR regime,

617 the estimated eigenvalues  $\widehat{\xi}_{x^2, i}^*$  might be negative which makes the estimator  $\sqrt{\Xi_{X^2}^*(S)}$  undefined,  
618 so the MSE is not depicted in this case.

619 In Figure 9, the MSE of estimating  $\mathbf{X}^2$  is shown. We see that in the high-SNR regimes the RIE (55)  
620 has the same performance as the Oracle estimator.

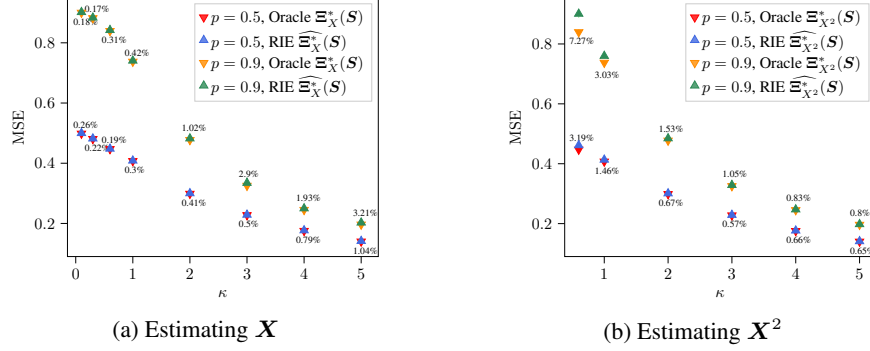

Figure 10: Estimating  $\mathbf{X}$  and  $\mathbf{X}^2$  with Bernoulli spectral prior distribution. The MSE is normalized by the norm of the signal,  $\|\mathbf{X}\|_F^2 = \|\mathbf{X}^2\|_F^2$ . Both  $\mathbf{Y}$  and  $\mathbf{W}$  are  $N \times M$  matrices with i.i.d. Gaussian entries of variance  $1/N$ , and aspect ratio  $N/M = 1/2$ . The RIE is applied to  $N = 2000$ ,  $M = 4000$ , and the results are averaged over 10 runs (error bars are invisible). Average relative error between RIE  $\widehat{\Xi}_X^*(S)$  and Oracle estimator is also reported.

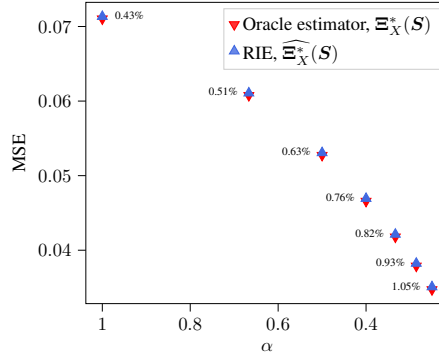

Figure 11: MSE of estimating  $\mathbf{X}$  as a function of aspect-ratio  $\alpha$ , prior on  $\mathbf{X}$  is shifted Wigner with  $c = 3$ , and  $\kappa = 5$ . MSE is normalized by the norm of the signal,  $\|\mathbf{X}\|_F^2$ . Both  $\mathbf{Y}$  and  $\mathbf{W}$  are  $N \times M$  matrices with i.i.d. Gaussian entries of variance  $1/N$ . The RIE is applied to  $N = 2000$ ,  $M = 1/\alpha N$ , and the results are averaged over 10 runs (error bars are invisible). Average relative error between RIE  $\widehat{\Xi}_X^*(S)$  and Oracle estimator is also reported.

**Bernoulli spectral distribution.** In this case, the matrix  $\mathbf{X}$  is constructed as  $\mathbf{X} = \mathbf{U}_X \mathbf{\Lambda} \mathbf{U}_X^T$  with  $\mathbf{U}_X$  a  $N \times N$  orthogonal matrix distributed according to Haar measure on orthogonal matrices, and  $\mathbf{\Lambda} = \text{diag}(\boldsymbol{\lambda})$  where  $\boldsymbol{\lambda}$  has i.i.d. Bernoulli elements. Thus,  $\rho_X = p\delta_0 + (1-p)\delta_{+1}$  for  $p \in (0, 1)$ , and the Stieltjes transform is:

$$\mathcal{G}_{\rho_X}(z) = p \frac{1}{z} + (1-p) \frac{1}{z-1}$$

For this prior, we have that  $\mathbf{X} = \mathbf{X}^2$ , so both estimators  $\widehat{\Xi}_X^*(S)$  and  $\widehat{\Xi}_{X^2}^*(S)$  should have the same performance. However, note that  $\widehat{\Xi}_{X^2}^*(S)$  does not use any knowledge of  $\rho_X$ . In Figure 10, the MSE is illustrated for these two estimators for two sparsity parameter,  $p = 0.5$  and  $0.9$ . We observe that, except for the low-SNR regimes, both estimators have the same MSE. The poor performance of  $\widehat{\Xi}_{X^2}^*(S)$  in the low-SNR regimes might be due to the fact that, some of the estimated eigenvalues  $\widehat{\xi}_{X^2, i}^*$  are negative although the true eigenvalue is 0. This makes the estimation more difficult for the sparser prior, see Figure 10b. However, this problem is resolved in  $\widehat{\Xi}_X^*(S)$  by taking the knowledge of  $\mathcal{G}_{\rho_X}(z)$  into account.

**Effect of aspect-ratio  $\alpha$ .** In Figure 11, we consider  $\mathbf{X}$  to be shifted Wigner with  $c = 3$ , and the MSE is depicted for various values of the aspect-ratio  $\alpha$ . As expected, as  $M$  increases ( $\alpha$  decreases) and we have more observation or more data samples, the estimation error decreases.

## D Estimating $\mathbf{Y}$

In this section, we present the derivation of the optimal RIE for  $\mathbf{Y}$ . For simplicity, the SNR parameter in (1) is absorbed into  $\mathbf{Y}$ , so the model is  $\mathbf{S} = \mathbf{X}\mathbf{Y} + \mathbf{W}$ . Therefore, the final estimator should be divided by  $1/\sqrt{\kappa}$  to give an estimate of the original  $\mathbf{Y}$ .

The optimal singular values are constructed as  $\xi_{y_i}^* = \sum_{j=1}^N \sigma_j (\mathbf{u}_i^\top \mathbf{y}_j^{(l)}) (\mathbf{v}_i^\top \mathbf{y}_j^{(r)})$ . We assume that, for large  $N$ ,  $\xi_{y_i}^*$  can be approximated by its expectation:

$$\hat{\xi}_{y_i}^* \approx \sum_{j=1}^N \sigma_j \mathbb{E} \left[ (\mathbf{u}_i^\top \mathbf{y}_j^{(l)}) (\mathbf{v}_i^\top \mathbf{y}_j^{(r)}) \right]$$

where the expectation is over the singular vectors of the observation matrix  $\mathbf{S}$ . Therefore, to compute the optimal singular values, we need to find the mean overlap  $\mathbb{E} \left[ (\mathbf{u}_i^\top \mathbf{y}_j^{(l)}) (\mathbf{v}_i^\top \mathbf{y}_j^{(r)}) \right]$  between singular vectors of  $\mathbf{Y}$  and singular vectors of  $\mathbf{S}$ . In the following we will see that (a rescaling of) this quantity can be expressed in terms of  $i$ -th singular value of  $\mathbf{S}$  and  $j$ -th singular value of  $\mathbf{Y}$  (and the limiting measures, indeed). Thus, we will use the notation  $O_Y(\gamma_i, \sigma_j) := N \mathbb{E} \left[ (\mathbf{u}_i^\top \mathbf{y}_j^{(l)}) (\mathbf{v}_i^\top \mathbf{y}_j^{(r)}) \right]$  in what follows. In the next section, we discuss how the overlap can be computed from the resolvent of the Hermitized matrix of  $\mathbf{S}$ .

### D.1 Relation between overlap and the resolvent

Construct the matrix  $\mathcal{S} \in \mathbb{R}^{(N+M) \times (N+M)}$  from the observation matrix:

$$\mathcal{S} = \begin{bmatrix} \mathbf{0}_{N \times N} & \mathbf{S} \\ \mathbf{S}^\top & \mathbf{0}_{M \times M} \end{bmatrix}$$

By Theorem 7.3.3 in [46],  $\mathcal{S}$  has the following eigen-decomposition:

$$\mathcal{S} = \begin{bmatrix} \hat{\mathbf{U}}_S & \hat{\mathbf{U}}_S & \mathbf{0} \\ \hat{\mathbf{V}}_S^{(1)} & -\hat{\mathbf{V}}_S^{(1)} & \mathbf{V}_S^{(2)} \end{bmatrix} \begin{bmatrix} \mathbf{\Gamma}_N^N & \mathbf{0} & \mathbf{0} \\ \mathbf{0} & -\mathbf{\Gamma}_N^N & \mathbf{0} \\ \mathbf{0} & \mathbf{0} & \mathbf{0} \end{bmatrix} \begin{bmatrix} \hat{\mathbf{U}}_S & \hat{\mathbf{U}}_S & \mathbf{0} \\ \hat{\mathbf{V}}_S^{(1)} & -\hat{\mathbf{V}}_S^{(1)} & \mathbf{V}_S^{(2)} \end{bmatrix}^\top \quad (56)$$

with  $\mathbf{V}_S = \begin{bmatrix} \mathbf{V}_S^{(1)} & \mathbf{V}_S^{(2)} \end{bmatrix}$  in which  $\mathbf{V}_S^{(1)} \in \mathbb{R}^{M \times N}$ . And,  $\hat{\mathbf{V}}_S^{(1)} = \frac{1}{\sqrt{2}} \mathbf{V}_S^{(1)}$ ,  $\hat{\mathbf{U}}_S = \frac{1}{\sqrt{2}} \mathbf{U}_S$ .

Eigenvalues of  $\mathcal{S}$  are signed singular values of  $\mathbf{S}$ , therefore the limiting eigenvalue distribution of  $\mathcal{S}$  (ignoring zero eigenvalues) is the same as the limiting symmetrized singular value distribution of  $\mathbf{S}$ .

Define the resolvent of  $\mathcal{S}$

$$\mathbf{G}_S(z) = (z\mathbf{I} - \mathcal{S})^{-1}$$

Denote the eigenvectors of  $\mathcal{S}$  by  $\mathbf{s}_i \in \mathbb{R}^{M+N}$ ,  $i = 1, \dots, M+N$ . For  $z = x - i\epsilon$  with  $x \in \mathbb{R}$  and  $\epsilon \gg \frac{1}{N}$ , we have:

$$\mathbf{G}_S(x - i\epsilon) = \sum_{k=1}^{2N} \frac{x + i\epsilon}{(x - \tilde{\gamma}_k)^2 + \epsilon^2} \mathbf{s}_k \mathbf{s}_k^\top + \frac{x + i\epsilon}{x^2 + \epsilon^2} \sum_{k=2N+1}^{N+M} \mathbf{s}_k \mathbf{s}_k^\top$$

where  $\tilde{\gamma}_k$  are the eigenvalues of  $\mathcal{S}$ , which are in fact the (signed) singular values of  $\mathbf{S}$ ,  $\tilde{\gamma}_1 = \gamma_1, \dots, \tilde{\gamma}_N = \gamma_N, \tilde{\gamma}_{N+1} = -\gamma_1, \dots, \tilde{\gamma}_{2N} = -\gamma_N$ .

Define the vectors  $\mathbf{r}_i = \begin{bmatrix} \mathbf{0}_N \\ \mathbf{y}_i^{(r)} \end{bmatrix}$ ,  $\mathbf{l}_i = \begin{bmatrix} \mathbf{y}_i^{(l)} \\ \mathbf{0}_M \end{bmatrix}$  for  $\mathbf{y}_i^{(r)}, \mathbf{y}_i^{(l)}$  right/ left singular vectors of  $\mathbf{Y}$ , we have

$$\mathbf{r}_i^\top (\text{Im } \mathbf{G}_S(x - i\epsilon)) \mathbf{l}_i = \sum_{k=1}^{2N} \frac{\epsilon}{(x - \tilde{\gamma}_k)^2 + \epsilon^2} (\mathbf{r}_i^\top \mathbf{s}_k) (\mathbf{l}_i^\top \mathbf{s}_k) + \frac{x + i\epsilon}{x^2 + \epsilon^2} \sum_{k=2N+1}^{N+M} (\mathbf{r}_i^\top \mathbf{s}_k) (\mathbf{l}_i^\top \mathbf{s}_k) \quad (57)$$

Given the structure of  $\mathbf{s}_k$ 's in (56), we have:

$$(\mathbf{r}_i^\top \mathbf{s}_k) (\mathbf{l}_i^\top \mathbf{s}_k) = \begin{cases} \frac{1}{2} (\mathbf{u}_i^\top \mathbf{y}_i^{(l)}) (\mathbf{v}_i^\top \mathbf{y}_i^{(r)}) & \text{for } 1 \leq k \leq N \\ -\frac{1}{2} (\mathbf{u}_{k-N}^\top \mathbf{y}_i^{(l)}) (\mathbf{v}_{k-N}^\top \mathbf{y}_i^{(r)}) & \text{for } N+1 \leq k \leq 2N \\ 0 & \text{for } 2N+1 \leq k \leq N+M \end{cases}$$

663 In the limit of large  $N$ , the latter quantity is also self-averaging, due to the fact that as  $N \rightarrow \infty$ , these  
 664 overlaps exhibit asymptotic independence, enabling the law of large numbers to be applied here. We  
 665 can thus state that:

$$\mathbf{r}_i^\top (\text{Im } \mathbf{G}_S(x - i\epsilon)) \mathbf{l}_i \xrightarrow{N \rightarrow \infty} \int_{\mathbb{R}} \frac{\epsilon}{(x-t)^2 + \epsilon^2} O_Y(t, \sigma_i) \bar{\mu}_S(t) dt \quad (58)$$

666 where the overlap function  $O_Y(t, \lambda_i)$  is extended (continuously) to arbitrary values within the support  
 667 of  $\bar{\mu}_S$  with the property that  $O_Y(-t, \lambda_i) = -O_Y(t, \lambda_i)$  for  $t \in \text{supp}(\mu_S)$ . Sending  $\epsilon \rightarrow 0$ , we find

$$\mathbf{r}_i^\top (\text{Im } \mathbf{G}_S(x - i\epsilon)) \mathbf{l}_i \approx \pi \bar{\mu}_S(x) O_Y(x, \sigma_i) \quad (59)$$

668 In the next section, we establish a connection between the resolvent  $\mathbf{G}_S(z)$  and the signal  $\mathbf{Y}$ , which  
 669 enables us to determine the overlap and consequently the optimal singular values values  $\hat{\xi}_{y_i}^*$  in terms  
 670 of the singular values of the observation matrix  $\mathbf{S}$ .

## 671 D.2 Resolvent relation for $\mathbf{Y}$

672 In this section, we consider estimating  $\mathbf{Y}$ , and treat both  $\mathbf{X}$  and  $\mathbf{W}$  as noise. We consider the model  
 673 to be:

$$\mathbf{S} = \mathbf{O} \mathbf{X} \mathbf{O}^\top \mathbf{Y} + \mathbf{U} \mathbf{W} \mathbf{V}^\top \quad (60)$$

674 where  $\mathbf{X} = \mathbf{X}^\top \in \mathbb{R}^{N \times N}$ ,  $\mathbf{W} \in \mathbb{R}^{N \times M}$  are fixed matrices with limiting eigenvalue/singular value  
 675 distribution  $\rho_X, \mu_W$ , and  $\mathbf{O}, \mathbf{U} \in \mathbb{R}^{N \times N}$ ,  $\mathbf{V} \in \mathbb{R}^{M \times M}$  are independent random Haar matrices. For  
 676 simplicity of notation, we use  $\mathbf{T} \equiv \mathbf{O} \mathbf{X} \mathbf{O}^\top \mathbf{Y}$ , and  $\mathcal{T} \in \mathbb{R}^{(N+M) \times (N+M)}$  the hermitization of  $\mathbf{T}$ .  
 677 And  $\tilde{\mathbf{W}}$  denotes the hermitization of the matrix  $\mathbf{U} \mathbf{W} \mathbf{V}^\top$ .

678 As in the case for  $\mathbf{X}$ , we express the entries of  $\mathbf{G}(z) \equiv \mathbf{G}_S(z)$  using Gaussian integral representation,  
 679 and after applying the replica trick (28), we find:

$$\begin{aligned} \langle G_{ij}(z) \rangle &= \lim_{n \rightarrow \infty} \int \left( \prod_{k=1}^{N+M} \prod_{\tau=1}^n d\eta_k^{(\tau)} \right) \eta_i^{(1)} \eta_j^{(1)} \left\langle \exp \left\{ -\frac{1}{2} \sum_{\tau=1}^n \boldsymbol{\eta}^{(\tau)\top} (z\mathbf{I} - \mathbf{S}) \boldsymbol{\eta}^{(\tau)} \right\} \right\rangle_{\mathbf{O}, \mathbf{U}, \mathbf{V}} \\ &= \lim_{n \rightarrow \infty} \int \left( \prod_{k=1}^{N+M} \prod_{\tau=1}^n d\eta_k^{(\tau)} \right) \eta_i^{(1)} \eta_j^{(1)} \exp \left\{ -\frac{z}{2} \sum_{\tau=1}^n \boldsymbol{\eta}^{(\tau)\top} \boldsymbol{\eta}^{(\tau)} \right\} \\ &\quad \times \left\langle \exp \left\{ \frac{1}{2} \sum_{\tau=1}^n \boldsymbol{\eta}^{(\tau)\top} \mathcal{T} \boldsymbol{\eta}^{(\tau)} \right\} \right\rangle_{\mathbf{O}} \left\langle \exp \left\{ \frac{1}{2} \sum_{\tau=1}^n \boldsymbol{\eta}^{(\tau)\top} \tilde{\mathbf{W}} \boldsymbol{\eta}^{(\tau)} \right\} \right\rangle_{\mathbf{U}, \mathbf{V}} \end{aligned} \quad (61)$$

680 Split each replica  $\boldsymbol{\eta}^{(\tau)}$  into two vectors  $\mathbf{a}^{(\tau)} \in \mathbb{R}^N, \mathbf{b}^{(\tau)} \in \mathbb{R}^M, \boldsymbol{\eta}^{(\tau)} = \begin{bmatrix} \mathbf{a}^{(\tau)} \\ \mathbf{b}^{(\tau)} \end{bmatrix}$ . The exponent in  
 681 the first bracket in (61) can be written as :

$$\begin{aligned} \boldsymbol{\eta}^{(\tau)\top} \mathcal{T} \boldsymbol{\eta}^{(\tau)} &= \mathbf{a}^{(\tau)\top} \mathbf{O} \mathbf{X} \mathbf{O}^\top \mathbf{Y} \mathbf{b}^{(\tau)} + \mathbf{b}^{(\tau)\top} \mathbf{Y}^\top \mathbf{O} \mathbf{X} \mathbf{O}^\top \mathbf{a}^{(\tau)} \\ &= \text{Tr } \mathbf{O} \mathbf{X} \mathbf{O}^\top \underbrace{(\mathbf{Y} \mathbf{b}^{(\tau)} \mathbf{a}^{(\tau)\top} + \mathbf{a}^{(\tau)} \mathbf{b}^{(\tau)\top} \mathbf{Y}^\top)}_{\tilde{\mathbf{Y}}^{(\tau)}} \end{aligned} \quad (62)$$

682 where  $\tilde{\mathbf{Y}}^{(\tau)}$  is a symmetric  $N \times N$  matrix with two non-zero eigenvalues  $\mathbf{a}^{(\tau)\top} \mathbf{Y} \mathbf{b}^{(\tau)} \pm$   
 683  $\|\mathbf{a}^{(\tau)}\| \|\mathbf{Y} \mathbf{b}^{(\tau)}\|$  by lemma 3.

684 Using the formula for the spherical integral [19] (see Theorem 1 in H.1), we find:

$$\begin{aligned} \left\langle \exp \left\{ \frac{1}{2} \sum_{\tau=1}^n \text{Tr } \mathbf{O} \mathbf{X} \mathbf{O}^\top \tilde{\mathbf{Y}}^{(\tau)} \right\} \right\rangle_{\mathbf{O}} &\approx \exp \left\{ \frac{N}{2} \sum_{\tau=1}^n \mathcal{P}_{\rho_X} \left( \frac{1}{N} (\mathbf{a}^{(\tau)\top} \mathbf{Y} \mathbf{b}^{(\tau)} + \|\mathbf{a}^{(\tau)}\| \|\mathbf{Y} \mathbf{b}^{(\tau)}\|) \right) \right. \\ &\quad \left. + \mathcal{P}_{\rho_X} \left( \frac{1}{N} (\mathbf{a}^{(\tau)\top} \mathbf{Y} \mathbf{b}^{(\tau)} - \|\mathbf{a}^{(\tau)}\| \|\mathbf{Y} \mathbf{b}^{(\tau)}\|) \right) \right\} \end{aligned} \quad (63)$$

685 By the same computation as previous section, for the second bracket we have:

$$\left\langle \exp \left\{ \sum_{\tau=1}^n \text{Tr} \mathbf{b}^{(\tau)} \mathbf{a}^{(\tau)\top} \mathbf{U} \mathbf{W} \mathbf{V}^\top \right\} \right\rangle_{\mathbf{U}, \mathbf{V}} \approx \exp \left\{ \frac{N}{2} \sum_{\tau=1}^n \mathcal{Q}_{\mu\mathbf{W}}^{(\alpha)} \left( \frac{1}{NM} \|\mathbf{a}^{(\tau)}\|^2 \|\mathbf{b}^{(\tau)}\|^2 \right) \right\} \quad (64)$$

686 From (61), (63), (64), we find:

$$\begin{aligned} \langle G_{ij}(z) \rangle &= \lim_{n \rightarrow \infty} \int \left( \prod_{k=1}^{N+M} \prod_{\tau=1}^n d\eta_k^{(\tau)} \right) \eta_i^{(1)} \eta_j^{(1)} \\ &\times \exp \left\{ -\frac{1}{2} \sum_{\tau=1}^n \left[ z \|\boldsymbol{\eta}^{(\tau)}\|^2 - N \mathcal{Q}_{\mu\mathbf{W}}^{(\alpha)} \left( \frac{1}{NM} \|\mathbf{a}^{(\tau)}\|^2 \|\mathbf{b}^{(\tau)}\|^2 \right) \right. \right. \\ &\quad \left. \left. - N \mathcal{P}_{\rho\mathbf{X}} \left( \frac{1}{N} (\mathbf{a}^{(\tau)\top} \mathbf{Y} \mathbf{b}^{(\tau)} + \|\mathbf{a}^{(\tau)}\| \|\mathbf{Y} \mathbf{b}^{(\tau)}\|) \right) \right. \right. \\ &\quad \left. \left. - N \mathcal{P}_{\rho\mathbf{X}} \left( \frac{1}{N} (\mathbf{a}^{(\tau)\top} \mathbf{Y} \mathbf{b}^{(\tau)} - \|\mathbf{a}^{(\tau)}\| \|\mathbf{Y} \mathbf{b}^{(\tau)}\|) \right) \right] \right\} \end{aligned} \quad (65)$$

687 Now, we introduce delta functions (for brevity we drop the limit term):

$$\begin{aligned} \langle G_{ij}(z) \rangle &= \int \left( \prod_{k=1}^{N+M} \prod_{\tau=1}^n d\eta_k^{(\tau)} \right) \left( \prod_{\tau=1}^n dp_1^{(\tau)} dq_2^{(\tau)} dq_3^{(\tau)} dq_4^{(\tau)} \right) \eta_i^{(1)} \eta_j^{(1)} \\ &\times \prod_{\tau=1}^n \delta(q_1^{(\tau)} - \frac{1}{N} \|\mathbf{a}^{(\tau)}\|^2) \delta(q_2^{(\tau)} - \frac{1}{M} \|\mathbf{b}^{(\tau)}\|^2) \\ &\quad \times \delta(q_3^{(\tau)} - \frac{1}{N} \|\mathbf{Y} \mathbf{b}^{(\tau)}\|^2) \delta(q_4^{(\tau)} - \frac{1}{N} \mathbf{a}^{(\tau)\top} \mathbf{Y} \mathbf{b}^{(\tau)}) \\ &\times \exp \left\{ -\frac{1}{2} \sum_{\tau=1}^n z \|\boldsymbol{\eta}^{(\tau)}\|^2 - N \mathcal{Q}_{\mu\mathbf{W}}^{(\alpha)}(q_1^{(\tau)} q_2^{(\tau)}) \right. \\ &\quad \left. - N \mathcal{P}_{\rho\mathbf{X}}(q_4^{(\tau)} + \sqrt{q_1^{(\tau)} q_3^{(\tau)}}) - N \mathcal{P}_{\rho\mathbf{X}}(q_4^{(\tau)} - \sqrt{q_1^{(\tau)} q_3^{(\tau)}}) \right\} \end{aligned} \quad (66)$$

688 In the next step, we replace each delta with its Fourier transform. Note that for the parameters  
 689  $q_1, q_2, q_3$  we use  $\delta(q_1^\tau - \frac{1}{N} \|\mathbf{a}^\tau\|^2) \propto \int d\beta_1^\tau \exp \left\{ -\frac{N}{2} \beta_1^\tau (q_1^\tau - \frac{1}{N} \|\mathbf{a}^\tau\|^2) \right\}$ , and for  $q_4$  we use  
 690  $\delta(q_4^{(\tau)} - \frac{1}{N} \mathbf{a}^{(\tau)\top} \mathbf{Y} \mathbf{b}^{(\tau)}) \propto \int d\beta_1^\tau \exp \left\{ -N \beta_1^\tau (q_4^{(\tau)} - \frac{1}{N} \mathbf{a}^{(\tau)\top} \mathbf{Y} \mathbf{b}^{(\tau)}) \right\}$ . After rearranging, we  
 691 find:

$$\begin{aligned} \langle G_{ij}(z) \rangle &\propto \int \left( \prod_{\tau=1}^n dq_1^{(\tau)} dq_2^{(\tau)} dq_3^{(\tau)} dq_4^{(\tau)} d\beta_1^{(\tau)} d\beta_2^{(\tau)} d\beta_3^{(\tau)} d\beta_4^{(\tau)} \right) \\ &\times \exp \left\{ \frac{N}{2} \sum_{\tau=1}^n \mathcal{Q}_{\mu\mathbf{W}}^{(\alpha)}(q_1^{(\tau)} q_2^{(\tau)}) + \mathcal{P}_{\rho\mathbf{X}}(q_4^{(\tau)} + \sqrt{q_1^{(\tau)} q_3^{(\tau)}}) + \mathcal{P}_{\rho\mathbf{X}}(q_4^{(\tau)} - \sqrt{q_1^{(\tau)} q_3^{(\tau)}}) \right. \\ &\quad \left. - \beta_1^{(\tau)} q_1^{(\tau)} - \frac{1}{\alpha} \beta_2^{(\tau)} q_2^{(\tau)} - \beta_3^{(\tau)} q_3^{(\tau)} - 2\beta_4^{(\tau)} q_4^{(\tau)} \right\} \\ &\times \int \left( \prod_{k=1}^{N+M} \prod_{\tau=1}^n d\eta_k^{(\tau)} \right) \eta_i^{(1)} \eta_j^{(1)} \exp \left\{ -\frac{1}{2} \sum_{\tau=1}^n z \|\boldsymbol{\eta}^{(\tau)}\|^2 - \beta_1^{(\tau)} \|\mathbf{a}^{(\tau)}\|^2 - \beta_2^{(\tau)} \|\mathbf{b}^{(\tau)}\|^2 \right. \\ &\quad \left. - \beta_3^{(\tau)} \|\mathbf{Y} \mathbf{b}^{(\tau)}\|^2 - 2\beta_4^{(\tau)} \mathbf{a}^{(\tau)\top} \mathbf{Y} \mathbf{b}^{(\tau)} \right\} \end{aligned} \quad (67)$$

692 The inner integral is a Gaussian integral, and can be written as:

$$\int \left( \prod_{k=1}^{N+M} \prod_{\tau=1}^n d\eta_k^{(\tau)} \right) \eta_i^{(1)} \eta_j^{(1)} \times \exp \left\{ \sum_{\tau=1}^n -\frac{1}{2} \boldsymbol{\eta}^{(\tau)\top} \begin{bmatrix} (z - \beta_1^{(\tau)}) \mathbf{I}_N & -\beta_4^{(\tau)} \mathbf{Y} \\ -\beta_4^{(\tau)} \mathbf{Y}^\top & (z - \beta_2^{(\tau)}) \mathbf{I}_M - \beta_3^{(\tau)} \mathbf{Y}^\top \mathbf{Y} \end{bmatrix} \boldsymbol{\eta}^{(\tau)} \right\} \quad (68)$$

693 Denote the matrix in the exponent by  $\mathbf{C}_Y^{(\tau)}$ . Using the formula for determinant of block matrices (see  
694 proposition 2.8.4 in [48]), we have::

$$\begin{aligned} \det \mathbf{C}_Y^{(\tau)} &= \det \left[ (z - \beta_1^{(\tau)}) \mathbf{I}_N - \beta_4^{(\tau)^2} \mathbf{Y} ((z - \beta_2^{(\tau)}) \mathbf{I}_M - \beta_3^{(\tau)} \mathbf{Y}^\top \mathbf{Y})^{-1} \mathbf{Y}^\top \right] \\ &\quad \times \det [(z - \beta_2^{(\tau)}) \mathbf{I}_M - \beta_3^{(\tau)} \mathbf{Y}^\top \mathbf{Y}] \\ &= \prod_{k=1}^N \left[ z - \beta_1^{(\tau)} - \beta_4^{(\tau)^2} \frac{\sigma_k^2}{z - \beta_2^{(\tau)} - \beta_3^{(\tau)} \sigma_k^2} \right] \prod_{k=1}^N (z - \beta_2^{(\tau)} - \beta_3^{(\tau)} \sigma_k^2) (z - \beta_2^{(\tau)})^{M-N} \\ &= (z - \beta_2^{(\tau)})^{M-N} \prod_{k=1}^N [(z - \beta_1^{(\tau)})(z - \beta_2^{(\tau)} - \beta_3^{(\tau)} \sigma_k^2) - \beta_4^{(\tau)^2} \sigma_k^2] \\ &= (z - \beta_2^{(\tau)})^{M-N} \prod_{k=1}^N [(z - \beta_1^{(\tau)})(z - \beta_2^{(\tau)}) - (\beta_4^{(\tau)^2} + \beta_3^{(\tau)}(z - \beta_1^{(\tau)})) \sigma_k^2] \end{aligned}$$

695 where  $\sigma_k$ 's are the singular values of  $\mathbf{Y}$ . So computing the Gaussian integrals, (67) can be written as:

$$\begin{aligned} \langle G_{ij}(z) \rangle &\propto \int \left( \prod_{\tau=1}^n dq_1^{(\tau)} dq_2^{(\tau)} dq_3^{(\tau)} dq_4^{(\tau)} d\beta_1^{(\tau)} d\beta_2^{(\tau)} d\beta_3^{(\tau)} d\beta_4^{(\tau)} \right) (\mathbf{C}_Y^{(1)})^{-1}_{ij} \\ &\quad \times \exp \left\{ -\frac{Nn}{2} F_0^Y(\mathbf{q}_1, \mathbf{q}_2, \mathbf{q}_3, \mathbf{q}_4, \beta_1, \beta_2, \beta_3, \beta_4) \right\} \quad (69) \end{aligned}$$

696 with

$$\begin{aligned} F_0^Y(\mathbf{q}_1, \mathbf{q}_2, \mathbf{q}_3, \mathbf{q}_4, \beta_1, \beta_2, \beta_3, \beta_4) &= \frac{1}{n} \sum_{\tau=1}^n \left[ \left( \frac{1}{\alpha} - 1 \right) \ln(z - \beta_2^{(\tau)}) \right. \\ &\quad + \frac{1}{N} \sum_{k=1}^N \ln \left( (z - \beta_1^{(\tau)})(z - \beta_2^{(\tau)}) - (\beta_4^{(\tau)^2} + \beta_3^{(\tau)}(z - \beta_1^{(\tau)})) \sigma_k^2 \right) \\ &\quad - \mathcal{Q}_{\mu_W}^{(\alpha)}(q_1^{(\tau)} q_2^{(\tau)}) - \mathcal{P}_{\rho_X}(q_4^{(\tau)} + \sqrt{q_1^{(\tau)} q_3^{(\tau)}}) - \mathcal{P}_{\rho_X}(q_4^{(\tau)} - \sqrt{q_1^{(\tau)} q_3^{(\tau)}}) \\ &\quad \left. + \beta_1^{(\tau)} q_1^{(\tau)} + \frac{1}{\alpha} \beta_2^{(\tau)} q_2^{(\tau)} + \beta_3^{(\tau)} q_3^{(\tau)} + 2\beta_4^{(\tau)} q_4^{(\tau)} \right] \quad (70) \end{aligned}$$

697 We will evaluate the integral (67) using saddle-points of the function  $F_0^Y$ . From the *replica symmetric*  
698 *ansatz* at the saddle-point we have:

$$\forall \tau \in \{1, \dots, n\} : \quad \begin{cases} q_1^\tau = q_1, & q_2^\tau = q_2, & q_3^\tau = q_3, & q_4^\tau = q_4 \\ \beta_1^\tau = \beta_1, & \beta_2^\tau = \beta_2, & \beta_3^\tau = \beta_3, & \beta_4^\tau = \beta_4 \end{cases}$$

699 Finally, we find the solution to be:

$$\begin{cases}
\beta_1^* = \frac{C_{\mu_W}^{(\alpha)}(q_1^* q_2^*)}{q_1^*} + \frac{1}{2} \sqrt{\frac{q_3^*}{q_1^*}} \left( \mathcal{R}_{\rho_X}(q_4^* + \sqrt{q_1^* q_3^*}) - \mathcal{R}_{\rho_X}(q_4^* - \sqrt{q_1^* q_3^*}) \right) \\
\beta_2^* = \alpha \frac{C_{\mu_W}^{(\alpha)}(q_1^* q_2^*)}{q_2^*} \\
\beta_3^* = \frac{1}{2} \sqrt{\frac{q_1^*}{q_3^*}} \left( \mathcal{R}_{\rho_X}(q_4^* + \sqrt{q_1^* q_3^*}) - \mathcal{R}_{\rho_X}(q_4^* - \sqrt{q_1^* q_3^*}) \right) \\
\beta_4^* = \frac{1}{2} \left( \mathcal{R}_{\rho_X}(q_4^* + \sqrt{q_1^* q_3^*}) + \mathcal{R}_{\rho_X}(q_4^* - \sqrt{q_1^* q_3^*}) \right) \quad \text{with } \begin{cases} Z_1(z) = (z - \beta_1^*)(z - \beta_2^*) \\ Z_2(z) = \beta_4^{*2} + \beta_3^*(z - \beta_1^*) \end{cases} \\
q_1^* = \frac{(z - \beta_2^*)\beta_4^{*2}}{Z_2(z)^2} \mathcal{G}_{\rho_Y}\left(\frac{Z_1(z)}{Z_2(z)}\right) + \frac{\beta_3^*}{Z_2(z)} \\
q_2^* = \alpha \frac{z - \beta_1^*}{Z_2(z)} \mathcal{G}_{\rho_Y}\left(\frac{Z_1(z)}{Z_2(z)}\right) + \frac{1 - \alpha}{z - \beta_2^*} \\
q_3^* = \frac{(z - \beta_1^*)Z_1(z)}{Z_2(z)^2} \mathcal{G}_{\rho_Y}\left(\frac{Z_1(z)}{Z_2(z)}\right) - \frac{z - \beta_1^*}{Z_2(z)} \\
q_4^* = \frac{\beta_4^* Z_1(z)}{Z_2(z)^2} \mathcal{G}_{\rho_Y}\left(\frac{Z_1(z)}{Z_2(z)}\right) - \frac{\beta_4^*}{Z_2(z)}
\end{cases} \quad (71)$$

700 where  $\rho_Y$  is the limiting eigenvalue distribution of  $\mathbf{Y}\mathbf{Y}^\top$ .

701 The relation (69) and the solutions (71) hold for arbitrary indices  $i, j$ , so we can state the relation in  
702 the matrix form. Computing the inverse of  $\mathbf{C}_Y^{*-1}$  (see section H.2), we have:

$$\begin{aligned}
\langle \mathbf{G}_S(z) \rangle_{O,U,V} &= \left\langle \begin{bmatrix} \frac{1}{z} \mathbf{I}_N + \frac{1}{z} \mathbf{S} \mathbf{G}_{S^\top S}(z^2) \mathbf{S}^\top & \mathbf{S} \mathbf{G}_{S^\top S}(z^2) \\ \mathbf{G}_{S^\top S}(z^2) \mathbf{S}^\top & z \mathbf{G}_{S^\top S}(z^2) \end{bmatrix} \right\rangle \\
&= \begin{bmatrix} \frac{1}{z - \beta_1^*} \mathbf{I}_N + \frac{\beta_4^{*2}}{(z - \beta_1^*) Z_2(z)} \mathbf{Y} \mathbf{G}_{Y^\top Y}\left(\frac{Z_1(z)}{Z_2(z)}\right) \mathbf{Y}^\top & \frac{\beta_4^*}{Z_2(z)} \mathbf{Y} \mathbf{G}_{Y^\top Y}\left(\frac{Z_1(z)}{Z_2(z)}\right) \\ \frac{\beta_4^*}{Z_2(z)} \mathbf{G}_{Y^\top Y}\left(\frac{Z_1(z)}{Z_2(z)}\right) \mathbf{Y}^\top & \frac{z - \beta_1^*}{Z_2(z)} \mathbf{G}_{Y^\top Y}\left(\frac{Z_1(z)}{Z_2(z)}\right) \end{bmatrix} \quad (72)
\end{aligned}$$

703 With this relation, we can further simplify the solution (71).

704 We start with comparing the trace of upper-left block in (72). The normalized trace of the first block  
705 in  $\langle \mathbf{G}_S(z) \rangle_{O,U,V}$  is computed in (43) to be  $\mathcal{G}_{\bar{\mu}_S}(z)$ . The normalized trace of the upper-left block in  
706  $\mathbf{C}_Y^{*-1}$  is:

$$\begin{aligned}
&\frac{1}{N} \text{Tr} \left[ (z - \beta_1^*)^{-1} \mathbf{I}_N + \frac{\beta_4^{*2}}{(z - \beta_1^*) Z_2(z)} \mathbf{Y} \mathbf{G}_{Y^\top Y}\left(\frac{Z_1(z)}{Z_2(z)}\right) \mathbf{Y}^\top \right] \\
&= \frac{1}{N} \frac{1}{z - \beta_1^*} \sum_{k=1}^N \left[ 1 + \frac{\beta_4^{*2}}{Z_2(z)} \frac{\sigma_k^2}{\frac{Z_1(z)}{Z_2(z)} - \sigma_k^2} \right] \\
&= \frac{1}{N} \frac{1}{z - \beta_1^*} \sum_{k=1}^N \left[ \frac{\beta_4^{*2} Z_1(z)}{Z_2^2(z)} \frac{1}{\frac{Z_1(z)}{Z_2(z)} - \sigma_k^2} + 1 - \frac{\beta_4^{*2}}{Z_2(z)} \right] \quad (73) \\
&= \frac{1}{N} \frac{1}{z - \beta_1^*} \frac{\beta_4^{*2} Z_1(z)}{Z_2^2(z)} \sum_{k=1}^N \frac{1}{\frac{Z_1(z)}{Z_2(z)} - \sigma_k^2} + \frac{1}{z - \beta_1^*} \frac{\beta_3^*(z - \beta_1^*)}{Z_2(z)} \\
&= \frac{(z - \beta_2^*)\beta_4^{*2}}{Z_2(z)^2} \mathcal{G}_{\rho_Y}\left(\frac{Z_1(z)}{Z_2(z)}\right) + \frac{\beta_3^*}{Z_2(z)} \\
&= q_1^*
\end{aligned}$$

707 Thus,  $q_1^* = \mathcal{G}_{\bar{\mu}_S}(z)$ .

708 The normalized trace of the lower-right block of  $\langle \mathbf{G}_S(z) \rangle_{\mathbf{O}, \mathbf{U}, \mathbf{V}}$  is  $\alpha \mathcal{G}_{\bar{\mu}_S}(z) + (1 - \alpha) \frac{1}{z}$  (see (44)).

709 The normalized trace of the lower-right block in  $\mathbf{C}_Y^{*-1}$  is:

$$\begin{aligned}
\frac{1}{M} \text{Tr} \left[ \frac{z - \beta_1^*}{Z_2(z)} \mathbf{G}_{Y^\top Y} \left( \frac{Z_1(z)}{Z_2(z)} \right) \right] &= \frac{1}{M} \frac{z - \beta_1^*}{Z_2(z)} \sum_{k=1}^N \frac{1}{\frac{Z_1(z)}{Z_2(z)} - \sigma_k^2} + \frac{M - N}{M} \frac{z - \beta_1^*}{Z_2(z)} \frac{Z_2(z)}{Z_1(z)} \\
&= \frac{N}{M} \frac{1}{N} \frac{z - \beta_1^*}{Z_2(z)} \sum_{k=1}^N \frac{1}{\frac{Z_1(z)}{Z_2(z)} - \sigma_k^2} + \frac{M - N}{M} \frac{z - \beta_1^*}{Z_1(z)} \quad (74) \\
&= \alpha \frac{z - \beta_1^*}{Z_2(z)} \mathcal{G}_{\rho_Y} \left( \frac{Z_1(z)}{Z_2(z)} \right) + \frac{1 - \alpha}{z - \beta_2^*} \\
&= q_2^*
\end{aligned}$$

710 So,  $q_2^* = \alpha \mathcal{G}_{\bar{\mu}_S}(z) + (1 - \alpha) \frac{1}{z}$ .

711 With a bit of algebra, we can express the parameters  $q_3^*, q_4^*$  in terms of  $q_1^*, \beta_1^*, \beta_4^*$ :

$$q_3^* = \frac{(z - \beta_1^*)^2}{\beta_4^{*2}} q_1^* - \frac{z - \beta_1^*}{\beta_4^{*2}}, \quad q_4^* = \frac{z - \beta_1^*}{\beta_4^*} q_1^* - \frac{1}{\beta_4^*} \quad (75)$$

712 Therefore, the solution can be written without involving  $\mathcal{G}_{\rho_Y}$ , as:

$$\begin{cases}
\beta_1^* = \frac{\mathcal{C}_{\mu_W}^{(\alpha)}(q_1^* q_2^*)}{q_1^*} + \frac{1}{2} \sqrt{\frac{q_3^*}{q_1^*}} \left( \mathcal{R}_{\rho_X}(q_4^* + \sqrt{q_1^* q_3^*}) - \mathcal{R}_{\rho_X}(q_4^* - \sqrt{q_1^* q_3^*}) \right) \\
\beta_2^* = \alpha \frac{\mathcal{C}_{\mu_W}^{(\alpha)}(q_1^* q_2^*)}{q_2^*} \\
\beta_3^* = \frac{1}{2} \sqrt{\frac{q_1^*}{q_3^*}} \left( \mathcal{R}_{\rho_X}(q_4^* + \sqrt{q_1^* q_3^*}) - \mathcal{R}_{\rho_X}(q_4^* - \sqrt{q_1^* q_3^*}) \right) \\
\beta_4^* = \frac{1}{2} \left( \mathcal{R}_{\rho_X}(q_4^* + \sqrt{q_1^* q_3^*}) + \mathcal{R}_{\rho_X}(q_4^* - \sqrt{q_1^* q_3^*}) \right) \\
q_1^* = \mathcal{G}_{\bar{\mu}_S}(z) \\
q_2^* = \alpha \mathcal{G}_{\bar{\mu}_S}(z) + (1 - \alpha) \frac{1}{z} \\
q_3^* = \frac{(z - \beta_1^*)^2}{\beta_4^{*2}} \mathcal{G}_{\bar{\mu}_S}(z) - \frac{z - \beta_1^*}{\beta_4^{*2}} \\
q_4^* = \frac{z - \beta_1^*}{\beta_4^*} \mathcal{G}_{\bar{\mu}_S}(z) - \frac{1}{\beta_4^*}
\end{cases} \quad (76)$$

713 **Remark 5.** The simplifications in (75) are derived with the assumption that  $\beta_4^* \neq 0$ . However, in  
714 the initial set of equations (71), if  $\rho_X$  is symmetric measure then  $\beta_4^* = q_4^* = 0$  is a solution. If  $\rho_X$  is  
715 symmetric, then  $\mathcal{R}_{\rho_X}(-z) = -\mathcal{R}_{\rho_X}(z)$ , and plugging  $q_4^* = 0$  in the expression for  $\beta_4^*$  in (71), we  
716 find that  $\beta_4^* = 0$ .

### 717 D.3 Overlaps and the optimal singular values

718 From (59), (72), we find:

$$\begin{aligned}
O_Y(\gamma, \sigma_i) &\approx \frac{1}{\pi \bar{\mu}_S(\gamma)} \text{Im} \lim_{z \rightarrow \gamma - i0^+} \frac{\beta_4^*}{Z_2(z)} \mathbf{y}_i^{(r)\top} \mathbf{G}_{Y^\top Y} \left( \frac{Z_1(z)}{Z_2(z)} \right) \mathbf{Y}^\top \mathbf{y}_i^{(l)} \\
&= \frac{1}{\pi \bar{\mu}_S(\gamma)} \text{Im} \lim_{z \rightarrow \gamma - i0^+} \beta_4^* \frac{\sigma_i}{Z_1(z) - Z_2(z) \sigma_i^2} \quad (77)
\end{aligned}$$



719 From the overlap, we can compute the optimal singular values:

$$\begin{aligned}
\widehat{\xi}_{y_i}^* &\approx \frac{1}{N} \sum_{j=1}^N \sigma_j O_Y(\gamma_i, \sigma_j) \\
&\approx \frac{1}{\pi \bar{\mu}_S(\gamma_i)} \operatorname{Im} \lim_{z \rightarrow \gamma_i - i0^+} \frac{1}{N} \sum_{j=1}^N \beta_4^* \frac{\sigma_j^2}{Z_1(z) - Z_2(z) \sigma_j^2} \\
&= \frac{1}{\pi \bar{\mu}_S(\gamma_i)} \operatorname{Im} \lim_{z \rightarrow \gamma_i - i0^+} \frac{1}{N} \frac{\beta_4^*}{Z_2(z)} \sum_{j=1}^N \frac{\sigma_j^2}{\frac{Z_1(z)}{Z_2(z)} - \sigma_j^2} \\
&= \frac{1}{\pi \bar{\mu}_S(\gamma_i)} \operatorname{Im} \lim_{z \rightarrow \gamma_i - i0^+} \frac{1}{N} \frac{\beta_4^*}{Z_2(z)} \sum_{j=1}^N \left[ \frac{\frac{Z_1(z)}{Z_2(z)}}{\frac{Z_1(z)}{Z_2(z)} - \sigma_j^2} - 1 \right] \\
&\approx \frac{1}{\pi \bar{\mu}_S(\gamma_i)} \operatorname{Im} \lim_{z \rightarrow \gamma_i - i0^+} \frac{\beta_4^* Z_1(z)}{Z_2(z)^2} \mathcal{G}_{\rho_Y} \left( \frac{Z_1(z)}{Z_2(z)} \right) - \frac{\beta_4^*}{Z_2(z)} \\
&= \frac{1}{\pi \bar{\mu}_S(\gamma_i)} \operatorname{Im} \lim_{z \rightarrow \gamma_i - i0^+} q_4^*
\end{aligned} \tag{78}$$

720 where in the last equality we used the solution we have found in (71). Note that, based on (76), we do  
721 not need to have any knowledge about  $\rho_Y$  to compute  $q_4^*$ . In the end, we need to divide the estimator  
722 by  $\sqrt{\kappa}$  as we have absorbed it into  $Y$ .

### 723 D.3.1 Recovering the rectangular RIE for a denoising problem

724 Note that if in the model (60), we put  $X = I$  the model reduces to the additive denoising of  $Y$ , and  
725 we recover the estimator recently proposed in [18] for the rectangular case.

726 For  $X = I$ ,  $\mathcal{R}_{\rho_X}(z) = 1$ , so (76) reduces to:

$$\begin{cases} \beta_1^* = \frac{\mathcal{C}_{\mu_W}^{(\alpha)}(q_1^* q_2^*)}{q_1^*}, & \beta_2^* = \alpha \frac{\mathcal{C}_{\mu_W}^{(\alpha)}(q_1^* q_2^*)}{q_2^*}, & \beta_3^* = 0, & \beta_4^* = 1 \\ q_1^* = \mathcal{G}_{\bar{\mu}_S}(z), & q_2^* = \alpha \mathcal{G}_{\bar{\mu}_S}(z) + (1 - \alpha) \frac{1}{z} \\ q_3^* = (z - \beta_1^*)^2 \mathcal{G}_{\bar{\mu}_S}(z) - (z - \beta_1^*), & q_4^* = (z - \beta_1^*) \mathcal{G}_{\bar{\mu}_S}(z) - 1 \end{cases} \tag{79}$$

727 From (78), we have:

$$\begin{aligned}
\widehat{\xi}_{y_i}^* &= \frac{1}{\pi \bar{\mu}_S(\gamma_i)} \operatorname{Im} \lim_{z \rightarrow \gamma_i - i0^+} q_4^* \\
&= \frac{1}{\pi \bar{\mu}_S(\gamma_i)} \operatorname{Im} \lim_{z \rightarrow \gamma_i - i0^+} z \mathcal{G}_{\bar{\mu}_S}(z) - \beta_1^* \mathcal{G}_{\bar{\mu}_S}(z) - 1 \\
&= \frac{1}{\pi \bar{\mu}_S(\gamma_i)} \operatorname{Im} \lim_{z \rightarrow \gamma_i - i0^+} z \mathcal{G}_{\bar{\mu}_S}(z) - \frac{\mathcal{C}_{\mu_W}^{(\alpha)}(q_1^* q_2^*)}{q_1^*} \mathcal{G}_{\bar{\mu}_S}(z) - 1 \\
&= \frac{1}{\pi \bar{\mu}_S(\gamma_i)} \operatorname{Im} \lim_{z \rightarrow \gamma_i - i0^+} z \mathcal{G}_{\bar{\mu}_S}(z) - \mathcal{C}_{\mu_W}^{(\alpha)}(q_1^* q_2^*) - 1 \\
&= \frac{1}{\pi \bar{\mu}_S(\gamma_i)} \operatorname{Im} \lim_{z \rightarrow \gamma_i - i0^+} z \mathcal{G}_{\bar{\mu}_S}(z) - \mathcal{C}_{\mu_W}^{(\alpha)} \left( \mathcal{G}_{\bar{\mu}_S}(z) \left( \alpha \mathcal{G}_{\bar{\mu}_S}(z) + (1 - \alpha) \frac{1}{z} \right) \right) - 1 \\
&\stackrel{(a)}{=} \frac{1}{\pi \bar{\mu}_S(\gamma_i)} \operatorname{Im} \left[ \gamma_i \mathcal{G}_{\bar{\mu}_S}(\gamma_i - i0^+) - \mathcal{C}_{\mu_W}^{(\alpha)} \left( \frac{1}{\gamma_i} \mathcal{G}_{\bar{\mu}_S}(\gamma_i - i0^+) \left( 1 - \alpha + \alpha \gamma_i \mathcal{G}_{\bar{\mu}_S}(\gamma_i - i0^+) \right) \right) \right] \\
&\stackrel{(b)}{=} \gamma_i - \frac{1}{\pi \bar{\mu}_S(\gamma_i)} \operatorname{Im} \mathcal{C}_{\mu_W}^{(\alpha)} \left( \frac{1 - \alpha}{\gamma_i} \pi \mathbf{H}[\bar{\mu}_S](\gamma_i) + \alpha (\pi \mathbf{H}[\bar{\mu}_S](\gamma_i))^2 - \alpha (\pi \bar{\mu}_S(\gamma_i))^2 \right. \\
&\quad \left. + i \pi \bar{\mu}_S(\gamma_i) \left( \frac{1 - \alpha}{\gamma_i} + 2 \alpha \pi \mathbf{H}[\bar{\mu}_S](\gamma_i) \right) \right) \tag{80}
\end{aligned}$$

728 where in (a) we used the analyticity of rectangular R-transform [44], and in (b), we used Plemelj  
729 formula (6). Note that, the final estimator should be divided by the  $\sqrt{\kappa}$ .

#### 730 D.4 Examples

731 Throughout the numerical experiments, we consider the matrix  $\mathbf{W}$  to have i.i.d. Gaussian entries  
 732 with variance  $1/N$ , so  $C_{\mu_W}^{(\alpha)}(z) = \frac{1}{\alpha}z$ . And,  $\mathbf{X} = \mathbf{F} + c\mathbf{I}$  where  $\mathbf{F} = \mathbf{F}^\top \in \mathbb{R}^{N \times N}$  has i.i.d. entries  
 733 with variance  $1/N$ , and  $c \neq 0$  is a real number, so  $\mathcal{R}_{\rho_X}(z) = z + c$ . With these choices, the solution  
 734 (76) simplifies to:

$$\begin{cases} \beta_1^* = \frac{1}{\alpha}q_2^* + q_3^*, & \beta_2^* = q_1^*, & \beta_3^* = q_1^*, & \beta_4^* = q_4^* + c \\ q_1^* = \mathcal{G}_{\bar{\mu}_S}(z), & q_2^* = \alpha\mathcal{G}_{\bar{\mu}_S}(z) + (1-\alpha)\frac{1}{z} \\ q_3^* = \frac{(z-\beta_1^*)^2}{\beta_4^{*2}}\mathcal{G}_{\bar{\mu}_S}(z) - \frac{z-\beta_1^*}{\beta_4^*}, & q_4^* = \frac{z-\beta_1^*}{\beta_4^*}\mathcal{G}_{\bar{\mu}_S}(z) - \frac{1}{\beta_4^*} \end{cases} \quad (81)$$

735 Note that in (81),  $q_1^*, q_2^*$  are given in terms of the observation, so to find the solution we only need to  
 736 find the parameters  $q_3^*, q_4^*$ . In (81), one can see that we have the relation  $q_3^* = \frac{z-\beta_1^*}{\beta_4^*}q_4^*$ . Writing the  
 737 parameters  $\beta_1^*, \beta_4^*$  in terms of  $q_2^*, q_3^*, q_4^*$ , after a bit of algebra we have the following relation:

$$q_3^* = \frac{z - \frac{1}{\alpha}q_2^*}{2q_4^* + c}q_4^* \quad (82)$$

738 In the expression for  $q_4^*$  in (81), using (82) we can rewrite  $\beta_1^*, \beta_4^*$  in terms of  $q_2^*, q_4^*$ . After some  
 739 manipulations we find that  $q_4^*$  is the solution to the following cubic equation:

$$2x^3 + 3cx^2 + \left[ c^2 + 2 - \left( z - \mathcal{G}_{\bar{\mu}_S}(z) - \frac{1-\alpha}{\alpha}\frac{1}{z} \right) \mathcal{G}_{\bar{\mu}_S}(z) \right] x - c \left[ \left( z - \mathcal{G}_{\bar{\mu}_S}(z) - \frac{1-\alpha}{\alpha}\frac{1}{z} \right) \mathcal{G}_{\bar{\mu}_S}(z) - 1 \right] = 0 \quad (83)$$

740 Based on our numerical simulations, we pick the following root for  $q_4^*$ :

$$q_4^* = -\frac{c}{2} - \frac{12 - 3c^2 + 6A}{3\sqrt[3]{B}} + \frac{\sqrt[3]{B}}{12} \quad (84)$$

741 with

$$\begin{aligned} A &= \mathcal{G}_{\bar{\mu}_S}(z)^2 - \frac{\mathcal{G}_{\bar{\mu}_S}(z)}{z} \left( 1 - \frac{1}{\alpha} \right) - \mathcal{G}_{\bar{\mu}_S}(z)z \\ B &= -216cA + 4\sqrt[3]{4(12 - 3c^2 + 6A)^3 + 54^2c^2A^2} \end{aligned}$$

742 Once we have  $q_4^*$ , we can find  $q_3^*$  using (82). In the end,  $\beta_1^*, \dots, \beta_4^*$  can be evaluated. Note that, for  
 743 the RIE, only  $q_4^*$  is required. Other parameters are used to evaluate the resolvent relation (72) and the  
 744 overlap (77).

##### 745 D.4.1 Resolvent relation

746 We take  $\kappa = 1$ . In model (60), without loss of generality we can consider  $\mathbf{Y}$  to be diagonal.

747 In figure 12,  $\mathbf{Y}$  is the diagonal matrix obtained from the singular values of a Gaussian matrix with  
 748 i.i.d. entries of variance  $1/N$ . In figure 13, the non-zero entries (on main diagonal) of  $\mathbf{Y}$  are uniformly  
 749 distributed in  $[1, 3]$ . As in previous cases,  $\mu_S, \mathcal{G}_{\bar{\mu}_S}(z)$  are estimated numerically using Cauchy kernel,  
 750 from which the parameters  $\beta_1^*, \dots, \beta_4^*$  are computed.

##### 751 D.4.2 Overlap

752 To illustrate the formula for the overlap (77), we fix the matrix  $\mathbf{Y}$  and run experiments over various  
 753 realization of the model (60). For each experiment, we record the overlap of  $k$ -th singular vectors left  
 754 and right) of  $\mathbf{S}$  and singular vectors of  $\mathbf{Y}$ . To compute the theoretical prediction, we evaluate the  
 755 parameters  $\beta_1^*, \beta_2^*, \beta_3^*, \beta_4^*$ , for  $z = \bar{\gamma}_k - i0^+$  where  $\bar{\gamma}_k$  is the average of  $k$ -th singular value of  $\mathbf{S}$  in  
 756 the experiments.

757 In figure 14a, the overlap is shown for  $\mathbf{Y}$  with i.i.d. Gaussian entries of variance  $\frac{1}{N}$ , so  $\mu_Y$  is the  
 758 Marchenko-Pastur law with aspect-ratio  $\alpha$ . In figure 14b, matrix  $\mathbf{Y}$  is constructed as  $\mathbf{Y} = \mathbf{U}_Y \mathbf{\Sigma} \mathbf{V}_Y^\top$ ,  
 759 where  $\mathbf{U}_Y \in \mathbb{R}^{N \times N}$ ,  $\mathbf{V}_Y \in \mathbb{R}^{M \times M}$  are Haar distributed orthogonal matrices, and singular values  
 760  $\sigma_1, \dots, \sigma_N$  are chosen independently uniformly from  $[1, 3]$ , so  $\mu_Y = \mathcal{U}([1, 3])$ .

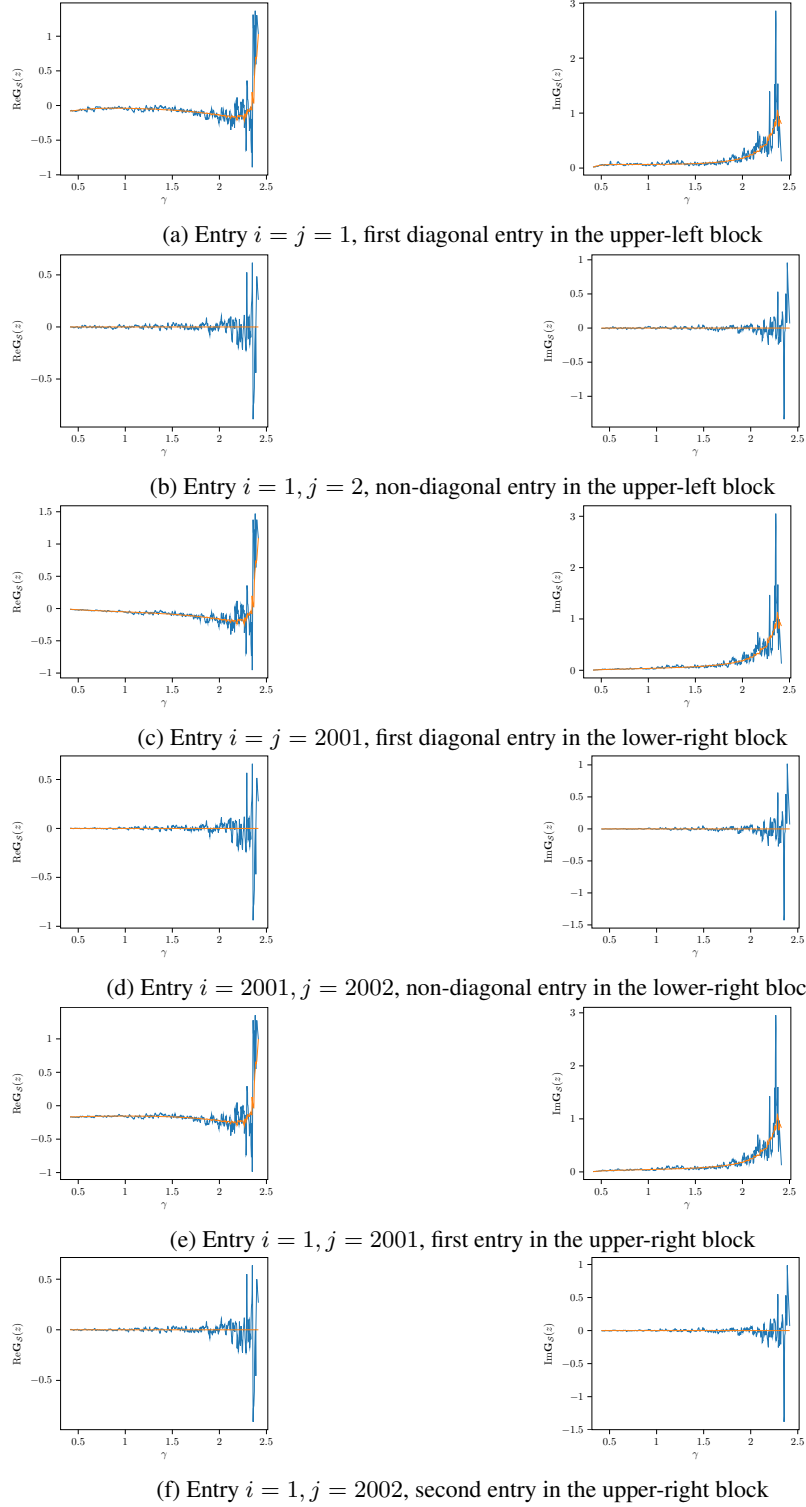

Figure 12: Illustration of (72).  $\mathbf{Y} \in \mathbb{R}^{N \times M}$  is a diagonal matrix obtained from the singular values of a  $N \times M$  matrix with i.i.d. entries of variance  $1/N$ ,  $\mathbf{X} = \mathbf{X}^\top$  is shifted Wigner matrix with  $c = 3$ , and  $\mathbf{Z}$  is a Gaussian matrices with. The empirical estimate of  $\mathbf{G}_S(z)$  (dashed blue line) is computed for  $z = \gamma_i - i\sqrt{\frac{1}{2N}}$  for  $1 \leq i \leq N$ , for  $N = 2000, M = 4000$ . Theoretical one (solid orange line) is computed from the rhs of (72) with parameters computed from the generated matrix. Note that, the theoretical one has also fluctuations because the parameters  $\beta_1^*, \dots, \beta_4^*$  are computed from the numerical estimate of  $\mathcal{G}_{\bar{\mu}_S}(z)$ .

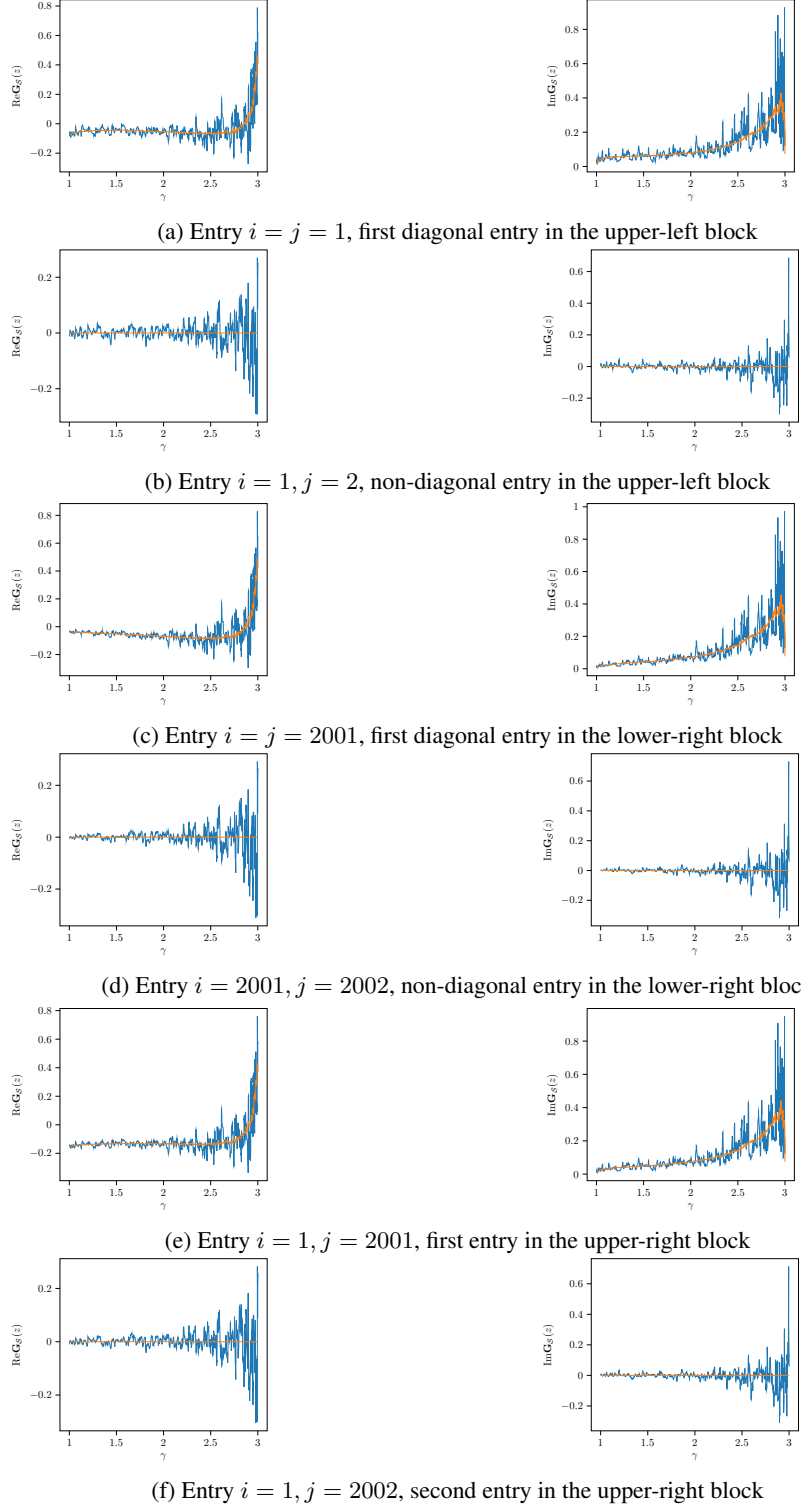

Figure 13: Illustration of (72).  $\mathbf{Y} \in \mathbb{R}^{N \times M}$  is a diagonal matrix with (main) diagonal entries uniformly distributed in  $[1, 3]$ ,  $\mathbf{X} = \mathbf{X}^\top$  is shifted Wigner matrix with  $c = 3$ , and  $\mathbf{Z}$  is a Gaussian matrices with. The empirical estimate of  $\mathbf{G}_S(z)$  (dashed blue line) is computed for  $z = \gamma_i - i\sqrt{\frac{1}{2N}}$  for  $1 \leq i \leq N$ , for  $N = 2000, M = 4000$ . Theoretical one (solid orange line) is computed from the rhs of (72) with parameters computed from the generated matrix. Note that, the theoretical one has also fluctuations because the parameters  $\beta_1^*, \dots, \beta_4^*$  are computed from the numerical estimate of  $\mathcal{G}_{\bar{\mu}_S}(z)$ .

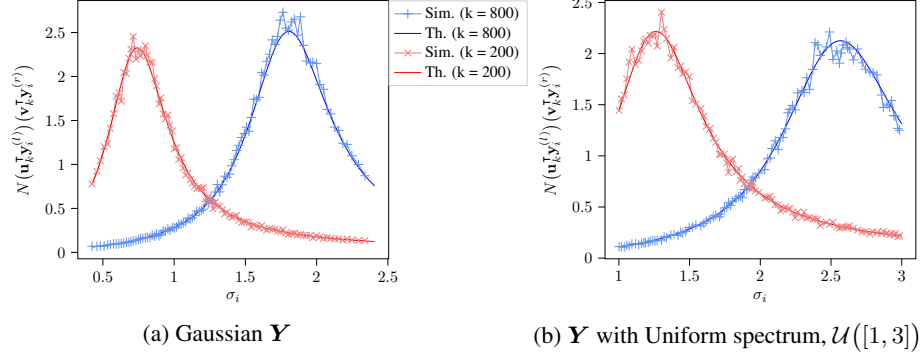

Figure 14: Computation of the rescaled overlap.  $\mathbf{X}$  is a shifted Wigner matrix with  $c = 3$ , and  $\mathbf{W}$  has i.i.d. Gaussian entries of variance  $1/N$ , and  $N/M = 1/2$ . The simulation results are average of 1000 experiments with fixed  $\mathbf{Y}$ , and  $N = 1000$ ,  $M = 2000$ . Some of the simulation points are dropped for clarity.

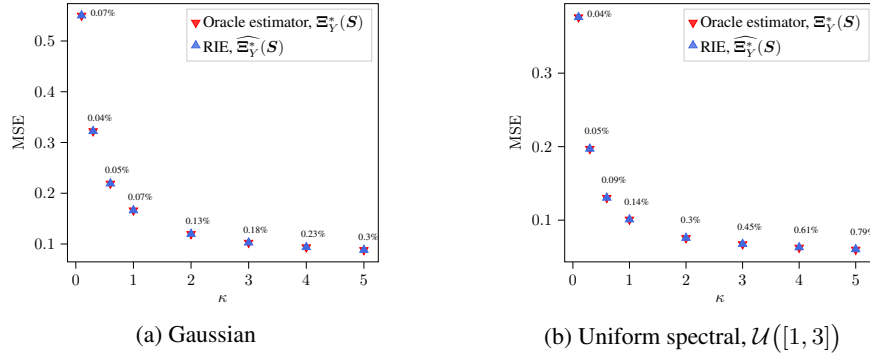

Figure 15: Estimating  $\mathbf{Y}$ . MSE is normalized by the norm of the signal,  $\|\mathbf{Y}\|_F^2$ .  $\mathbf{X}$  is a shifted Wigner matrix with  $c = 3$ , and  $\mathbf{W}$  has i.i.d. Gaussian entries of variance  $1/N$ , and  $N/M = 1/2$ . The RIE is applied to  $N = 2000$ ,  $M = 4000$ , and the results are averaged over 10 runs (error bars are invisible). Average relative error between RIE  $\widehat{\Xi}_{\mathbf{Y}}^*(S)$  and Oracle estimator is also reported.

### 761 D.4.3 RIE performance

762 In this section, we investigate the performance of our proposed estimators for  $\mathbf{Y}$ . To construct the  
 763 RIE for  $\mathbf{Y}$ , we only need  $q_4^*$  which we use (84). We compare performances of the optimal RIE (78)  
 764 with the one of oracle estimator (5).

765 In figures 15,16, the MSE of RIE and the oracle estimator is plotted for three cases of priors:  $\mathbf{Y}$  with  
 766 Gaussian entries,  $\mathbf{Y}$  with uniform spectral density, and  $\mathbf{Y}$  with Bernoulli spectral density. In all cases,  
 767 observe that the RIE has the same performance as the oracle estimator.

768 **Effect of aspect-ratio  $\alpha$ .** In Figure 17, we take  $\mathbf{Y}$  to have Gaussian entries (with variance  $\frac{1}{N}$ ),  
 769 and the MSE is depicted for various values of the aspect-ratio  $\alpha$ . We see that as  $M$  increases ( $\alpha$   
 770 decreases) the estimation error (of  $\mathbf{Y}$ ) decreases.

771 **Sparse  $\mathbf{Y}$ : a non-rotation invariant example.** We consider  $\mathbf{Y}$  to have i.i.d. entries from the  
 772 Bernoulli-Rademacher distribution,

$$Y_{i,j} = \begin{cases} +\frac{1}{\sqrt{N}} & \text{with probability } \frac{1-p}{2} \\ 0 & \text{with probability } p \\ -\frac{1}{\sqrt{N}} & \text{with probability } \frac{1-p}{2} \end{cases}, \quad \forall \quad 1 \leq i \leq N, \quad 1 \leq j \leq M$$

773 With the normalization  $1/\sqrt{N}$ , the spectrum of  $\mathbf{Y}$  does not grow with the dimension and has a finite  
 774 support, thus we can apply our estimator to reconstruct  $\mathbf{Y}$ . *Note that the prior of  $\mathbf{Y}$  is not rotationally*  
 775 *invariant, and neither the oracle estimator nor the RIE are optimal.* Therefore, taking the prior into

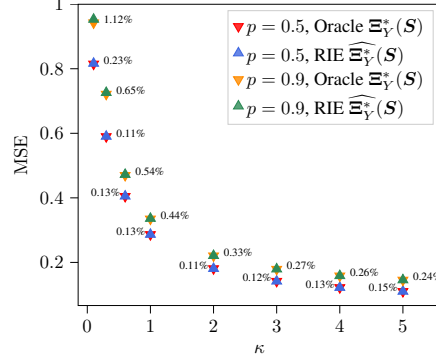

Figure 16: Estimating  $\mathbf{Y}$  with Bernoulli spectral prior. MSE is normalized by the norm of the signal,  $\|\mathbf{Y}\|_F^2$ .  $\mathbf{Y}$  has Bernoulli spectral distribution with parameter  $p$ .  $\mathbf{X}$  is a shifted Wigner matrix with  $c = 3$ , and  $\mathbf{W}$  has i.i.d. Gaussian entries of variance  $1/N$ , and  $N/M = 1/2$ . The RIE is applied to  $N = 2000$ ,  $M = 4000$ , and the results are averaged over 10 runs (error bars are invisible). Average relative error between RIE  $\widehat{\Xi}_Y^*(S)$  and Oracle estimator is also reported.

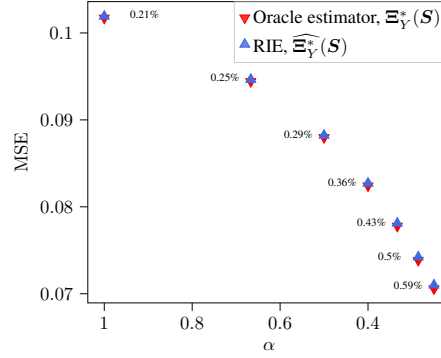

Figure 17: MSE of estimating  $\mathbf{Y}$  as a function of aspect-ratio  $\alpha$ ,  $\mathbf{Y}$  has Gaussian entries of variance  $1/N$ , and  $\kappa = 5$ . MSE is normalized by the norm of the signal,  $\|\mathbf{Y}\|_F^2$ .  $\mathbf{X}$  is a shifted Wigner matrix with  $c = 3$ , and  $\mathbf{W}$  has i.i.d. Gaussian entries of variance  $1/N$ . The RIE is applied to  $N = 2000$ ,  $M = 1/\alpha N$ , and the results are averaged over 10 runs (error bars are invisible). Average relative error between RIE  $\widehat{\Xi}_Y^*(S)$  and Oracle estimator is also reported.

776 account, we apply a thresholding function on the entries of the matrix obtained from the RIE,  $\widehat{\Xi}_Y^*(S)$ .  
 777 We apply the following function on each entry of the estimator:

$$f_h(x) = \begin{cases} +\frac{1}{\sqrt{N}} & \text{if } x > \frac{h}{\sqrt{N}} \\ 0 & \text{if } |x| \leq \frac{h}{\sqrt{N}} \\ -\frac{1}{\sqrt{N}} & \text{if } x < -\frac{h}{\sqrt{N}} \end{cases}, \quad \text{for } h \in [0, 1]$$

778 In figure 18, the MSE of the oracle estimator, RIE, and  $\text{RIE} + f_p(x)$  (with  $h = p$ ) is plotted. A few  
 779 remarks on this figure are in order. First, RIEs are not limited to rotationally invariant priors and can  
 780 give non-trivial estimates for non-rotationally invariant priors, although they are sub-optimal. The  
 781 RIE's output can be refined, or used as a warmed-up initialization for other algorithms to get a better  
 782 estimate.

783 In figure 19, for one experiment, the MSE is plotted for RIE and  $\text{RIE} + f(x)$  with the best  $h$  among  
 784  $\{0, 0.1, \dots, 1\}$ . We observe that for the particular case of Bernoulli-Rademacher prior, the thresh-  
 785 olding stage can improve the MSE when SNR is greater than 1, however the parameter  $h$  should be  
 786 chosen properly.

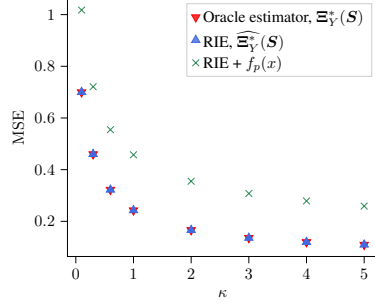

(a)  $p = 0.5$

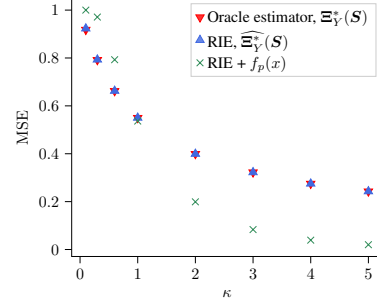

(b)  $p = 0.9$

Figure 18: Estimating  $\mathbf{Y}$  with Bernoulli-Rademacher *entries*. MSE is normalized by the norm of the signal,  $\|\mathbf{Y}\|_F^2$ .  $\mathbf{X}$  is a shifted Wigner matrix with  $c = 3$ , and  $\mathbf{W}$  has i.i.d. Gaussian entries of variance  $1/N$ , and  $N/M = 1/2$ . The RIE is applied to  $N = 2000$ ,  $M = 4000$ , and the results are averaged over 10 runs (error bars are invisible).

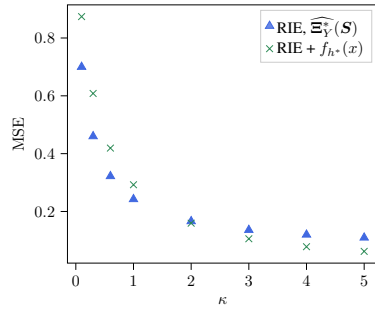

(a)  $p = 0.5$

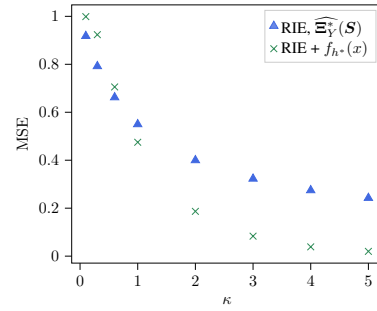

(b)  $p = 0.9$

Figure 19: Estimating  $\mathbf{Y}$  with Bernoulli-Rademacher *entries*. MSE is normalized by the norm of the signal,  $\|\mathbf{Y}\|_F^2$ .  $\mathbf{X}$  is a shifted Wigner matrix with  $c = 3$ , and  $\mathbf{W}$  has i.i.d. Gaussian entries of variance  $1/N$ , and  $N/M = 1/2$ . The RIE is applied to  $N = 2000$ ,  $M = 4000$ , and thresholding function is applied with the best  $h$  among  $\{0, 0.1, \dots, 1\}$ . Results are averaged over 10 runs (error bars are invisible).

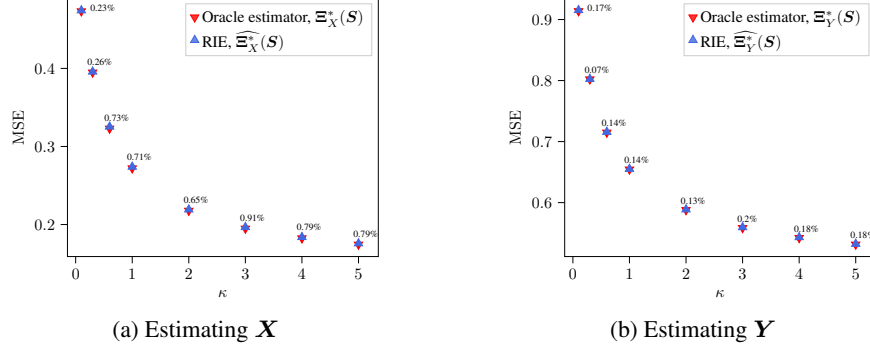

Figure 20: MSE of factorization problem. MSE is normalized by the norm of the signal.  $\mathbf{X}$  is a shifted Wigner matrix with  $c = 1$ , and both  $\mathbf{Y}$  and  $\mathbf{W}$  are  $N \times M$  matrices with i.i.d. Gaussian entries of variance  $1/N$ , and  $N/M = 1/2$ . The RIE is applied to  $N = 2000$ ,  $M = 4000$ . In each run, the observation matrix  $\mathbf{S}$  is generated according to (1), and the factors  $\mathbf{X}$ ,  $\mathbf{Y}$  are estimated simultaneously from  $\mathbf{S}$ . Results are averaged over 10 runs (error bars are invisible). Average relative error between RIEs and Oracle estimators is also reported.

## 787 E Comparison of RIEs for MF and denoising

788 For estimating  $\mathbf{X}$ , we have derived the estimator (49) for general priors  $\rho_X, \mu_Y, \mu_W$ . This estimator  
 789 simplifies greatly, with parameters in (52), when both  $\mu_Y, \mu_W$  are Marchenko-Pastur distribution,  
 790 i.e. both  $\mathbf{Y}, \mathbf{W}$  having i.i.d. Gaussian entries of variance  $1/N$ . Similarly, although the RIE for  $\mathbf{Y}$   
 791 in (78) is derived for the general priors, it reduces to a rather simple estimator if  $\rho_X, \mu_W$  are taken  
 792 to be shifted Wigner, and Marchenko-Pastur distribution, respectively. Therefore, in our numerical  
 793 examples on factorization problem, we consider  $\mathbf{X}$  to be a shifted Wigner matrix, and  $\mathbf{Y}, \mathbf{W}$  to be  
 794 Gaussian matrices.

795 In each experiment, the factors  $\mathbf{X}, \mathbf{Y}$  are estimated simultaneously using RIE from the observation  
 796 matrix  $\mathbf{S}$ . In addition to the MSE of estimating each factor, we also compute the MSE of estimating  
 797 the product  $\mathbf{XY}$ . We compare the MSE of the product with the MSE of the oracle estimator and  
 798 the RIE introduced in [18] for the denoising problem. The oracle estimator for the denoising is  
 799 constructed as:

$$\Xi_{XY}^*(S) = \sum_{i=1}^N \xi_{xy_i}^* \mathbf{u}_i \mathbf{v}_i^T, \quad \xi_{xy_i}^* = \mathbf{u}_i^T \mathbf{X} \mathbf{Y} \mathbf{v}_i \quad (85)$$

800 where  $\mathbf{u}_i, \mathbf{v}_i$ 's are left/right singular vectors of  $\mathbf{S}$ . In the RIE proposed in [18], the singular values  
 801 are estimated by (see section D.3.1)

$$\widehat{\xi_{xy_i}^*} = \frac{1}{\sqrt{\kappa}} \left[ \gamma_i - \frac{1}{\pi \bar{\mu}_S(\gamma_i)} \text{Im} \mathcal{C}_{\mu_W}^{(\alpha)} \left( \frac{1-\alpha}{\gamma_i} \pi \mathbf{H}[\bar{\mu}_S](\gamma_i) + \alpha (\pi \mathbf{H}[\bar{\mu}_S](\gamma_i))^2 - \alpha (\pi \bar{\mu}_S(\gamma_i))^2 \right. \right. \\ \left. \left. + i \pi \bar{\mu}_S(\gamma_i) \left( \frac{1-\alpha}{\gamma_i} + 2\alpha \pi \mathbf{H}[\bar{\mu}_S](\gamma_i) \right) \right) \right] \quad (86)$$

802 Note that, in general the MSE of the denoising RIE  $\widehat{\Xi}_{XY}^*(S)$ , is less than the MSE of the product of  
 803 the estimated factors  $\widehat{\Xi}_X^*(S) \widehat{\Xi}_Y^*(S)$ .

804 In figures 20,21, the MSE of estimating the factors is illustrated for  $c = 1$  and  $c = 3$  respectively.  
 805 The MSE of estimating the product is shown in figure 22.



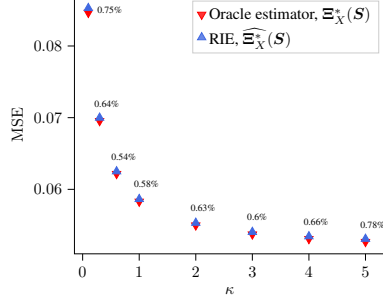

(a) Estimating  $\mathbf{X}$

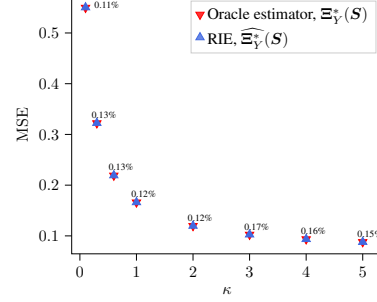

(b) Estimating  $\mathbf{Y}$

Figure 21: MSE of factorization problem. MSE is normalized by the norm of the signal.  $\mathbf{X}$  is a shifted Wigner matrix with  $c = 3$ , and both  $\mathbf{Y}$  and  $\mathbf{W}$  are  $N \times M$  matrices with i.i.d. Gaussian entries of variance  $1/N$ , and  $N/M = 1/2$ . The RIE is applied to  $N = 2000$ ,  $M = 4000$ . In each run, the observation matrix  $\mathbf{S}$  is generated according to (1), and the factors  $\mathbf{X}$ ,  $\mathbf{Y}$  are estimated simultaneously from  $\mathbf{S}$ . Results are averaged over 10 runs (error bars are invisible). Average relative error between RIEs and Oracle estimators is also reported.

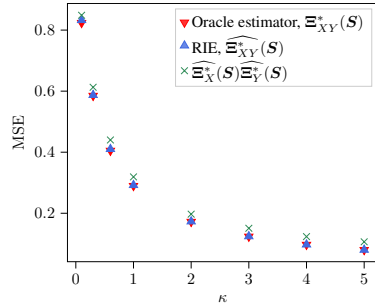

(a)  $c = 1$

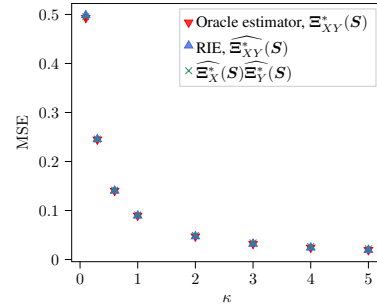

(b)  $c = 3$

Figure 22: MSE of the product of the factors. MSE is normalized by the norm of the signal  $\|\mathbf{XY}\|_F^2$ .  $\mathbf{X}$  is a shifted Wigner matrix with  $c = 1, c = 3$ , and both  $\mathbf{Y}$  and  $\mathbf{W}$  are  $N \times M$  matrices with i.i.d. Gaussian entries of variance  $1/N$ , and  $N/M = 1/2$ . The RIE is applied to  $N = 2000$ ,  $M = 4000$ . Results are averaged over 10 runs (error bars are invisible).

## 806 **F Case of $\alpha \geq 1$**

807 In this section we consider the case where  $M \leq N$  and  $N/M \rightarrow \alpha \geq 1$  as  $N \rightarrow \infty$ . Throughout this  
 808 section  $\mathbf{\Gamma} \in \mathbb{R}^{N \times M}$  is a (tall) matrix with  $\mathbf{\Gamma}_M$  in its upper  $M \times M$  block, and the rest zero entries.  
 809  $\mathbf{\Gamma}_M$  is diagonal matrix constructed from  $\gamma \in \mathbb{R}^M$  which are the singular values of  $\mathbf{S}$ .

810 Similar to the case of  $\alpha \leq 1$ , resolvent of the matrix  $\mathbf{S} \in \mathbb{R}^{(N+M) \times (N+M)}$  plays a central role in  
 811 deriving the RIEs. For the case of  $M \geq N$ , with  $\mathbf{S} = \mathbf{U}_S \mathbf{\Gamma} \mathbf{V}_S^\top$ , the matrix  $\mathbf{S}$  has the following  
 812 eigen-decomposition:

$$\mathbf{S} = \begin{bmatrix} \hat{\mathbf{U}}_S^{(1)} & -\hat{\mathbf{U}}_S^{(1)} & \mathbf{U}_S^{(2)} \\ \hat{\mathbf{V}}_S & -\hat{\mathbf{V}}_S & \mathbf{0} \end{bmatrix} \begin{bmatrix} \mathbf{\Gamma}_M & \mathbf{0} & \mathbf{0} \\ \mathbf{0} & -\mathbf{\Gamma}_M & \mathbf{0} \\ \mathbf{0} & \mathbf{0} & \mathbf{0} \end{bmatrix} \begin{bmatrix} \hat{\mathbf{U}}_S^{(1)} & -\hat{\mathbf{U}}_S^{(1)} & \mathbf{U}_S^{(2)} \\ \hat{\mathbf{V}}_S & -\hat{\mathbf{V}}_S & \mathbf{0} \end{bmatrix}^\top \quad (87)$$

813 with  $\mathbf{U}_S = \begin{bmatrix} \mathbf{U}_S^{(1)} & \mathbf{U}_S^{(2)} \end{bmatrix}$  in which  $\mathbf{U}_S^{(1)} \in \mathbb{R}^{N \times M}$ . And,  $\hat{\mathbf{U}}_S^{(1)} = \frac{1}{\sqrt{2}} \mathbf{U}_S^{(1)}$ ,  $\hat{\mathbf{V}}_S = \frac{1}{\sqrt{2}} \mathbf{V}_S$ . The  
 814 resolvent of  $\mathbf{S}$  can be written as:

$$\mathbf{G}_S(x - i\epsilon) = \sum_{k=1}^{2M} \frac{x + i\epsilon}{(x - \tilde{\gamma}_k)^2 + \epsilon^2} \mathbf{s}_k \mathbf{s}_k^\top + \frac{x + i\epsilon}{x^2 + \epsilon^2} \sum_{k=2M+1}^{M+N} \mathbf{s}_k \mathbf{s}_k^\top$$

815 where  $\tilde{\gamma}_k$  are the eigenvalues of  $\mathbf{S}$ , which are in fact the (signed) singular values of  $\mathbf{S}$ ,  $\tilde{\gamma}_1 =$   
 816  $\gamma_1, \dots, \tilde{\gamma}_M = \gamma_M, \tilde{\gamma}_{M+1} = -\gamma_1, \dots, \tilde{\gamma}_{2M} = -\gamma_M$ .

### 817 **F.1 Estimating $\mathbf{X}$**

818 The RIE for  $\mathbf{X}$  is constructed in the same way as in the case of  $\alpha \leq 1$ , (2). However, in the present  
 819 case the observation matrix  $\mathbf{S}$  has  $M$  (non-trivially zero) singular values and we need to estimate  $N$   
 820 eigenvalues for the RIE. As it will be clear, the  $N - M$  eigenvalues are chosen to be equal.

#### 821 **F.1.1 Relation between overlap and the resolvent**

822 Define the vectors  $\tilde{\mathbf{x}}_i = [\mathbf{x}_i^\top, \mathbf{0}_M]^\top$  for  $\mathbf{x}_i$  eigenvectors of  $\mathbf{X}$ . We have

$$\tilde{\mathbf{x}}_i^\top (\text{Im } \mathbf{G}_S(x - i\epsilon)) \tilde{\mathbf{x}}_i = \sum_{k=1}^{2M} \frac{\epsilon}{(x - \tilde{\gamma}_k)^2 + \epsilon^2} (\tilde{\mathbf{x}}_i^\top \mathbf{s}_k)^2 + \frac{\epsilon}{x^2 + \epsilon^2} \sum_{k=2M+1}^{M+N} (\tilde{\mathbf{x}}_i^\top \mathbf{s}_k)^2 \quad (88)$$

823 Given the structure of  $\mathbf{s}_k$ 's in (87), we have:

$$(\tilde{\mathbf{x}}_i^\top \mathbf{s}_k)^2 = \begin{cases} \frac{1}{2} (\mathbf{x}_i^\top \mathbf{u}_k)^2 & \text{for } 1 \leq k \leq M \\ \frac{1}{2} (\mathbf{x}_i^\top \mathbf{u}_{k-M})^2 & \text{for } M+1 \leq k \leq 2M \\ (\mathbf{x}_i^\top \mathbf{u}_{k-M})^2 & \text{for } 2M+1 \leq k \leq M+N \end{cases}$$

824 We assume that in the limit of large  $N$  this quantity concentrates on  $O_X(\gamma_j, \lambda_i)$  and depends only on  
 825 the singular values and eigenvalue pairs  $(\gamma_j, \lambda_i)$ . This assumption implies that the singular vectors  
 826 associated with 0 singular values ( $\mathbf{u}_j$  for  $M+1 \leq j \leq N$ ) all have the same overlap with the  
 827 eigenvectors of  $\mathbf{X}$ ,  $O_X(0, \lambda_i)$ . We thus have:

$$\tilde{\mathbf{x}}_i^\top (\text{Im } \mathbf{G}_S(x - i\epsilon)) \tilde{\mathbf{x}}_i \xrightarrow{N \rightarrow \infty} \frac{1}{\alpha} \int_{\mathbb{R}} \frac{\epsilon}{(x - t)^2 + \epsilon^2} O_X(t, \lambda_i) \bar{\mu}_S(t) dt + \left(1 - \frac{1}{\alpha}\right) \frac{\epsilon}{x^2 + \epsilon^2} O_X(0, \lambda_i) \quad (89)$$

828 where the overlap function  $O_X(t, \lambda_i)$  is extended (continuously) to arbitrary values within the  
 829 support of  $\bar{\mu}_S$  (the symmetrized limiting singular value distribution of  $\mathbf{S}$ ) with the property that  
 830  $O_X(t, \lambda_i) = O_X(-t, \lambda_i)$  for  $t \in \text{supp}(\mu_S)$ . Sending  $\epsilon \rightarrow 0$ , we find

$$\tilde{\mathbf{x}}_i^\top (\text{Im } \mathbf{G}_S(x - i\epsilon)) \tilde{\mathbf{x}}_i \rightarrow \frac{1}{\alpha} \pi \bar{\mu}_S(x) O_X(x, \lambda_i) + \left(1 - \frac{1}{\alpha}\right) \pi \delta(x) O_X(x, \lambda_i) \quad (90)$$

### 831 F.1.2 Resolvent relation

832 We derive the resolvent relation for the same model as in (29). The derivation is similar to the  
 833 procedure explained in section C.1, and we omit here. The final resolvent relation is the same as (42),  
 834 with parameters satisfying:

$$\begin{cases} \zeta_1^* = \frac{1}{\alpha} \frac{C_{\mu_W}^{(1/\alpha)}(p_1^* p_2^*)}{p_1^*}, & \zeta_2^* = \frac{1}{p_2^*} (C_{\mu_W}^{(1/\alpha)}(p_1^* p_2^*) + C_{\mu_Y}^{(1/\alpha)}(p_2^* p_3^*)), & \zeta_3^* = \frac{1}{\alpha} \frac{C_{\mu_Y}^{(1/\alpha)}(p_2^* p_3^*)}{p_3^*} \\ p_1^* = \frac{1}{\zeta_3^*} \mathcal{G}_{\rho_{X^2}}\left(\frac{z - \zeta_1^*}{\zeta_3^*}\right), & p_2^* = \frac{1}{z - \zeta_2^*}, & p_3^* = \frac{z - \zeta_1^*}{\zeta_3^*} \mathcal{G}_{\rho_{X^2}}\left(\frac{z - \zeta_1^*}{\zeta_3^*}\right) - \frac{1}{\zeta_3^*} \end{cases} \quad (91)$$

835 Again, with the same procedure as (43),(44), the saddle point equations (91) can be rewritten in a  
 836 simplified form, which does not involve  $\rho_{X^2}$ , as:

$$\begin{cases} \zeta_1^* = \frac{1}{\alpha} \frac{C_{\mu_W}^{(1/\alpha)}(p_1^* p_2^*)}{p_1^*}, & \zeta_2^* = z - \frac{1}{\mathcal{G}_{\bar{\mu}_S}(z)}, & \zeta_3^* = \frac{1}{\alpha} \frac{C_{\mu_Y}^{(1/\alpha)}(p_2^* p_3^*)}{p_3^*} \\ p_1^* = \frac{1}{\alpha} \mathcal{G}_{\bar{\mu}_S}(z) + \left(1 - \frac{1}{\alpha}\right) \frac{1}{z}, & p_2^* = \mathcal{G}_{\bar{\mu}_S}(z), & p_3^* = \frac{z - \zeta_1^*}{\alpha \zeta_3^*} \mathcal{G}_{\bar{\mu}_S}(z) + \frac{z - \zeta_1^*}{\zeta_3^*} \left(1 - \frac{1}{\alpha}\right) \frac{1}{z} - \frac{1}{\zeta_3^*} \end{cases} \quad (92)$$

837 with  $\bar{\mu}_S$  the limiting ESD of non-trivial singular values of  $\mathbf{S}$ . Note that  $\zeta_1^*, \zeta_2^*$  can be computed from  
 838 the observation matrix, and we only need to find  $\zeta_3^*$  satisfying the following equation:

$$(z - \zeta_1^*) \left[ \frac{1}{\alpha} \mathcal{G}_{\bar{\mu}_S}(z) + \left(1 - \frac{1}{\alpha}\right) \frac{1}{z} \right] - 1 = \frac{1}{\alpha} C_{\mu_Y}^{(1/\alpha)} \left( \frac{1}{\zeta_3^*} \mathcal{G}_{\bar{\mu}_S}(z) (z - \zeta_1^*) \left[ \frac{1}{\alpha} \mathcal{G}_{\bar{\mu}_S}(z) + \left(1 - \frac{1}{\alpha}\right) \frac{1}{z} \right] \right) \quad (93)$$

839 Note that both sets of equations (90), (92) and (47), (45) match for  $\alpha = 1$ .

### 840 F.1.3 Overlaps and optimal eigenvalues

841 From (90), (42), for  $\gamma$  a non-trivially zero singular value of  $\mathbf{S}$  we find:

$$\begin{aligned} O_X(\gamma, \lambda_i) &\approx \frac{\alpha}{\pi \bar{\mu}_S(\gamma)} \operatorname{Im} \lim_{z \rightarrow \gamma - i0^+} \mathbf{x}_i^\top \zeta_3^{*-1} \mathbf{G}_{X^2} \left( \frac{z - \zeta_1^*}{\zeta_3^*} \right) \mathbf{x}_i \\ &= \frac{\alpha}{\pi \bar{\mu}_S(\gamma)} \operatorname{Im} \lim_{z \rightarrow \gamma - i0^+} \frac{1}{z - \zeta_1^* - \zeta_3^* \lambda_i^2} \end{aligned} \quad (94)$$

842 And, in the case of  $M > N$ , for zero singular values we have:

$$\begin{aligned} O_X(0, \lambda_i) &\approx \frac{\alpha}{(\alpha - 1)\pi} \operatorname{Im} \lim_{z \rightarrow -i0^+} \mathbf{x}_i^\top \zeta_3^{*-1} \mathbf{G}_{X^2} \left( \frac{z - \zeta_1^*}{\zeta_3^*} \right) \mathbf{x}_i \\ &= \frac{\alpha}{(\alpha - 1)\pi} \operatorname{Im} \lim_{z \rightarrow -i0^+} \frac{1}{z - \zeta_1^* - \zeta_3^* \lambda_i^2} \end{aligned} \quad (95)$$

843 Finally, the optimal eigenvalues can be derived in the same way as in (49). For  $1 \leq i \leq M$ , we have:

$$\hat{\xi}_{x_i}^* = \frac{\alpha}{2\kappa\pi\bar{\mu}_S(\gamma_i)} \operatorname{Im} \lim_{z \rightarrow \gamma_i - i0^+} \left\{ \frac{1}{\zeta_3^*} \left[ \mathcal{G}_{\rho_X} \left( \sqrt{\frac{z - \zeta_1^*}{\kappa\zeta_3^*}} \right) + \mathcal{G}_{\rho_X} \left( -\sqrt{\frac{z - \zeta_1^*}{\kappa\zeta_3^*}} \right) \right] \right\} \quad (96)$$

844 And, for all  $M + 1 \leq i \leq N$ :

$$\hat{\xi}_{x_i}^* = \frac{\alpha}{2\kappa(\alpha - 1)\pi} \operatorname{Im} \lim_{z \rightarrow -i0^+} \left\{ \frac{1}{\zeta_3^*} \left[ \mathcal{G}_{\rho_X} \left( \sqrt{\frac{z - \zeta_1^*}{\kappa\zeta_3^*}} \right) + \mathcal{G}_{\rho_X} \left( -\sqrt{\frac{z - \zeta_1^*}{\kappa\zeta_3^*}} \right) \right] \right\} \quad (97)$$

### 845 F.1.4 Numerical Examples

846 For matrices  $\mathbf{Y}, \mathbf{W} \in \mathbb{R}^{N \times M}$  with i.i.d. Gaussian entries of variance  $1/N$  and  $M > N$ , we have that  
 847  $C_{\mu_Y}^{(1/\alpha)}(z) = C_{\mu_W}^{(1/\alpha)}(z) = z$  which leads to a simplification of equations (92):

$$\begin{cases} \zeta_1^* = \frac{1}{\alpha} p_2^*, & \zeta_2^* = z - \frac{1}{\mathcal{G}_{\bar{\mu}_S}(z)}, & \zeta_3^* = \frac{1}{\alpha} p_2^* \\ p_1^* = \frac{1}{\alpha} \mathcal{G}_{\bar{\mu}_S}(z) + \left(1 - \frac{1}{\alpha}\right) \frac{1}{z}, & p_2^* = \mathcal{G}_{\bar{\mu}_S}(z), & p_3^* = \frac{z - \zeta_1^*}{\alpha \zeta_3^*} \mathcal{G}_{\bar{\mu}_S}(z) + \frac{z - \zeta_1^*}{\zeta_3^*} \left(1 - \frac{1}{\alpha}\right) \frac{1}{z} - \frac{1}{\zeta_3^*} \end{cases} \quad (98)$$

848 Therefore,  $\zeta_1^* = \zeta_3^* = \frac{1}{\alpha} \mathcal{G}_{\bar{\mu}_S}(z)$ .

849 In Figure 23, the MSE of the Oracle estimator and the RIE (96), (97) is illustrated for shifted Wigner  
 850  $\mathbf{X}$  with  $c = 3$ , and Wishart with aspect-ratio  $\alpha' = 1/4$ .

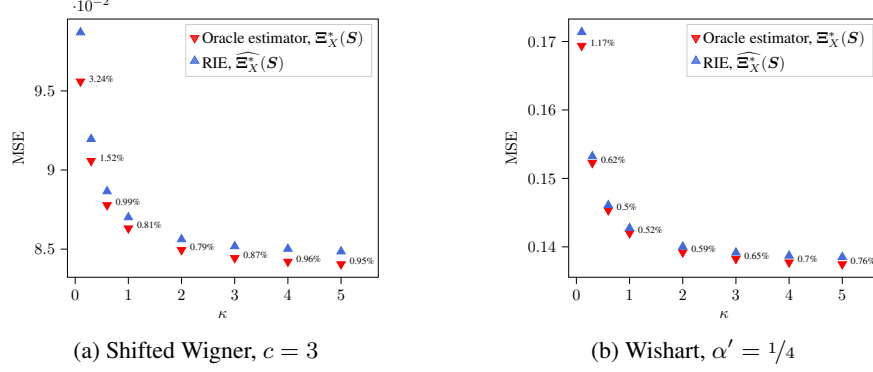

Figure 23: Estimating  $\mathbf{X}$ . The MSE is normalized by the norm of the signal,  $\|\mathbf{X}\|_F^2$ . Both  $\mathbf{Y}$  and  $\mathbf{W}$  are  $N \times M$  matrices with i.i.d. Gaussian entries of variance  $1/N$ , and aspect ratio  $N/M = 2$ . The RIE is applied to  $N = 2000$ ,  $M = 1000$ , and the results are averaged over 10 runs (error bars are invisible). Average relative error between RIE  $\widehat{\Xi}_X^*(S)$  and Oracle estimator is also reported.

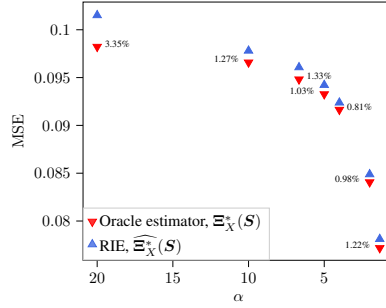

Figure 24: MSE of estimating  $\mathbf{X}$  as a function of aspect-ratio  $\alpha > 1$ , prior on  $\mathbf{X}$  is shifted Wigner with  $c = 3$ , and  $\kappa = 5$ . MSE is normalized by the norm of the signal,  $\|\mathbf{X}\|_F^2$ . Both  $\mathbf{Y}$  and  $\mathbf{W}$  are  $N \times M$  matrices with i.i.d. Gaussian entries of variance  $1/N$ . The RIE is applied to  $N = 2000$ ,  $M = 1/\alpha N$ , and the results are averaged over 10 runs (error bars are invisible). Average relative error between RIE  $\widehat{\Xi}_X^*(S)$  and Oracle estimator is also reported.

851 **Effect of aspect-ratio  $\alpha$ .** In Figure 24, we take  $\mathbf{X}$  to be a shifted Wigner matrix with  $c = 3$ , and  
852 the MSE is depicted for various values of the aspect-ratio  $\alpha > 1$ . We see that as  $M$  decreases ( $\alpha$   
853 increases) the estimation error (of  $\mathbf{Y}$ ) increases.

## 854 F.2 Estimating $\mathbf{Y}$

### 855 F.2.1 Relation between overlap and the resolvent

856 For the vectors  $\mathbf{r}_i = \begin{bmatrix} \mathbf{0}_N \\ \mathbf{y}_i^{(r)} \end{bmatrix}$ ,  $\mathbf{l}_i = \begin{bmatrix} \mathbf{y}_i^{(l)} \\ \mathbf{0}_M \end{bmatrix}$  with  $\mathbf{y}_i^{(r)}, \mathbf{y}_i^{(l)}$  right/ left singular vectors of  $\mathbf{Y}$ , we  
857 have

$$\mathbf{r}_i^\top (\text{Im } \mathbf{G}_S(x - i\epsilon)) \mathbf{l}_i = \sum_{k=1}^{2M} \frac{\epsilon}{(x - \tilde{\gamma}_k)^2 + \epsilon^2} (\mathbf{r}_i^\top \mathbf{s}_k) (\mathbf{l}_i^\top \mathbf{s}_k) + \frac{\epsilon}{x^2 + \epsilon^2} \sum_{k=2M+1}^{M+N} (\mathbf{r}_i^\top \mathbf{s}_k) (\mathbf{l}_i^\top \mathbf{s}_k) \quad (99)$$

858 Given the structure of  $\mathbf{s}_k$ 's in (87), we have:

$$(\mathbf{r}_i^\top \mathbf{s}_k) (\mathbf{l}_i^\top \mathbf{s}_k) = \begin{cases} \frac{1}{2} (\mathbf{u}_k^\top \mathbf{y}_i^{(l)}) (\mathbf{v}_k^\top \mathbf{y}_i^{(r)}) & \text{for } 1 \leq k \leq M \\ -\frac{1}{2} (\mathbf{u}_{k-M}^\top \mathbf{y}_i^{(l)}) (\mathbf{v}_{k-M}^\top \mathbf{y}_i^{(r)}) & \text{for } M+1 \leq k \leq 2M \\ 0 & \text{for } 2M+1 \leq k \leq N+M \end{cases}$$

859 Therefore, in the limit  $N \rightarrow \infty$ , we have:

$$\mathbf{r}_i^\top (\text{Im } \mathbf{G}_S(x - i\epsilon)) \mathbf{l}_i \xrightarrow{N \rightarrow \infty} \frac{1}{\alpha} \int_{\mathbb{R}} \frac{\epsilon}{(x - t)^2 + \epsilon^2} O_Y(t, \sigma_i) \bar{\mu}_S(t) dt \quad (100)$$

where the overlap function  $O_Y(t, \lambda_i)$  is extended (continuously) to arbitrary values within the support of  $\bar{\mu}_S$  with the property that  $O_Y(-t, \lambda_i) = -O_Y(t, \lambda_i)$  for  $t \in \text{supp}(\mu_S)$ . Sending  $\epsilon \rightarrow 0$ , we find

$$\mathbf{r}_i^\top (\text{Im } \mathbf{G}_S(x - i\epsilon)) \mathbf{l}_i \approx \frac{1}{\alpha} \pi \bar{\mu}_S(x) O_Y(x, \sigma_i) \quad (101)$$

## 862 F.2.2 Resolvent relation

863 The resolvent relation for the model (60) with  $M < N$  is the same as in (72) with parameters  
864 satisfying:

$$\begin{cases} \beta_1^* = \frac{1}{\alpha} \frac{C_{\mu_W}^{(\alpha)}(q_1^* q_2^*)}{q_1^*} + \frac{1}{2} \sqrt{\frac{q_3^*}{q_1^*}} \left( \mathcal{R}_{\rho_X}(q_4^* + \sqrt{q_1^* q_3^*}) - \mathcal{R}_{\rho_X}(q_4^* - \sqrt{q_1^* q_3^*}) \right) \\ \beta_2^* = \frac{C_{\mu_W}^{(\alpha)}(q_1^* q_2^*)}{q_2^*} \\ \beta_3^* = \frac{1}{2} \sqrt{\frac{q_1^*}{q_3^*}} \left( \mathcal{R}_{\rho_X}(q_4^* + \sqrt{q_1^* q_3^*}) - \mathcal{R}_{\rho_X}(q_4^* - \sqrt{q_1^* q_3^*}) \right) \\ \beta_4^* = \frac{1}{2} \left( \mathcal{R}_{\rho_X}(q_4^* + \sqrt{q_1^* q_3^*}) + \mathcal{R}_{\rho_X}(q_4^* - \sqrt{q_1^* q_3^*}) \right) \\ q_1^* = \frac{1}{\alpha} \frac{(z - \beta_2^*) \beta_4^{*2}}{Z_2(z)^2} \mathcal{G}_{\rho_Y}\left(\frac{Z_1(z)}{Z_2(z)}\right) + \frac{1}{\alpha} \frac{\beta_3^*}{Z_2(z)} + \frac{\alpha - 1}{\alpha} \frac{1}{z - \beta_1^*} \\ q_2^* = \frac{z - \beta_1^*}{Z_2(z)} \mathcal{G}_{\rho_Y}\left(\frac{Z_1(z)}{Z_2(z)}\right) \\ q_3^* = \frac{1}{\alpha} \frac{(z - \beta_1^*) Z_1(z)}{Z_2(z)^2} \mathcal{G}_{\rho_Y}\left(\frac{Z_1(z)}{Z_2(z)}\right) - \frac{1}{\alpha} \frac{z - \beta_1^*}{Z_2(z)} \\ q_4^* = \frac{1}{\alpha} \frac{\beta_4^* Z_1(z)}{Z_2(z)^2} \mathcal{G}_{\rho_Y}\left(\frac{Z_1(z)}{Z_2(z)}\right) - \frac{1}{\alpha} \frac{\beta_4^*}{Z_2(z)} \end{cases} \quad \text{with } \begin{cases} Z_1(z) = (z - \beta_1^*)(z - \beta_2^*) \\ Z_2(z) = \beta_4^{*2} + \beta_3^*(z - \beta_1^*) \end{cases} \quad (102)$$

865 With the same procedure as (73),(74), the saddle point equations (102) can be rewritten in a simplified  
866 form:

$$\begin{cases} \beta_1^* = \frac{1}{\alpha} \frac{C_{\mu_W}^{(\alpha)}(q_1^* q_2^*)}{q_1^*} + \frac{1}{2} \sqrt{\frac{q_3^*}{q_1^*}} \left( \mathcal{R}_{\rho_X}(q_4^* + \sqrt{q_1^* q_3^*}) - \mathcal{R}_{\rho_X}(q_4^* - \sqrt{q_1^* q_3^*}) \right) \\ \beta_2^* = \frac{C_{\mu_W}^{(\alpha)}(q_1^* q_2^*)}{q_2^*} \\ \beta_3^* = \frac{1}{2} \sqrt{\frac{q_1^*}{q_3^*}} \left( \mathcal{R}_{\rho_X}(q_4^* + \sqrt{q_1^* q_3^*}) - \mathcal{R}_{\rho_X}(q_4^* - \sqrt{q_1^* q_3^*}) \right) \\ \beta_4^* = \frac{1}{2} \left( \mathcal{R}_{\rho_X}(q_4^* + \sqrt{q_1^* q_3^*}) + \mathcal{R}_{\rho_X}(q_4^* - \sqrt{q_1^* q_3^*}) \right) \\ q_1^* = \frac{1}{\alpha} \mathcal{G}_{\bar{\mu}_S}(z) + \left(1 - \frac{1}{\alpha}\right) \frac{1}{z} \\ q_2^* = \mathcal{G}_{\bar{\mu}_S}(z) \\ q_3^* = \frac{(z - \beta_1^*)^2}{\beta_4^{*2}} q_1^* - \frac{z - \beta_1^*}{\beta_4^{*2}} \\ q_4^* = \frac{z - \beta_1^*}{\beta_4^*} q_1^* - \frac{1}{\beta_4^*} \end{cases} \quad (103)$$

867 Note that both sets of equations (101), (103) and (59), (76) match for  $\alpha = 1$ .

## 868 F.2.3 Overlaps and optimal singular values

869 From (72), (101), we have:

$$\begin{aligned} O_Y(\gamma, \sigma_i) &\approx \frac{\alpha}{\pi \bar{\mu}_S(\gamma)} \text{Im} \lim_{z \rightarrow \gamma - i0^+} \frac{\beta_4^*}{Z_2(z)} \mathbf{y}_i^{(r)\top} \mathbf{G}_{Y \mp Y} \left( \frac{Z_1(z)}{Z_2(z)} \right) \mathbf{Y}^\top \mathbf{y}_i^{(l)} \\ &= \frac{\alpha}{\pi \bar{\mu}_S(\gamma)} \text{Im} \lim_{z \rightarrow \gamma - i0^+} \beta_4^* \frac{\sigma_i}{Z_1(z) - Z_2(z) \sigma_i^2} \end{aligned} \quad (104)$$

870 Similar to (78), we can compute the optimal singular values to be:

$$\hat{\xi}_{y_i}^* = \frac{\alpha}{\pi \bar{\mu}_S(\gamma_i)} \text{Im} \lim_{z \rightarrow \gamma_i - i0^+} q_4^* \quad (105)$$

## 871 F.2.4 Numerical examples

872 We consider the matrix  $\mathbf{W}$  to have i.i.d. Gaussian entries with variance  $1/N$ , so  $C_{\mu_W}^{(1/\alpha)}(z) = z$ . And,  
873  $\mathbf{X} = \mathbf{F} + c\mathbf{I}$  where  $\mathbf{F} = \mathbf{F}^\top \in \mathbb{R}^{N \times N}$  has i.i.d. entries with variance  $1/N$ , and  $c \neq 0$  is a real

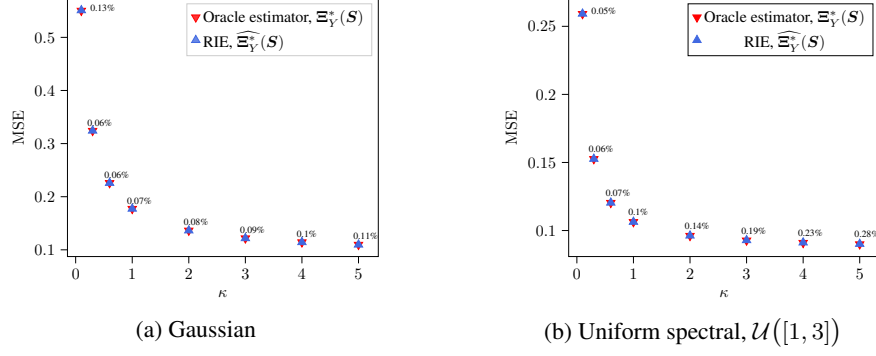

Figure 25: Estimating  $\mathbf{Y}$ . MSE is normalized by the norm of the signal,  $\|\mathbf{Y}\|_F^2$ .  $\mathbf{X}$  is a shifted Wigner matrix with  $c = 3$ , and  $\mathbf{W}$  has i.i.d. Gaussian entries of variance  $1/N$ , and  $N/M = 2$ . The RIE is applied to  $N = 2000$ ,  $M = 1000$ , and the results are averaged over 10 runs (error bars are invisible).

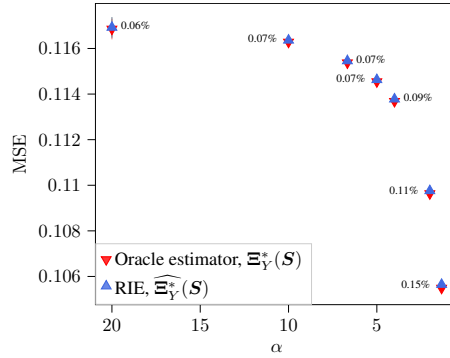

Figure 26: MSE of estimating  $\mathbf{Y}$  as a function of aspect-ratio  $\alpha > 1$ ,  $\mathbf{Y}$  has Gaussian entries of variance  $1/N$ , and  $\kappa = 5$ . MSE is normalized by the norm of the signal,  $\|\mathbf{Y}\|_F^2$ .  $\mathbf{X}$  is a shifted Wigner matrix with  $c = 3$ , and  $\mathbf{W}$  has i.i.d. Gaussian entries of variance  $1/N$ . The RIE is applied to  $N = 2000$ ,  $M = 1/\alpha N$ , and the results are averaged over 10 runs (error bars are invisible). Average relative error between RIE  $\widehat{\Xi_Y^*}(\mathbf{S})$  and Oracle estimator is also reported.

number, so  $\mathcal{R}_{\rho_X}(z) = z + c$ . With these choices, the solution (103) simplifies to:

$$\begin{cases} \beta_1^* = \frac{1}{\alpha} q_2^* + q_3^*, & \beta_2^* = q_1^*, & \beta_3^* = q_1^*, & \beta_4^* = q_4^* + c \\ q_1^* = \frac{1}{\alpha} \mathcal{G}_{\bar{\mu}_S}(z) + \left(1 - \frac{1}{\alpha}\right) \frac{1}{z}, & q_2^* = \mathcal{G}_{\bar{\mu}_S}(z) \\ q_3^* = \frac{(z - \beta_1^*)^2}{\beta_4^{*2}} q_1^* - \frac{z - \beta_1^*}{\beta_4^{*2}}, & q_4^* = \frac{z - \beta_1^*}{\beta_4^*} q_1^* - \frac{1}{\beta_4^*} \end{cases} \quad (106)$$

After a bit of algebra, we find that  $q_4^*$  is the solution to the following cubic equation:

$$2x^3 + 3cx^2 + \left[ c^2 + 2 - \left( z - \frac{1}{\alpha} \mathcal{G}_{\bar{\mu}_S}(z) \right) \left( \frac{1}{\alpha} \mathcal{G}_{\bar{\mu}_S}(z) + \frac{\alpha - 1}{\alpha z} \right) \right] x - c \left[ \left( z - \frac{1}{\alpha} \mathcal{G}_{\bar{\mu}_S}(z) \right) \left( \frac{1}{\alpha} \mathcal{G}_{\bar{\mu}_S}(z) + \frac{\alpha - 1}{\alpha z} \right) - 1 \right] = 0 \quad (107)$$

In figure 25 the MSE of RIE and the oracle estimator is plotted for two cases of priors:  $\mathbf{Y}$  with Gaussian entries and  $\mathbf{Y}$  with uniform spectral density.

**Effect of aspect-ratio  $\alpha$ .** In Figure 26, we take  $\mathbf{Y}$  to have Gaussian entries (with variance  $\frac{1}{N}$ ), and the MSE is depicted for various values of the aspect-ratio  $\alpha > 1$ . We see that as  $M$  decreases ( $\alpha$  increases) the estimation error (of  $\mathbf{Y}$ ) increases.

## 881 G Details on numerical implementations

### 882 G.1 Numerical approximation of $\mathcal{G}_{\bar{\mu}_S}(z)$

883 The first step to construct the RIEs is to compute the Stieltjes transform of the observation matrix  
 884  $\mathbf{S}$ . In section 19.5 of [45], several approaches have been proposed to approximate the Stieltjes  
 885 transform of the spectral density of a given matrix. In our implementations, we use the Cauchy kernel  
 886 method in which for a given matrix  $\mathbf{A}$  with  $N$  singular values (or eigenvalues)  $(\sigma_i)_{1 \leq i \leq N}$ ,  $\mathcal{G}_{\mu_A}(z)$   
 887 is approximated as:

$$\mathcal{G}_{\mu_A}(z) \approx \frac{1}{N} \sum_{i=1}^N \frac{1}{z - \sigma_i - i\eta_i}$$

888 with  $\eta_i$ 's the "widths" of the kernel at each singular value (more precisely the imaginary part is a sum  
 889 of Lorentzians with width  $\eta_i$  around peaks at  $\sigma_i$ ). The construction of the RIEs uses the Stieltjes  
 890 transform of the limiting symmetrized measure of  $\mathbf{S}$ . In the numerical experiments we approximate  
 891 this quantity as:

$$\mathcal{G}_{\bar{\mu}_S}(z) \approx \frac{1}{2N} \sum_{i=1}^N \left( \frac{1}{z - \gamma_i - i\eta} + \frac{1}{z + \gamma_i - i\eta} \right) \quad (108)$$

892 with a fixed width  $\eta = \sqrt{1/2N}$ . Note that for the case of  $\alpha > 1$  ( $M < N$ ),  $\mathbf{S}$  has  $M$  non-trivially  
 893 zero singular values, and in the approximation above  $N$  should be replaced by  $M$ .

### 894 G.2 Construction of the RIEs

895 In the RIEs derived in [14, 18], the final estimator for optimal singular values (eigenvalues) was rather  
 896 simple and only required to compute the Stieltjes transform on the real line which can be easily and  
 897 safely performed using the approximation above (see remark 2 in section 19.5.2 in [45]). However, in  
 898 the RIEs of this work, we need to solve a system of equations in the limit  $\epsilon \rightarrow 0$  ( $z$  close to the real  
 899 line). For this, to compute the optimal singular value  $\hat{\xi}_{y_i}^*$  (or optimal eigenvalues  $\hat{\xi}_{x_i}^*$ ), we evaluate  
 900  $\mathcal{G}_{\bar{\mu}_S}(z)$  for  $z = \gamma_i - i\frac{\epsilon}{\sqrt{2N}}$ . In this way, the other parameters (e.g.  $q_4^*$ ) are evaluated for  $z$  very close  
 901 to the real line, and the theoretical limit  $\lim_{\epsilon \rightarrow 0}$  in (49), (78) can be estimated numerically. Moreover,  
 902 as we considered a fixed width in our numerical approximation of Stieltjes transform (108),  $\epsilon$  should  
 903 be chosen to compensate the width for the cases where the support of  $\bar{\mu}_S$  is wider. For example, for  
 904 fixed  $N$ , as we increase SNR (from 1 to 5) the support of  $\bar{\mu}_S$  grows, however we still have  $N$  singular  
 905 values and the kernel's width in (108) is fixed, so  $\epsilon$  should be larger for higher SNRs to get a more  
 906 accurate approximation of  $\mathcal{G}_{\bar{\mu}_S}(z)$ .

### 907 G.3 Mismatch between RIEs and Oracle estimators

908 The RIEs are conjectured to have the same performance as the Oracle estimators in the limit  $N \rightarrow \infty$ .  
 909 Therefore, we believe that the mismatch between the proposed RIEs and the Oracle estimators is a  
 910 finite size effect. Moreover, this finiteness affects the accuracy of estimated parameters, since  $\mathcal{G}_{\bar{\mu}_S}(z)$   
 911 is approximated numerically and we do not use random matrix theory to find its exact form.

912 Generically, the mismatch between the RIE and Oracle estimator is larger for the case of estimating  
 913  $\mathbf{X}$ . We expect that this is because of the extra approximation step in the derivation of the optimal  
 914 eigenvalues. In the fifth line of (49), the sums are approximated by an integral which is the Stieltjes  
 915 transform of  $\rho_X$ . This approximation does not appear in derivation of the optimal singular values for  
 916  $\mathbf{Y}$ , see (78).

917 All in all, the small relative error (less than 1%) between RIEs and Oracle estimators in our numerical  
 918 results validates our optimality conjecture and demonstrates that RIEs can be successfully used in  
 919 practice.

## 920 H Spherical integrals and matrix lemmas

### 921 H.1 Spherical Integrals

922 For two symmetric matrices  $\mathbf{A}, \mathbf{B} \in \mathbb{R}^{N \times N}$ , the *spherical integral* is defined as:

$$\mathcal{I}_N(\mathbf{A}, \mathbf{B}) = \left\langle \exp \left\{ \frac{N}{2} \text{Tr } \mathbf{A} \mathbf{U} \mathbf{B} \mathbf{U}^\top \right\} \right\rangle_{\mathbf{U}}$$

923 where the average is w.r.t. the *Haar* measure over the group of (real) orthogonal  $N \times N$  matrices.  
 924 The spherical integrals can also be defined w.r.t. the unitary or symplectic group. These integrals  
 925 are often referred to as *Harish Chandra-Itzykson-Zuber* (HCIZ) integrals in mathematical physics  
 926 literature. The study of these objects dates back to the work of mathematician Harish Chandra [49]  
 927 and they have since been extensively studied and developed in both physics and mathematics. In  
 928 particular, [19] studied the limit of the integral in the case where one of the matrices, say  $\mathbf{A}$ , has finite  
 929 rank.

930 **Theorem 1 (Rank-one spherical integral, Guionnet and Maïda [19]).** *Let  $\theta$  be the only non-zero*  
 931 *eigenvalue of  $\mathbf{A}$  (so it is rank one), and the empirical eigenvalue distribution of  $\mathbf{B}$  converge weakly*  
 932 *towards  $\rho_B$ . Then, for  $\theta$  sufficiently small (see details in Theorem 2 in [19]), we have:*

$$\lim_{N \rightarrow \infty} \frac{1}{N} \ln \mathcal{I}_N(\mathbf{A}, \mathbf{B}) = \frac{1}{2} \int_0^\theta \mathcal{R}_{\rho_B}(t) dt \equiv \frac{1}{2} \mathcal{P}_{\rho_B}(\theta) \quad (109)$$

933 When  $\mathbf{A}$  has higher (but finite) rank, theorem 7 in [19] states that the limit is the sum over eigenvalues  
 934 of the expression on the rhs of (109).

935 **Non-symmetric case.** In the non-symmetric case the *rectangular spherical integral* is defined, for  
 936 the matrices  $\mathbf{A} \in \mathbb{R}^{M \times N}$ ,  $\mathbf{B} \in \mathbb{R}^{N \times M}$ , as:

$$\mathcal{J}_N(\mathbf{A}, \mathbf{B}) = \left\langle \exp \left\{ \sqrt{NM} \text{Tr } \mathbf{A} \mathbf{U} \mathbf{B} \mathbf{V} \right\} \right\rangle_{\mathbf{U}, \mathbf{V}}$$

937 where  $\mathbf{U} \in \mathbb{R}^{N \times N}$ ,  $\mathbf{V} \in \mathbb{R}^{M \times M}$ , and the expectation is w.r.t. the *Haar* measure over orthogonal  
 938 matrices of size  $N \times N$  and  $M \times M$ .

939 **Theorem 2 (Rank-one rectangular spherical integral, Benaych-Georges [20]).** *Let  $N/M \rightarrow \alpha \in$*   
 940  *$(0, 1]$ , and  $\theta$  be the only non-zero singular value of  $\mathbf{A}$ , and the empirical singular value distribution*  
 941 *of  $\mathbf{B}$  converges weakly towards  $\mu_B$ . Then, for  $\theta$  sufficiently small (see details in Theorem 2.2 in [20]),*  
 942 *we have:*

$$\lim_{N \rightarrow \infty} \frac{1}{N} \ln \mathcal{J}_N(\mathbf{A}, \mathbf{B}) = \int_0^\theta \frac{\mathcal{C}_{\mu_B}^{(\alpha)}(t^2)}{t} dt = \frac{1}{2} \int_0^{\theta^2} \frac{\mathcal{C}_{\mu_B}^{(\alpha)}(t)}{t} dt \equiv \frac{1}{2} \mathcal{Q}_{\mu_B}^{(\alpha)}(\theta^2) \quad (110)$$

943 In our derivation, we use a generalization of this formula, namely when  $\mathbf{A}$  has higher (but fixed) rank,  
 944 the limit is the sum over singular values of the expression on the rhs of (110). Although we are not  
 945 aware if this generalization has been proved, we believe that the ideas found in [50] can be applied to  
 946 show it holds.

947 **Remark 6.** *It is known that additional terms may be present on the rhs of (109) and (110) when*  
 948 *the parameter  $\theta$  is "large". This has been rigorously proved at least in the case of symmetric  $\mathbf{A}$  and*  
 949  *$\mathbf{B}$  (see theorem 6 in [19]). In the replica calculation the order of magnitude of this parameter is*  
 950 *determined by the solutions of the saddle point equations, but it is difficult to fully control its order*  
 951 *of magnitude. However the numerics show very good agreement between our explicit RIEs and the*  
 952 *Oracle estimator, which strongly suggests it is sound to use (109) and (110).*

### 953 H.2 Matrix analysis tools

954 **Proposition 3 (Inverse of a block matrix, Bernstein [48]).** *For a block matrix  $\mathbf{F} = \begin{bmatrix} \mathbf{A} & \mathbf{B} \\ \mathbf{C} & \mathbf{D} \end{bmatrix}$  with*

955  $\mathbf{A} \in \mathbb{R}^{N \times N}$ ,  $\mathbf{B} \in \mathbb{R}^{N \times M}$ ,  $\mathbf{C} \in \mathbb{R}^{M \times N}$ ,  $\mathbf{D} \in \mathbb{R}^{M \times M}$ , *if  $\mathbf{A}$  and  $\mathbf{D} - \mathbf{C} \mathbf{A}^{-1} \mathbf{B}$ , are non-singular,*  
 956 *then,*

$$\mathbf{F}^{-1} = \begin{bmatrix} \mathbf{A}^{-1} + \mathbf{A}^{-1} \mathbf{B} (\mathbf{D} - \mathbf{C} \mathbf{A}^{-1} \mathbf{B})^{-1} \mathbf{C} \mathbf{A}^{-1} & -\mathbf{A}^{-1} \mathbf{B} (\mathbf{D} - \mathbf{C} \mathbf{A}^{-1} \mathbf{B})^{-1} \\ -(\mathbf{D} - \mathbf{C} \mathbf{A}^{-1} \mathbf{B})^{-1} \mathbf{C} \mathbf{A}^{-1} & (\mathbf{D} - \mathbf{C} \mathbf{A}^{-1} \mathbf{B})^{-1} \end{bmatrix}$$



957 **Block structure of  $G_S(z)$**  The matrix  $G_S(z)$  is:

$$G_S(z) = (zI - S)^{-1} = \begin{bmatrix} zI_N & -S \\ -S^\top & zI_M \end{bmatrix}^{-1}$$

958 Using Proposition 3, first we need to compute the inverse matrix  $(zI_M - (-S^\top)(zI_N)^{-1}(-S))^{-1}$   
 959 which simply reads:

$$(zI_M - \frac{1}{z}S^\top S)^{-1} = z(z^2I_M - S^\top S)^{-1} = zG_{S^\top S}(z^2)$$

960 Consequently, we find:

$$G_S(z) = \begin{bmatrix} \frac{1}{z}I_N + \frac{1}{z}SG_{S^\top S}(z^2)S^\top & SG_{S^\top S}(z^2) \\ G_{S^\top S}(z^2)S^\top & zG_{S^\top S}(z^2) \end{bmatrix} \quad (111)$$

961 **Inverse of  $C_X^*$**  For  $C_X^*$  since the blocks  $B, C$  are zero, the inverse is simply:

$$\begin{aligned} C_X^{*-1} &= \begin{bmatrix} [(z - \zeta_1^*)I_N - \zeta_3^*X^2]^{-1} & \mathbf{0} \\ \mathbf{0} & [(z - \zeta_2^*)I_M]^{-1} \end{bmatrix} \\ &= \begin{bmatrix} \frac{1}{\zeta_3^*}[\frac{z - \zeta_1^*}{\zeta_3^*}I_N - X^2]^{-1} & \mathbf{0} \\ \mathbf{0} & \frac{1}{z - \zeta_2^*}I_M \end{bmatrix} \\ &= \begin{bmatrix} \frac{1}{\zeta_3^*}G_{X^2}(\frac{z - \zeta_1^*}{\zeta_3^*}) & \mathbf{0} \\ \mathbf{0} & \frac{1}{z - \zeta_2^*}I_M \end{bmatrix} \end{aligned} \quad (112)$$

962 **Inverse of  $C_Y^*$**  Let the block structure of  $C_Y^*$  be as in Proposition 3, then

$$\begin{aligned} (D - CA^{-1}B)^{-1} &= \left( (z - \beta_2^*)I_M - \beta_3^*Y^\top Y - \frac{\beta_4^{*2}}{z - \beta_1^*}Y^\top Y \right)^{-1} \\ &= \left( (z - \beta_2^*)I_M - \left( \beta_3^* + \frac{\beta_4^{*2}}{z - \beta_1^*} \right) Y^\top Y \right)^{-1} \\ &= (z - \beta_1^*) \left( Z_1(z)I_M - Z_2(z)Y^\top Y \right)^{-1} \\ &= \frac{z - \beta_1^*}{Z_2(z)} \left( \frac{Z_1(z)}{Z_2(z)}I_M - Y^\top Y \right)^{-1} \\ &= \frac{z - \beta_1^*}{Z_2(z)} G_{Y^\top Y} \left( \frac{Z_1(z)}{Z_2(z)} \right) \end{aligned}$$

963 where  $G_{Y^\top Y}$  is the resolvent of the matrix  $Y^\top Y$ . So, we have

$$C_Y^{*-1} = \begin{bmatrix} (z - \beta_1^*)^{-1}I_N + \frac{\beta_4^{*2}}{(z - \beta_1^*)Z_2(z)}Y G_{Y^\top Y} \left( \frac{Z_1(z)}{Z_2(z)} \right) Y^\top & \frac{\beta_4^*}{Z_2(z)}Y G_{Y^\top Y} \left( \frac{Z_1(z)}{Z_2(z)} \right) \\ \frac{\beta_4^*}{Z_2(z)}G_{Y^\top Y} \left( \frac{Z_1(z)}{Z_2(z)} \right) Y^\top & \frac{z - \beta_1^*}{Z_2(z)}G_{Y^\top Y} \left( \frac{Z_1(z)}{Z_2(z)} \right) \end{bmatrix}$$

964 **Lemma 3.** Consider two vectors  $x, y \in \mathbb{R}^N$ . The symmetric matrix  $xy^\top + yx^\top$  has rank at most  
 965 two with non-zero eigenvalues  $x^\top y \pm \|x\|\|y\|$ .

966 *Proof.* Construct the matrices  $A \in \mathbb{R}^{2 \times N}, B \in \mathbb{R}^{N \times 2}$  as follows:

$$A = \begin{bmatrix} x^\top \\ y^\top \end{bmatrix}, \quad B = \begin{bmatrix} y & x \end{bmatrix}$$

967 Then, we have that  $xy^\top + yx^\top = BA$ . Using the lemma 4, we have that:

$$z^2 \det(zI_N - BA) = z^N \det(zI_2 - AB)$$

968 So, the characteristic polynomial of  $xy^\top + yx^\top$  is  $z^{N-2} \det(zI_2 - AB)$ , which implies that the  
 969  $xy^\top + yx^\top$  has eigenvalue 0 with multiplicity  $N - 2$ , plus the eigenvalues of the  $2 \times 2$  matrix  $AB$ .  
 970 The matrix  $AB$  is:

$$AB = \begin{bmatrix} x^\top y & \|x\|^2 \\ \|y\|^2 & x^\top y \end{bmatrix}$$

971 which has two eigenvalues  $x^\top y \pm \|x\|\|y\|$ . □

972 **Lemma 4.** For matrices  $A \in \mathbb{R}^{M \times N}$ ,  $B \in \mathbb{R}^{N \times M}$ , we have:

$$z^M \det(zI_N - BA) = z^N \det(zI_M - AB)$$

973 *Proof.* Construct the matrices  $C, D \in \mathbb{R}^{(M+N) \times (M+N)}$  as follows:

$$C = \begin{bmatrix} zI_M & A \\ B & I_N \end{bmatrix}, \quad D = \begin{bmatrix} I_M & \mathbf{0}_{M \times N} \\ -B & zI_N \end{bmatrix}$$

974 We have:

$$\det CD = z^N \det(zI_M - AB), \quad \det DC = z^M \det(zI_N - BA)$$

975 The result follows from the fact that  $\det CD = \det DC$ . □
